# Supplementary material for: A theoretical investigation into the first-row transition metal–O2adducts
Source: Royal Society of Chemistry journal article supplement (doi:10.1039/c9qi00407f), 2019-01-01
Supplement: c9qi00407f1.pdf [file c9qi00407f1.pdf]

## Supporting Information

### **A theoretical investigation into various metal<sup>I</sup> species with an O<sub>2</sub> adduct**

Xiao-Xi Li,<sup>a</sup> Kyung-Bin Cho<sup>a,b\*</sup> and Wonwoo Nam<sup>a\*</sup>

<sup>a</sup> *Department of Chemistry and Nano Science, Ewha Womans University, Seoul 03760, Korea.*

<sup>b</sup> *Department of Chemistry, Chonbuk National University, Jeonju 54896, Korea.*

E-mail: wwnam@ewha.ac.kr, workforkyung@jbnu.ac.kr

**Table S1.** Relative Electronic Energies ( $\Delta E$ ) and Gibb's Free Energies at 298 K ( $\Delta G$ ) in Gas and Solvent (Acetonitrile) Phase with Different Functionals in kcal mol<sup>-1</sup> <sup>a</sup>

|                           |                      |      | Gas Phase            |                          |                           | Solvent Phase        |                          |
|---------------------------|----------------------|------|----------------------|--------------------------|---------------------------|----------------------|--------------------------|
|                           |                      | 2S+1 | $\Delta E$ (BP86)    | $\Delta E$ (B3LYP//BP86) | $\Delta G$ (BP86)         | $\Delta E$ (BP86)    | $\Delta E$ (B3LYP//BP86) |
| [(12-TMC)Cr] <sup>+</sup> | (No O <sub>2</sub> ) | 2    | 36.01                | 40.44                    | 36.13                     | 34.34                | 37.19                    |
|                           |                      | 4    | 20.09                | 24.26                    | 20.06                     | 16.80                | 17.03                    |
|                           |                      | 6    | <b>0.00</b>          | <b>0.00</b>              | <b>0.00</b>               | <b>0.00</b>          | <b>0.00</b>              |
|                           | Side-on              | 2    | -63.30               | -52.35                   | -48.13                    | -72.71               | -65.45                   |
|                           |                      | 4    | <b>-81.05</b>        | <b>-73.77</b>            | <b>-66.03</b>             | <b>-92.07</b>        | <b>-87.75</b>            |
|                           |                      | 6    | -43.43               | -47.23                   | -32.92                    | -46.01               | -51.65                   |
|                           | End-on               | 2    | -39.95               | -22.90                   | -25.30                    | -52.20               | -38.51                   |
|                           |                      | 4    | -52.88               | -43.32                   | -39.90                    | -65.26               | -55.90                   |
|                           |                      | 6    | -38.59               | -40.60                   | -26.51                    | -46.08               | -50.44                   |
| [(12-TMC)Mn] <sup>+</sup> | (No O <sub>2</sub> ) | 1    | 22.31                | 37.97                    | 24.30                     | 25.01                | 40.65                    |
|                           |                      | 3    | 12.37                | 27.61                    | 13.63                     | 15.15                | 30.11                    |
|                           |                      | 5    | 2.01                 | 7.95                     | 2.26                      | 2.94                 | 6.51                     |
|                           |                      | 7    | <b>0.00</b>          | <b>0.00</b>              | <b>0.00</b>               | <b>0.00</b>          | <b>0.00</b>              |
|                           | Side-on              | 1    | -55.85               | -33.01                   | -39.85                    | -62.82               | -42.89                   |
|                           |                      | 3    | -64.60               | -44.01                   | -49.15                    | -72.57               | -54.52                   |
|                           |                      | 5    | <b>-78.42</b>        | <b>-65.97</b>            | <b>-65.45</b>             | <b>-84.14</b>        | <b>-73.53</b>            |
|                           |                      | 7    | -52.45               | -54.91                   | -41.21                    | -56.53               | -60.54                   |
|                           | End-on               | 1    | -41.07               | -9.72                    | -23.91                    | -50.25               | -21.04                   |
|                           |                      | 3    | -44.40               | -20.13                   | -29.14                    | -53.88               | -29.88                   |
|                           |                      | 5    | Optimizes to side-on |                          |                           | Optimizes to side-on |                          |
|                           |                      | 7    | Optimizes to side-on |                          |                           | Optimizes to side-on |                          |
| [(12-TMC)Fe] <sup>+</sup> | (No O <sub>2</sub> ) | 2    | 4.73                 | 14.59                    | 6.22                      | 4.58                 | 14.43                    |
|                           |                      | 4    | <b>0.00</b>          | <b>0.00</b>              | <b>0.00</b>               | <b>0.00</b>          | <b>0.00</b>              |
|                           |                      | 6    | 22.55                | 16.25                    | 22.94                     | 18.19                | 12.01                    |
|                           | Side-on              | 2    | -57.64               | -38.18                   | -40.81                    | -66.39               | -51.35                   |
|                           |                      | 4    | <b>-60.45</b>        | -49.12                   | <b>-45.41</b>             | <b>-67.61</b>        | -58.58                   |
|                           |                      | 6    | -52.41               | <b>-49.51</b>            | -39.32                    | -61.57               | <b>-59.06</b>            |
|                           | End-on               | 2    | -43.60               | -22.97                   | -26.55                    | -55.21               | -31.92                   |
|                           |                      | 4    | -42.31               | -33.65                   | -28.10                    | -53.08               | -41.43                   |
|                           |                      | 6    | Optimizes to side-on |                          |                           | Optimizes to side-on |                          |
| [(12-TMC)Co] <sup>+</sup> | (No O <sub>2</sub> ) | 1    | 1.83                 | 14.74                    | 2.11                      | 1.90                 | 14.57                    |
|                           |                      | 3    | <b>0.00</b>          | <b>0.00</b>              | <b>0.00</b>               | <b>0.00</b>          | <b>0.00</b>              |
|                           |                      | 5    | 36.63                | 30.00                    | 36.63                     | 31.41                | 25.29                    |
|                           | Side-on              | 1    | <b>-46.16</b>        | <b>-28.96</b>            | -28.74                    | <b>-57.17</b>        | <b>-41.60</b>            |
|                           |                      | 3    | -44.08               | -28.60                   | <b>-31.56<sup>b</sup></b> | -49.92 <sup>c</sup>  | -37.15 <sup>c</sup>      |
|                           |                      | 5    | Optimizes to end-on  |                          |                           | -37.28               | -38.41                   |
|                           | End-on               | 1    | -34.59               | -20.71                   | -19.66                    | -43.65               | -29.27                   |
|                           |                      | 3    | -35.43               | -19.40                   | -21.48                    | -45.00               | -29.19                   |
|                           |                      | 5    | -32.03               | -27.62                   | -20.55                    | -40.07               | -35.16                   |
| [(12-TMC)Ni] <sup>+</sup> | (No O <sub>2</sub> ) | 2    | <b>0.00</b>          | <b>0.00</b>              | <b>0.00</b>               | <b>0.00</b>          | <b>0.00</b>              |
|                           |                      | 4    | 47.38                | 42.39                    | 48.07                     | 40.48                | 36.46                    |
|                           | Side-on              | 2    | <b>-28.36</b>        | -20.27                   | <b>-12.93</b>             | <b>-36.70</b>        | -28.38                   |
|                           |                      | 4    | -25.73               | <b>-27.27</b>            | -12.49                    | -31.10               | <b>-33.86</b>            |
|                           | End-on               | 2    | -20.27               | -8.48                    | -6.88                     | -27.76               | -15.43                   |
|                           |                      | 4    | -20.71               | -16.87                   | -8.92                     | -28.08               | -26.19                   |
| [(12-TMC)Cu] <sup>+</sup> | (No O <sub>2</sub> ) | 1    | <b>0.00</b>          | <b>0.00</b>              | <b>0.00</b>               | <b>0.00</b>          | <b>0.00</b>              |
|                           |                      | 3    | 56.95                | 60.74                    | 58.36                     | 49.35                | 53.73                    |
|                           | Side-on              | 1    | -7.95                | 2.49                     | 5.83                      | -12.10               | -3.58                    |
|                           |                      | 3    | -10.32 <sup>d</sup>  | -6.63 <sup>d</sup>       | 2.45 <sup>d</sup>         | -13.50 <sup>d</sup>  | -8.35 <sup>d</sup>       |
|                           | End-on               | 1    | -8.78                | -1.59                    | 4.36                      | -14.16               | -8.65                    |
|                           |                      | 3    | <b>-13.40</b>        | <b>-6.35</b>             | <b>-1.55</b>              | <b>-17.86</b>        | <b>-11.22</b>            |

**Table S1.** Relative Electronic Energies ( $\Delta E$ ) and Gibb's Free Energies at 298 K ( $\Delta G$ ) in Gas and Solvent (Acetonitrile) Phase with Different Functionals in kcal mol<sup>-1</sup> <sup>a</sup> (Continued)

|                           |                      | Gas Phase         |                                              |                     | Solvent Phase        |                          |
|---------------------------|----------------------|-------------------|----------------------------------------------|---------------------|----------------------|--------------------------|
|                           | 2S+1                 | $\Delta E$ (BP86) | $\Delta E$ (B3LYP//BP86)                     | $\Delta G$ (BP86)   | $\Delta E$ (BP86)    | $\Delta E$ (B3LYP//BP86) |
| [(14-TMC)Cr] <sup>+</sup> | (No O <sub>2</sub> ) | 2                 | 26.24                                        | 30.73               | 25.98                | 30.18                    |
|                           |                      | 4                 | 6.17                                         | 10.01               | 5.26                 | 8.18                     |
|                           |                      | 6                 | <b>0.00</b>                                  | <b>0.00</b>         | <b>0.00</b>          | <b>0.00</b>              |
|                           | Side-on              | 2                 | -59.07                                       | -47.53              | -66.23               | -57.98                   |
|                           |                      | 4                 | <b>-77.59</b>                                | <b>-69.32</b>       | <b>-86.00</b>        | <b>-80.18</b>            |
|                           |                      | 6                 | Optimizes to half side-on/end-on, see end-on |                     |                      | Optimizes to end-on      |
|                           | End-on               | 2                 | -39.94                                       | -21.99              | -50.61               | -36.46                   |
|                           |                      | 4                 | -49.93                                       | -40.79              | Optimizes to side-on |                          |
|                           |                      | 6                 | -40.86                                       | -43.72              | -47.72               | -52.38                   |
| [(14-TMC)Mn] <sup>+</sup> | (No O <sub>2</sub> ) | 1                 | 17.69                                        | 26.90               | 18.07                | 27.69                    |
|                           |                      | 3                 | 6.85                                         | 15.64               | 7.46                 | 16.54                    |
|                           |                      | 5                 | <b>0.00</b>                                  | <b>0.00</b>         | <b>0.00</b>          | <b>0.00</b>              |
|                           |                      | 7                 | 9.35                                         | 4.71                | 6.91                 | 2.69                     |
|                           | Side-on              | 1                 | -44.89                                       | -27.72              | -52.05               | -36.33                   |
|                           |                      | 3                 | -54.15                                       | -38.70              | -61.90               | -47.65                   |
|                           |                      | 5                 | <b>-70.00</b>                                | <b>-63.01</b>       | <b>-75.87</b>        | <b>-69.74</b>            |
|                           |                      | 7                 | -47.85                                       | -55.16              | -53.39               | -61.71                   |
|                           | End-on               | 1                 | -35.18                                       | -9.72               | -44.58               | -20.06                   |
|                           |                      | 3                 | Optimizes to side-on                         |                     | Optimizes to side-on |                          |
|                           |                      | 5                 | -47.18                                       | -46.92              | -56.69               | -53.40                   |
|                           |                      | 7                 | Optimizes to side-on                         |                     | Optimizes to side-on |                          |
| [(14-TMC)Fe] <sup>+</sup> | (No O <sub>2</sub> ) | 2                 | 3.09                                         | 12.89               | 2.99                 | 12.78                    |
|                           |                      | 4                 | <b>0.00</b>                                  | <b>0.00</b>         | <b>0.00</b>          | <b>0.00</b>              |
|                           |                      | 6                 | 31.66                                        | 27.29               | 27.46                | 23.38                    |
|                           | Side-on              | 2                 | -44.64                                       | -27.06              | -52.07               | -35.73                   |
|                           |                      | 4                 | <b>-47.35</b>                                | -37.17              | -52.58               | -43.69                   |
|                           |                      | 6                 | -46.97                                       | <b>-41.28</b>       | <b>-54.34</b>        | <b>-48.87</b>            |
|                           | End-on               | 2                 | -37.15                                       | -14.50              | -46.85               | -24.39                   |
|                           |                      | 4                 | Optimizes to side-on                         |                     | Optimizes to side-on |                          |
|                           |                      | 6                 | Optimizes to side-on                         |                     | -45.94               | -41.11                   |
| [(14-TMC)Co] <sup>+</sup> | (No O <sub>2</sub> ) | 1                 | <b>0.00</b>                                  | 7.53                | <b>0.00</b>          | 7.44                     |
|                           |                      | 3                 | 2.99                                         | <b>0.00</b>         | 3.15                 | <b>0.00</b>              |
|                           |                      | 5                 | 46.49                                        | 38.81               | 42.18                | 34.83                    |
|                           | Side-on              | 1                 | <b>-30.42</b>                                | -14.31              | <b>-37.96</b>        | -22.42                   |
|                           |                      | 3                 | -29.44 <sup>c</sup>                          | -19.84 <sup>c</sup> | -33.59 <sup>c</sup>  | -25.58 <sup>c</sup>      |
|                           |                      | 5                 | -26.54                                       | <b>-26.43</b>       | -31.42               | <b>-31.06</b>            |
|                           | End-on               | 1                 | -23.95                                       | -11.29              | -31.81               | -20.01                   |
|                           |                      | 3                 | -27.59                                       | -11.15              | -35.86               | -20.08                   |
|                           |                      | 5                 | -24.55                                       | -21.70              | -31.62               | -29.43                   |
| [(14-TMC)Ni] <sup>+</sup> | (No O <sub>2</sub> ) | 2                 | <b>0.00</b>                                  | <b>0.00</b>         | <b>0.00</b>          | <b>0.00</b>              |
|                           |                      | 4                 | 61.53                                        | 57.93               | 55.83                | 53.16                    |
|                           |                      | 6                 | -13.12                                       | -5.09               | -18.55               | -9.45                    |
|                           | Side-on              | 2                 | -13.19 <sup>f</sup>                          | -13.18 <sup>f</sup> | -16.98 <sup>f</sup>  | -18.14 <sup>f</sup>      |
|                           |                      | 4                 | -11.95                                       | -9.70               | -17.59               | -17.60                   |
|                           | End-on               | 2                 | -11.95                                       | -9.70               | -17.59               | -17.60                   |
|                           |                      | 4                 | <b>-17.08</b>                                | <b>-12.83</b>       | <b>-22.50</b>        | <b>-19.66</b>            |
| [(14-TMC)Cu] <sup>+</sup> | (No O <sub>2</sub> ) | 1                 | <b>0.00</b>                                  | <b>0.00</b>         | <b>0.00</b>          | <b>0.00</b>              |
|                           |                      | 3                 | 60.19                                        | 65.71               | 53.32                | 59.25                    |
|                           |                      | 5                 | -13.12                                       | -5.09               | -18.55               | -9.45                    |
|                           | Side-on              | 1                 | 0.58                                         | 7.18                | Optimizes to end-on  |                          |
|                           |                      | 3                 | Optimizes to end-on                          |                     | Optimizes to end-on  |                          |
|                           | End-on               | 1                 | -4.05                                        | 3.48                | -8.89                | -3.49                    |
|                           |                      | 3                 | <b>-8.74</b>                                 | <b>-1.73</b>        | <b>-12.25</b>        | <b>-5.57</b>             |

<sup>a</sup> In structures with O<sub>2</sub>, the energies are given as O<sub>2</sub> binding energies relative to the lowest O<sub>2</sub>-free structure, and the lowest energy in each category is marked in bold. <sup>b</sup> At the temperature where the experiments were done (10 K), this species is 0.49 kcal mol<sup>-1</sup> higher than the singlet; thus the spin state preference is changed. <sup>c</sup> This structure optimizes itself to a half side-on/end-on species. <sup>d</sup> Gas phase frequency calculation yield an imaginary frequency of *i*86.15 cm<sup>-1</sup>, indicating that this is in fact a transition state between two end-on structures. <sup>e</sup> At the temperature where the experiments were done (233 K), this species is 1.85 kcal mol<sup>-1</sup> higher than the triplet; thus the spin state preference is unchanged compared to 298 K. <sup>f</sup> Gas phase frequency calculation yield an imaginary frequency of *i*143.84 cm<sup>-1</sup>, indicating that this is in fact a transition state between two end-on structures.

**Table S2.** Electron Count Obtained From NBO Calculations at the BP86/Def2-TZVPP/GAS Level

|                       | Total Electron Count |         |                |         | Oxidation State<br>Assignment Based on                                    |                                                            |
|-----------------------|----------------------|---------|----------------|---------|---------------------------------------------------------------------------|------------------------------------------------------------|
|                       | Metal                |         | O <sub>2</sub> |         | Total Electron Count                                                      | Valence Orbital Analysis                                   |
|                       | $\alpha$             | $\beta$ | $\alpha$       | $\beta$ |                                                                           |                                                            |
| <b>1<sup>Cr</sup></b> | 12.92                | 10.14   | 8.50           | 8.28    | <sup>4</sup> Cr <sup>I</sup> + <sup>1</sup> O <sub>2</sub>                | <sup>4</sup> [Cr <sup>III</sup> –peroxo]                   |
| <b>1<sup>Mn</sup></b> | 13.65                | 9.93    | 8.47           | 8.35    | <sup>5</sup> Mn <sup>I</sup> + <sup>1</sup> O <sub>2</sub>                | <sup>5</sup> [Mn <sup>III</sup> –peroxo]                   |
| <b>1<sup>Fe</sup></b> | 14.09                | 10.40   | 8.94           | 7.91    | <sup>5</sup> Fe <sup>II</sup> + <sup>2</sup> O <sub>2</sub> <sup>•−</sup> | <sup>6</sup> [Fe <sup>II</sup> –superoxo]                  |
| <b>1<sup>Co</sup></b> | 12.97                | 12.97   | 8.44           | 8.44    | <sup>1</sup> Co <sup>I</sup> + <sup>1</sup> O <sub>2</sub>                | <sup>3</sup> [Co <sup>III</sup> –peroxo]                   |
| <b>1<sup>Ni</sup></b> | 13.76                | 12.96   | 8.35           | 8.44    | <sup>2</sup> Ni <sup>I</sup> + <sup>1</sup> O <sub>2</sub>                | <sup>2</sup> [Ni <sup>III</sup> –peroxo]                   |
| <b>1<sup>Cu</sup></b> | 14.09                | 13.76   | 8.96           | 7.44    | <sup>1</sup> Cu <sup>I</sup> + <sup>3</sup> O <sub>2</sub>                | <sup>1</sup> Cu <sup>I</sup> + <sup>3</sup> O <sub>2</sub> |
| <b>2<sup>Cr</sup></b> | 12.92                | 10.08   | 8.48           | 8.32    | <sup>4</sup> Cr <sup>I</sup> + <sup>1</sup> O <sub>2</sub>                | <sup>4</sup> [Cr <sup>III</sup> –peroxo]                   |
| <b>2<sup>Mn</sup></b> | 13.66                | 9.89    | 8.44           | 8.39    | <sup>5</sup> Mn <sup>I</sup> + <sup>1</sup> O <sub>2</sub>                | <sup>5</sup> [Mn <sup>III</sup> –peroxo]                   |
| <b>2<sup>Fe</sup></b> | 14.09                | 10.39   | 8.95           | 7.93    | <sup>5</sup> Fe <sup>II</sup> + <sup>2</sup> O <sub>2</sub> <sup>•−</sup> | <sup>6</sup> [Fe <sup>II</sup> –superoxo]                  |
| <b>2<sup>Co</sup></b> | 13.65                | 12.12   | 8.47           | 8.19    | <sup>3</sup> Co <sup>I</sup> + <sup>1</sup> O <sub>2</sub>                | <sup>3</sup> [Co <sup>III</sup> –peroxo]                   |
| <b>2<sup>Ni</sup></b> | 14.00                | 12.81   | 8.02           | 8.51    | <sup>2</sup> Ni <sup>I</sup> + <sup>1</sup> O <sub>2</sub>                | <sup>2</sup> [Ni <sup>III</sup> –peroxo]                   |
| <b>2<sup>Cu</sup></b> | 14.08                | 13.76   | 8.96           | 7.43    | <sup>1</sup> Cu <sup>I</sup> + <sup>3</sup> O <sub>2</sub>                | <sup>1</sup> Cu <sup>I</sup> + <sup>3</sup> O <sub>2</sub> |

**Table S3.** Mulliken Spin Density Distributions Calculated at the BP86/Def2-TZVPP/GAS Level

|                       |         | 2S+1 | M                    | O(1)  | O(2)  | 4 × N | Rest  |
|-----------------------|---------|------|----------------------|-------|-------|-------|-------|
| <b>1<sup>Cr</sup></b> | Side-on | 2    | 1.33                 | -0.13 | -0.13 | -0.12 | 0.05  |
|                       |         | 4    | 3.04                 | 0.06  | 0.06  | -0.23 | 0.06  |
|                       |         | 6    | 4.16                 | 0.46  | 0.46  | -0.16 | 0.09  |
|                       | End-on  | 2    | 1.31                 | -0.12 | -0.09 | -0.13 | 0.03  |
|                       |         | 4    | 3.73                 | -0.32 | -0.28 | -0.20 | 0.07  |
|                       |         | 6    | 4.22                 | 0.62  | 0.31  | -0.26 | 0.11  |
| <b>1<sup>Mn</sup></b> | Side-on | 1    | 0.20                 | -0.12 | -0.12 | 0.03  | 0.01  |
|                       |         | 3    | 2.05                 | 0.03  | 0.03  | -0.13 | 0.03  |
|                       |         | 5    | 3.89                 | 0.03  | 0.03  | -0.01 | 0.07  |
|                       |         | 7    | 4.73                 | 0.60  | 0.58  | 0.00  | 0.10  |
|                       | End-on  | 1    | 0.11                 | -0.04 | -0.05 | -0.03 | 0.01  |
|                       |         | 3    | 2.37                 | -0.18 | -0.12 | -0.12 | 0.05  |
|                       |         | 5    | Optimizes to side-on |       |       |       |       |
|                       |         | 7    | Optimizes to side-on |       |       |       |       |
| <b>1<sup>Fe</sup></b> | Side-on | 2    | 0.65                 | 0.21  | 0.21  | -0.07 | 0.00  |
|                       |         | 4    | 2.63                 | 0.11  | 0.11  | 0.10  | 0.04  |
|                       |         | 6    | 3.82                 | 0.49  | 0.49  | 0.11  | 0.08  |
|                       | End-on  | 2    | 0.95                 | 0.00  | 0.06  | -0.04 | 0.03  |
|                       |         | 4    | 2.81                 | 0.03  | 0.11  | 0.00  | 0.06  |
|                       |         | 6    | Optimizes to side-on |       |       |       |       |
| <b>1<sup>Co</sup></b> | Side-on | 1    | 0.00                 | 0.00  | 0.00  | 0.00  | 0.00  |
|                       |         | 3    | 1.43                 | 0.23  | 0.20  | 0.12  | 0.02  |
|                       |         | 5    | Optimizes to end-on  |       |       |       |       |
|                       | End-on  | 1    | -0.81                | 0.49  | 0.39  | -0.06 | -0.01 |
|                       |         | 3    | 1.35                 | 0.30  | 0.28  | 0.04  | 0.03  |
|                       |         | 5    | 2.53                 | 0.61  | 0.63  | 0.17  | 0.06  |
| <b>1<sup>Ni</sup></b> | Side-on | 2    | 0.81                 | -0.05 | -0.05 | 0.26  | 0.03  |
|                       |         | 4    | 1.39                 | 0.67  | 0.67  | 0.25  | 0.03  |
|                       | End-on  | 2    | 0.03                 | 0.56  | 0.45  | -0.05 | 0.01  |
|                       |         | 4    | 1.35                 | 0.72  | 0.64  | 0.24  | 0.05  |
| <b>1<sup>Cu</sup></b> | Side-on | 1    | 0.00                 | 0.00  | 0.00  | 0.00  | 0.00  |
|                       |         | 3    | TS                   |       |       |       |       |
|                       | End-on  | 1    | -0.27                | 0.26  | 0.15  | -0.12 | -0.02 |
|                       |         | 3    | 0.35                 | 0.81  | 0.69  | 0.13  | 0.02  |

**Table S3.** Mulliken Spin Density Distributions Calculated at the BP86/Def2-TZVPP/GAS Level (Continued)

|                 |         | 2S+1 | M                                            | O(1)  | O(2)  | 4 × N | Rest  |
|-----------------|---------|------|----------------------------------------------|-------|-------|-------|-------|
| $2^{\text{Cr}}$ | Side-on | 2    | 1.33                                         | -0.11 | -0.11 | -0.15 | 0.05  |
|                 |         | 4    | 3.14                                         | 0.04  | 0.04  | -0.26 | 0.05  |
|                 |         | 6    | Optimizes to half side-on/end-on, see end-on |       |       |       |       |
|                 | End-on  | 2    | 1.33                                         | -0.11 | -0.12 | -0.12 | 0.02  |
|                 |         | 4    | 3.76                                         | -0.27 | -0.34 | -0.21 | 0.06  |
|                 |         | 6    | 4.15                                         | 0.42  | 0.57  | -0.24 | 0.10  |
| $2^{\text{Mn}}$ | Side-on | 1    | 0.02                                         | 0.09  | -0.07 | -0.04 | 0.00  |
|                 |         | 3    | 2.20                                         | -0.03 | -0.01 | -0.18 | 0.02  |
|                 |         | 5    | 3.97                                         | -0.01 | -0.01 | -0.02 | 0.07  |
|                 |         | 7    | 4.74                                         | 0.59  | 0.59  | -0.03 | 0.11  |
|                 | End-on  | 1    | 0.10                                         | -0.06 | -0.04 | 0.00  | -0.01 |
|                 |         | 3    | Optimizes to side-on                         |       |       |       |       |
|                 |         | 5    | 4.40                                         | -0.12 | -0.34 | -0.02 | 0.08  |
|                 |         | 7    | Optimizes to side-on                         |       |       |       |       |
| $2^{\text{Fe}}$ | Side-on | 2    | 1.04                                         | 0.03  | 0.03  | -0.10 | 0.00  |
|                 |         | 4    | 2.73                                         | 0.08  | 0.04  | 0.10  | 0.05  |
|                 |         | 6    | 3.85                                         | 0.49  | 0.49  | 0.09  | 0.07  |
|                 | End-on  | 2    | 0.62                                         | 0.22  | 0.18  | -0.04 | 0.02  |
|                 |         | 4    | Optimizes to side-on                         |       |       |       |       |
|                 |         | 6    | Optimizes to side-on                         |       |       |       |       |
| $2^{\text{Co}}$ | Side-on | 1    | 0.03                                         | 0.00  | 0.00  | -0.02 | 0.00  |
|                 |         | 3    | 1.57                                         | 0.19  | 0.08  | 0.13  | 0.04  |
|                 |         | 5    | 2.58                                         | 0.62  | 0.62  | 0.13  | 0.06  |
|                 | End-on  | 1    | 0.72                                         | -0.33 | -0.41 | 0.01  | 0.01  |
|                 |         | 3    | 1.42                                         | 0.28  | 0.24  | 0.03  | 0.03  |
|                 |         | 5    | 2.52                                         | 0.59  | 0.68  | 0.14  | 0.06  |
| $2^{\text{Ni}}$ | Side-on | 2    | 0.85                                         | -0.07 | -0.07 | 0.25  | 0.05  |
|                 |         | 4    | TS                                           |       |       |       |       |
|                 | End-on  | 2    | 1.30                                         | -0.18 | -0.33 | 0.18  | 0.03  |
|                 |         | 4    | 1.35                                         | 0.66  | 0.72  | 0.20  | 0.06  |
| $2^{\text{Cu}}$ | Side-on | 1    | -0.02                                        | 0.03  | 0.00  | -0.01 | 0.00  |
|                 |         | 3    | Optimizes to end-on                          |       |       |       |       |
|                 | End-on  | 1    | 0.28                                         | -0.18 | -0.27 | 0.14  | 0.02  |
|                 |         | 3    | 0.32                                         | 0.70  | 0.82  | 0.12  | 0.03  |

**Table S4.** Mulliken Spin Density Distributions Calculated at the B3LYP//BP86/Def2-TZVPP/GAS Level

|                       |         | 2S+1 | M                    | O(1)  | O(2)  | 4 × N | Rest  |
|-----------------------|---------|------|----------------------|-------|-------|-------|-------|
| <b>1<sup>Cr</sup></b> | Side-on | 2    | 1.21                 | -0.09 | -0.09 | -0.07 | 0.04  |
|                       |         | 4    | 3.09                 | 0.02  | 0.02  | -0.18 | 0.05  |
|                       |         | 6    | 4.06                 | 0.48  | 0.48  | -0.11 | 0.09  |
|                       | End-on  | 2    | 1.64                 | -0.32 | -0.24 | -0.12 | 0.04  |
|                       |         | 4    | 3.88                 | -0.44 | -0.36 | -0.15 | 0.07  |
|                       |         | 6    | 4.12                 | 0.65  | 0.32  | -0.19 | 0.09  |
| <b>1<sup>Mn</sup></b> | Side-on | 1    | 0.05                 | -0.05 | -0.05 | 0.05  | -0.01 |
|                       |         | 3    | 2.14                 | -0.03 | -0.03 | -0.13 | 0.04  |
|                       |         | 5    | 4.10                 | -0.08 | -0.08 | 0.00  | 0.07  |
|                       |         | 7    | 4.75                 | 0.59  | 0.56  | 0.01  | 0.09  |
|                       | End-on  | 1    | 0.79                 | -0.46 | -0.29 | -0.07 | 0.03  |
|                       |         | 3    | 2.76                 | -0.43 | -0.27 | -0.13 | 0.06  |
|                       |         | 5    | Optimizes to side-on |       |       |       |       |
|                       |         | 7    | Optimizes to side-on |       |       |       |       |
| <b>1<sup>Fe</sup></b> | Side-on | 2    | 1.13                 | -0.03 | -0.03 | -0.09 | 0.02  |
|                       |         | 4    | 3.00                 | -0.06 | -0.06 | 0.08  | 0.03  |
|                       |         | 6    | 3.83                 | 0.51  | 0.51  | 0.09  | 0.05  |
|                       | End-on  | 2    | 1.85                 | -0.55 | -0.27 | -0.06 | 0.03  |
|                       |         | 4    | 3.58                 | -0.52 | -0.16 | 0.05  | 0.05  |
|                       |         | 6    | Optimizes to side-on |       |       |       |       |
| <b>1<sup>Co</sup></b> | Side-on | 1    | 0.00                 | 0.00  | 0.00  | 0.00  | 0.00  |
|                       |         | 3    | 1.94                 | 0.00  | -0.04 | 0.09  | 0.01  |
|                       |         | 5    | Optimizes to end-on  |       |       |       |       |
|                       | End-on  | 1    | -1.05                | 0.62  | 0.44  | -0.01 | -0.01 |
|                       |         | 3    | 1.08                 | 0.54  | 0.35  | 0.00  | 0.02  |
|                       |         | 5    | 2.61                 | 0.60  | 0.64  | 0.12  | 0.03  |
| <b>1<sup>Ni</sup></b> | Side-on | 2    | 1.25                 | -0.24 | -0.24 | 0.21  | 0.01  |
|                       |         | 4    | 1.52                 | 0.64  | 0.64  | 0.20  | 0.00  |
|                       | End-on  | 2    | -0.18                | 0.68  | 0.53  | -0.05 | 0.02  |
|                       |         | 4    | 1.50                 | 0.71  | 0.59  | 0.18  | 0.03  |
| <b>1<sup>Cu</sup></b> | Side-on | 1    | 0.00                 | 0.00  | 0.00  | 0.00  | 0.00  |
|                       |         | 3    | TS                   |       |       |       |       |
|                       | End-on  | 1    | -0.40                | 0.41  | 0.15  | -0.15 | -0.01 |
|                       |         | 3    | 0.35                 | 0.82  | 0.70  | 0.12  | 0.01  |

**Table S4.** Mulliken Spin Density Distributions Calculated at the B3LYP//BP86/Def2-TZVPP/GAS Level (Continued)

|                 |         | 2S+1 | M                                            | O(1)  | O(2)  | 4 × N | Rest  |
|-----------------|---------|------|----------------------------------------------|-------|-------|-------|-------|
| $2^{\text{Cr}}$ | Side-on | 2    | 1.14                                         | -0.05 | -0.05 | -0.07 | 0.02  |
|                 |         | 4    | 3.17                                         | -0.01 | -0.01 | -0.19 | 0.04  |
|                 |         | 6    | Optimizes to half side-on/end-on, see end-on |       |       |       |       |
|                 | End-on  | 2    | 1.60                                         | -0.26 | -0.27 | -0.10 | 0.02  |
|                 |         | 4    | 3.89                                         | -0.34 | -0.45 | -0.16 | 0.06  |
|                 |         | 6    | 4.05                                         | 0.43  | 0.60  | -0.17 | 0.09  |
| $2^{\text{Mn}}$ | Side-on | 1    | -0.02                                        | 0.07  | -0.03 | -0.03 | 0.00  |
|                 |         | 3    | 2.25                                         | -0.07 | -0.06 | -0.15 | 0.03  |
|                 |         | 5    | 4.19                                         | -0.12 | -0.13 | -0.01 | 0.06  |
|                 |         | 7    | 4.76                                         | 0.57  | 0.57  | 0.00  | 0.09  |
|                 | End-on  | 1    | 0.87                                         | -0.36 | -0.45 | -0.06 | 0.00  |
|                 |         | 3    | Optimizes to side-on                         |       |       |       |       |
|                 |         | 5    | 4.71                                         | -0.24 | -0.55 | -0.01 | 0.09  |
|                 |         | 7    | Optimizes to side-on                         |       |       |       |       |
| $2^{\text{Fe}}$ | Side-on | 2    | 1.23                                         | -0.08 | -0.08 | -0.09 | 0.01  |
|                 |         | 4    | 3.24                                         | -0.11 | -0.22 | 0.05  | 0.04  |
|                 |         | 6    | 3.85                                         | 0.51  | 0.51  | 0.08  | 0.04  |
|                 | End-on  | 2    | 1.71                                         | -0.14 | -0.47 | -0.12 | 0.02  |
|                 |         | 4    | Optimizes to side-on                         |       |       |       |       |
|                 |         | 6    | Optimizes to side-on                         |       |       |       |       |
| $2^{\text{Co}}$ | Side-on | 1    | -0.05                                        | 0.06  | 0.06  | -0.05 | -0.01 |
|                 |         | 3    | 2.29                                         | -0.16 | -0.27 | 0.10  | 0.03  |
|                 |         | 5    | 2.61                                         | 0.63  | 0.63  | 0.09  | 0.03  |
|                 | End-on  | 1    | 1.03                                         | -0.39 | -0.59 | -0.05 | -0.01 |
|                 |         | 3    | 1.01                                         | 0.43  | 0.57  | -0.03 | 0.02  |
|                 |         | 5    | 2.63                                         | 0.55  | 0.68  | 0.10  | 0.04  |
| $2^{\text{Ni}}$ | Side-on | 2    | 1.37                                         | -0.29 | -0.29 | 0.19  | 0.02  |
|                 |         | 4    | TS                                           |       |       |       |       |
|                 | End-on  | 2    | 1.56                                         | -0.21 | -0.50 | 0.15  | 0.01  |
|                 |         | 4    | 1.49                                         | 0.62  | 0.71  | 0.15  | 0.03  |
| $2^{\text{Cu}}$ | Side-on | 1    | -0.47                                        | 0.29  | 0.26  | -0.09 | 0.00  |
|                 |         | 3    | Optimizes to side-on                         |       |       |       |       |
|                 | End-on  | 1    | 0.39                                         | -0.17 | -0.38 | 0.16  | 0.01  |
|                 |         | 3    | 0.32                                         | 0.73  | 0.83  | 0.11  | 0.02  |

**Table S5.** Mulliken Spin Density Distributions Calculated at the BP86/Def2-TZVPP/COSMO Level

|                       |         | 2S+1 | M                    | O(1)  | O(2)  | 4 × N | Rest  |
|-----------------------|---------|------|----------------------|-------|-------|-------|-------|
| <b>1<sup>Cr</sup></b> | Side-on | 2    | 1.25                 | -0.09 | -0.10 | -0.11 | 0.04  |
|                       |         | 4    | 3.13                 | 0.03  | 0.04  | -0.26 | 0.05  |
|                       |         | 6    | 4.15                 | 0.47  | 0.47  | -0.17 | 0.09  |
|                       | End-on  | 2    | 1.21                 | -0.04 | -0.07 | -0.12 | 0.02  |
|                       |         | 4    | 3.51                 | -0.15 | -0.18 | -0.23 | 0.06  |
|                       |         | 6    | 4.23                 | 0.60  | 0.35  | -0.28 | 0.10  |
| <b>1<sup>Mn</sup></b> | Side-on | 1    | 0.05                 | -0.05 | -0.05 | 0.05  | 0.00  |
|                       |         | 3    | 2.11                 | 0.01  | 0.01  | -0.17 | 0.04  |
|                       |         | 5    | 3.92                 | 0.01  | 0.01  | -0.01 | 0.07  |
|                       |         | 7    | 4.77                 | 0.57  | 0.56  | 0.00  | 0.10  |
|                       | End-on  | 1    | 0.10                 | -0.03 | -0.04 | -0.03 | 0.01  |
|                       |         | 3    | 2.18                 | -0.05 | -0.03 | -0.15 | 0.04  |
|                       |         | 5    | Optimizes to side-on |       |       |       |       |
|                       |         | 7    | Optimizes to side-on |       |       |       |       |
| <b>1<sup>Fe</sup></b> | Side-on | 2    | 0.85                 | 0.11  | 0.11  | -0.09 | 0.01  |
|                       |         | 4    | 2.68                 | 0.08  | 0.08  | 0.11  | 0.04  |
|                       |         | 6    | 3.91                 | 0.42  | 0.42  | 0.16  | 0.09  |
|                       | End-on  | 2    | 0.85                 | 0.06  | 0.11  | -0.05 | 0.02  |
|                       |         | 4    | 2.71                 | 0.10  | 0.15  | -0.02 | 0.06  |
|                       |         | 6    | Optimizes to side-on |       |       |       |       |
| <b>1<sup>Co</sup></b> | Side-on | 1    | 0.00                 | 0.00  | 0.00  | 0.00  | 0.00  |
|                       |         | 3    | 1.50                 | 0.23  | 0.08  | 0.15  | 0.03  |
|                       |         | 5    | 2.63                 | 0.55  | 0.55  | 0.20  | 0.06  |
|                       | End-on  | 1    | -0.62                | 0.37  | 0.33  | -0.06 | -0.02 |
|                       |         | 3    | 1.35                 | 0.28  | 0.29  | 0.04  | 0.04  |
|                       |         | 5    | 2.60                 | 0.56  | 0.55  | 0.23  | 0.07  |
| <b>1<sup>Ni</sup></b> | Side-on | 2    | 0.78                 | -0.05 | -0.05 | 0.28  | 0.03  |
|                       |         | 4    | 1.43                 | 0.62  | 0.62  | 0.28  | 0.04  |
|                       | End-on  | 2    | 0.44                 | 0.24  | 0.21  | 0.10  | 0.01  |
|                       |         | 4    | 1.42                 | 0.62  | 0.61  | 0.29  | 0.06  |
| <b>1<sup>Cu</sup></b> | Side-on | 1    | 0.00                 | 0.01  | -0.01 | 0.00  | 0.00  |
|                       |         | 3    | TS                   |       |       |       |       |
|                       | End-on  | 1    | -0.31                | 0.33  | 0.21  | -0.20 | -0.03 |
|                       |         | 3    | 0.40                 | 0.72  | 0.65  | 0.21  | 0.03  |

**Table S5.** Mulliken Spin Density Distributions Calculated at the BP86/Def2-TZVPP/COSMO Level (Continued)

|                 |         | 2S+1 | M                    | O(1)  | O(2)  | 4 × N | Rest  |
|-----------------|---------|------|----------------------|-------|-------|-------|-------|
| $2^{\text{Cr}}$ | Side-on | 2    | 1.25                 | -0.07 | -0.08 | -0.13 | 0.04  |
|                 |         | 4    | 3.20                 | 0.02  | 0.02  | -0.27 | 0.04  |
|                 |         | 6    | Optimizes to end-on  |       |       |       |       |
|                 | End-on  | 2    | 1.23                 | -0.09 | -0.04 | -0.11 | 0.01  |
|                 |         | 4    | Optimizes to side-on |       |       |       |       |
|                 |         | 6    | 4.17                 | 0.57  | 0.48  | -0.32 | 0.09  |
| $2^{\text{Mn}}$ | Side-on | 1    | 0.02                 | 0.07  | -0.04 | -0.04 | -0.01 |
|                 |         | 3    | 2.21                 | -0.02 | -0.01 | -0.19 | 0.02  |
|                 |         | 5    | 3.98                 | -0.02 | -0.02 | -0.02 | 0.07  |
|                 |         | 7    | 4.78                 | 0.57  | 0.57  | -0.02 | 0.11  |
|                 | End-on  | 1    | 0.05                 | -0.04 | -0.01 | 0.01  | -0.01 |
|                 |         | 3    | Optimizes to side-on |       |       |       |       |
|                 |         | 5    | 4.27                 | -0.08 | -0.21 | -0.05 | 0.07  |
|                 |         | 7    | Optimizes to side-on |       |       |       |       |
| $2^{\text{Fe}}$ | Side-on | 2    | 1.09                 | 0.01  | 0.01  | -0.10 | 0.00  |
|                 |         | 4    | 2.79                 | 0.06  | -0.01 | 0.10  | 0.06  |
|                 |         | 6    | 3.91                 | 0.43  | 0.43  | 0.13  | 0.08  |
|                 | End-on  | 2    | 0.73                 | 0.19  | 0.12  | -0.05 | 0.02  |
|                 |         | 4    | Optimizes to side-on |       |       |       |       |
|                 |         | 6    | 3.82                 | 0.49  | 0.46  | 0.14  | 0.08  |
| $2^{\text{Co}}$ | Side-on | 1    | 0.00                 | 0.00  | 0.00  | 0.00  | 0.00  |
|                 |         | 3    | 1.64                 | 0.15  | 0.01  | 0.15  | 0.05  |
|                 |         | 5    | 2.63                 | 0.57  | 0.57  | 0.16  | 0.06  |
|                 | End-on  | 1    | 0.53                 | -0.24 | -0.27 | -0.03 | 0.00  |
|                 |         | 3    | 1.33                 | 0.37  | 0.29  | -0.01 | 0.02  |
|                 |         | 5    | 2.60                 | 0.57  | 0.57  | 0.19  | 0.07  |
| $2^{\text{Ni}}$ | Side-on | 2    | 0.80                 | -0.06 | -0.06 | 0.27  | 0.05  |
|                 |         | 4    | 1.40                 | 0.65  | 0.65  | 0.24  | 0.06  |
|                 | End-on  | 2    | 1.33                 | -0.21 | -0.36 | 0.21  | 0.03  |
|                 |         | 4    | 1.42                 | 0.64  | 0.64  | 0.24  | 0.06  |
| $2^{\text{Cu}}$ | Side-on | 1    | Optimizes to end-on  |       |       |       |       |
|                 |         | 3    | Optimizes to end-on  |       |       |       |       |
|                 | End-on  | 1    | 0.35                 | -0.28 | -0.37 | 0.25  | 0.04  |
|                 |         | 3    | 0.36                 | 0.66  | 0.72  | 0.21  | 0.05  |

**Table S6.** Mulliken Spin Density Distributions Calculated at the B3LYP/COSMO//BP86/Def2-TZVPP/COSMO Level

|                       |         | 2S+1 | M                    | O(1)  | O(2)  | 4 × N | Rest  |
|-----------------------|---------|------|----------------------|-------|-------|-------|-------|
| <b>1<sup>Cr</sup></b> | Side-on | 2    | 1.10                 | 0.07  | -0.11 | -0.09 | 0.03  |
|                       |         | 4    | 3.14                 | 0.01  | 0.01  | -0.20 | 0.05  |
|                       |         | 6    | 4.05                 | 0.49  | 0.49  | -0.12 | 0.08  |
|                       | End-on  | 2    | 1.24                 | -0.05 | -0.11 | -0.10 | 0.03  |
|                       |         | 4    | 3.57                 | -0.19 | -0.24 | -0.20 | 0.06  |
|                       |         | 6    | 4.12                 | 0.62  | 0.36  | -0.20 | 0.09  |
| <b>1<sup>Mn</sup></b> | Side-on | 1    | 0.01                 | -0.02 | -0.03 | 0.05  | -0.01 |
|                       |         | 3    | 2.15                 | -0.02 | -0.02 | -0.15 | 0.04  |
|                       |         | 5    | 4.09                 | -0.08 | -0.08 | 0.00  | 0.07  |
|                       |         | 7    | 4.78                 | 0.56  | 0.55  | 0.01  | 0.10  |
|                       | End-on  | 1    | 0.16                 | -0.05 | -0.09 | -0.04 | 0.01  |
|                       |         | 3    | 2.46                 | -0.19 | -0.16 | -0.15 | 0.05  |
|                       |         | 5    | Optimizes to side-on |       |       |       |       |
|                       |         | 7    | Optimizes to side-on |       |       |       |       |
| <b>1<sup>Fe</sup></b> | Side-on | 2    | 1.12                 | -0.02 | -0.02 | -0.10 | 0.02  |
|                       |         | 4    | 3.00                 | -0.06 | -0.06 | 0.09  | 0.04  |
|                       |         | 6    | 3.97                 | 0.41  | 0.41  | 0.15  | 0.06  |
|                       | End-on  | 2    | 0.38                 | 0.30  | 0.31  | -0.02 | 0.02  |
|                       |         | 4    | 3.50                 | -0.41 | -0.18 | 0.04  | 0.05  |
|                       |         | 6    | Optimizes to side-on |       |       |       |       |
| <b>1<sup>Co</sup></b> | Side-on | 1    | 0.00                 | 0.00  | 0.00  | 0.00  | 0.00  |
|                       |         | 3    | 2.11                 | -0.06 | -0.24 | 0.15  | 0.03  |
|                       |         | 5    | 2.67                 | 0.57  | 0.57  | 0.15  | 0.03  |
|                       | End-on  | 1    | -0.94                | 0.53  | 0.42  | 0.00  | -0.01 |
|                       |         | 3    | 1.11                 | 0.48  | 0.39  | 0.00  | 0.02  |
|                       |         | 5    | 2.70                 | 0.53  | 0.58  | 0.15  | 0.04  |
| <b>1<sup>Ni</sup></b> | Side-on | 2    | 1.19                 | -0.22 | -0.22 | 0.23  | 0.01  |
|                       |         | 4    | 1.57                 | 0.60  | 0.60  | 0.22  | 0.01  |
|                       | End-on  | 2    | 0.07                 | 0.53  | 0.33  | 0.08  | -0.01 |
|                       |         | 4    | 1.58                 | 0.61  | 0.54  | 0.23  | 0.04  |
| <b>1<sup>Cu</sup></b> | Side-on | 1    | -0.55                | 0.35  | 0.35  | -0.14 | -0.01 |
|                       |         | 3    | TS                   |       |       |       |       |
|                       | End-on  | 1    | -0.51                | 0.51  | 0.26  | -0.25 | -0.01 |
|                       |         | 3    | 0.46                 | 0.70  | 0.62  | 0.21  | 0.01  |

**Table S6.** Mulliken Spin Density Distributions Calculated at the B3LYP/COSMO//BP86/Def2-TZVPP/COSMO Level (Continued)

|                 |         | 2S+1 | M                    | O(1)  | O(2)  | $4 \times N$ | Rest  |
|-----------------|---------|------|----------------------|-------|-------|--------------|-------|
| $2^{\text{Cr}}$ | Side-on | 2    | 1.10                 | -0.02 | -0.04 | -0.06        | 0.01  |
|                 |         | 4    | 3.19                 | -0.02 | -0.02 | -0.20        | 0.04  |
|                 |         | 6    | Optimizes to end-on  |       |       |              |       |
|                 | End-on  | 2    | 1.22                 | -0.12 | -0.04 | -0.08        | 0.01  |
|                 |         | 4    | Optimizes to side-on |       |       |              |       |
|                 |         | 6    | 4.09                 | 0.57  | 0.48  | -0.23        | 0.08  |
| $2^{\text{Mn}}$ | Side-on | 1    | -0.02                | 0.05  | -0.01 | -0.03        | 0.00  |
|                 |         | 3    | 2.23                 | -0.05 | -0.05 | -0.16        | 0.02  |
|                 |         | 5    | 4.17                 | -0.12 | -0.12 | -0.01        | 0.07  |
|                 |         | 7    | 4.79                 | 0.56  | 0.56  | 0.00         | 0.09  |
|                 | End-on  | 1    | 0.05                 | -0.06 | -0.01 | 0.02         | -0.01 |
|                 |         | 3    | Optimizes to side-on |       |       |              |       |
|                 |         | 5    | 4.64                 | -0.26 | -0.46 | 0.00         | 0.09  |
| $2^{\text{Fe}}$ | Side-on | 2    | 1.20                 | -0.06 | -0.06 | -0.09        | 0.01  |
|                 |         | 4    | 3.20                 | -0.10 | -0.20 | 0.05         | 0.04  |
|                 |         | 6    | 3.98                 | 0.42  | 0.42  | 0.13         | 0.05  |
|                 | End-on  | 2    | 1.62                 | -0.17 | -0.35 | -0.12        | 0.02  |
|                 |         | 4    | Optimizes to side-on |       |       |              |       |
|                 |         | 6    | 3.84                 | 0.49  | 0.49  | 0.10         | 0.07  |
| $2^{\text{Co}}$ | Side-on | 1    | 0.00                 | 0.00  | 0.00  | 0.00         | 0.00  |
|                 |         | 3    | 2.27                 | -0.15 | -0.26 | 0.12         | 0.03  |
|                 |         | 5    | 2.66                 | 0.60  | 0.60  | 0.11         | 0.03  |
|                 | End-on  | 1    | 0.97                 | -0.36 | -0.51 | -0.08        | -0.01 |
|                 |         | 3    | 1.09                 | 0.47  | 0.47  | -0.05        | 0.02  |
|                 |         | 5    | 2.70                 | 0.53  | 0.59  | 0.13         | 0.04  |
| $2^{\text{Ni}}$ | Side-on | 2    | 1.29                 | -0.26 | -0.26 | 0.20         | 0.03  |
|                 |         | 4    | 1.55                 | 0.62  | 0.62  | 0.18         | 0.02  |
|                 | End-on  | 2    | 1.64                 | -0.29 | -0.53 | 0.17         | 0.01  |
|                 |         | 4    | 1.57                 | 0.58  | 0.62  | 0.18         | 0.04  |
| $2^{\text{Cu}}$ | Side-on | 1    | Optimizes to end-on  |       |       |              |       |
|                 |         | 3    | Optimizes to end-on  |       |       |              |       |
|                 | End-on  | 1    | 0.53                 | -0.35 | -0.50 | 0.31         | 0.01  |
|                 |         | 3    | 0.42                 | 0.62  | 0.69  | 0.23         | 0.04  |

**Table S7.** Selected Geometries Calculated at the BP86/Def2-TZVPP/GAS Level in Å

|                       |         | 2S+1 | M-O(1)               | M-O(2) | O-O  | Avg(M-N) | A[M-O-O] <sup>a</sup> | A[N-M-O] <sup>a</sup> | A[N-M-N] <sup>b</sup> |
|-----------------------|---------|------|----------------------|--------|------|----------|-----------------------|-----------------------|-----------------------|
| <b>1<sup>Cr</sup></b> | Side-on | 2    | 1.86                 | 1.86   | 1.44 | 2.16     | 67.27                 | 147.61                | 110.47                |
|                       |         | 4    | 1.86                 | 1.85   | 1.46 | 2.16     | 66.90                 | 148.00                | 110.43                |
|                       |         | 6    | 2.02                 | 2.02   | 1.33 | 2.34     | 70.90                 | 149.08                | 100.41                |
|                       | End-on  | 2    | 2.87                 | 1.70   | 1.33 | 2.15     | 142.49                | 151.03                | 110.70                |
|                       |         | 4    | 2.69                 | 1.78   | 1.35 | 2.23     | 117.46                | 155.58                | 105.65                |
|                       |         | 6    | 2.69                 | 1.98   | 1.33 | 2.25     | 107.11                | 161.27                | 106.95                |
| <b>1<sup>Mn</sup></b> | Side-on | 1    | 1.84                 | 1.84   | 1.43 | 2.13     | 67.17                 | 146.78                | 110.11                |
|                       |         | 3    | 1.85                 | 1.85   | 1.45 | 2.12     | 66.95                 | 146.54                | 110.90                |
|                       |         | 5    | 1.84                 | 1.84   | 1.43 | 2.26     | 67.22                 | 150.14                | 105.53                |
|                       |         | 7    | 2.14                 | 2.10   | 1.35 | 2.30     | 73.23                 | 152.50                | 105.31                |
|                       | End-on  | 1    | 2.83                 | 1.70   | 1.33 | 2.11     | 137.70                | 150.88                | 112.75                |
|                       |         | 3    | 2.70                 | 1.74   | 1.34 | 2.15     | 121.10                | 152.72                | 109.36                |
|                       |         | 5    | Optimizes to side-on |        |      |          |                       |                       |                       |
|                       |         | 7    | Optimizes to side-on |        |      |          |                       |                       |                       |
| <b>1<sup>Fe</sup></b> | Side-on | 2    | 1.85                 | 1.86   | 1.38 | 2.08     | 68.32                 | 146.13                | 111.25                |
|                       |         | 4    | 1.83                 | 1.83   | 1.40 | 2.22     | 67.52                 | 149.89                | 105.57                |
|                       |         | 6    | 1.93                 | 1.91   | 1.42 | 2.25     | 69.17                 | 152.82                | 107.03                |
|                       | End-on  | 2    | 2.77                 | 1.72   | 1.33 | 2.09     | 130.68                | 151.37                | 112.00                |
|                       |         | 4    | 2.79                 | 1.77   | 1.32 | 2.18     | 128.35                | 156.10                | 109.12                |
|                       |         | 6    | Optimizes to side-on |        |      |          |                       |                       |                       |
| <b>1<sup>Co</sup></b> | Side-on | 1    | 1.87                 | 1.87   | 1.42 | 2.04     | 67.70                 | 145.32                | 113.97                |
|                       |         | 3    | 1.83                 | 1.86   | 1.35 | 2.18     | 69.66                 | 147.81                | 107.84                |
|                       |         | 5    | Optimizes to end-on  |        |      |          |                       |                       |                       |
|                       | End-on  | 1    | 2.76                 | 1.79   | 1.31 | 2.11     | 125.15                | 155.79                | 111.69                |
|                       |         | 3    | 2.76                 | 1.78   | 1.31 | 2.12     | 126.04                | 156.28                | 112.93                |
|                       |         | 5    | 1.86                 | 2.38   | 1.33 | 2.18     | 94.57                 | 156.68                | 111.15                |
| <b>1<sup>Ni</sup></b> | Side-on | 2    | 1.87                 | 1.87   | 1.38 | 2.13     | 68.39                 | 145.87                | 111.45                |
|                       |         | 4    | 2.04                 | 2.04   | 1.32 | 2.15     | 71.09                 | 142.64                | 112.55                |
|                       | End-on  | 2    | 2.77                 | 1.82   | 1.30 | 2.15     | 124.51                | 160.12                | 112.15                |
|                       |         | 4    | 2.88                 | 1.90   | 1.29 | 2.14     | 127.64                | 148.81                | 117.24                |
| <b>1<sup>Cu</sup></b> | Side-on | 1    | 1.96                 | 1.96   | 1.32 | 2.23     | 70.31                 | 145.28                | 108.87                |
|                       |         | 3    | TS                   |        |      |          |                       |                       |                       |
|                       | End-on  | 1    | 2.84                 | 1.95   | 1.28 | 2.20     | 121.81                | 146.07                | 111.42                |
|                       |         | 3    | 2.85                 | 1.95   | 1.28 | 2.20     | 122.85                | 142.00                | 111.42                |

**Table S7.** Selected Geometries Calculated at the BP86/Def2-TZVPP/GAS Level in Å (Continued)

|                       |         | 2S+1 | M-O(1)                                       | M-O(2) | O-O  | Avg(M-N) | A[M-O-O] <sup>a</sup> | A[N-M-O] <sup>a</sup> | A[N-M-N] <sup>b</sup> |
|-----------------------|---------|------|----------------------------------------------|--------|------|----------|-----------------------|-----------------------|-----------------------|
| <b>2<sup>Cr</sup></b> | Side-on | 2    | 1.87                                         | 1.87   | 1.42 | 2.21     | 67.59                 | 135.49                | 134.06                |
|                       |         | 4    | 1.87                                         | 1.87   | 1.44 | 2.21     | 67.36                 | 135.79                | 133.92                |
|                       |         | 6    | Optimizes to half side-on/end-on, see end-on |        |      |          |                       |                       |                       |
|                       | End-on  | 2    | 1.72                                         | 2.83   | 1.34 | 2.18     | 135.20                | 127.96                | 141.45                |
|                       |         | 4    | 1.80                                         | 2.79   | 1.34 | 2.25     | 124.30                | 133.38                | 133.76                |
|                       |         | 6    | 2.03                                         | 2.27   | 1.34 | 2.30     | 81.90                 | 144.07                | 135.13                |
| <b>2<sup>Mn</sup></b> | Side-on | 1    | 1.88                                         | 1.83   | 1.43 | 2.18     | 69.20                 | 134.52                | 133.51                |
|                       |         | 3    | 1.88                                         | 1.86   | 1.43 | 2.17     | 68.07                 | 134.98                | 134.03                |
|                       |         | 5    | 1.85                                         | 1.85   | 1.42 | 2.31     | 67.52                 | 138.85                | 127.52                |
|                       |         | 7    | 2.15                                         | 2.14   | 1.35 | 2.32     | 71.74                 | 131.06                | 133.86                |
|                       | End-on  | 1    | 1.72                                         | 2.75   | 1.34 | 2.14     | 127.38                | 122.72                | 147.62                |
|                       |         | 3    | Optimizes to side-on                         |        |      |          |                       |                       |                       |
|                       |         | 5    | 1.84                                         | 2.80   | 1.34 | 2.28     | 122.27                | 134.98                | 135.49                |
|                       |         | 7    | Optimizes to side-on                         |        |      |          |                       |                       |                       |
| <b>2<sup>Fe</sup></b> | Side-on | 2    | 1.88                                         | 1.88   | 1.39 | 2.14     | 68.25                 | 133.60                | 135.77                |
|                       |         | 4    | 1.83                                         | 1.86   | 1.40 | 2.28     | 69.06                 | 139.89                | 125.23                |
|                       |         | 6    | 1.94                                         | 1.94   | 1.41 | 2.28     | 68.76                 | 134.60                | 133.31                |
|                       | End-on  | 2    | 1.78                                         | 2.71   | 1.33 | 2.11     | 120.99                | 118.60                | 154.07                |
|                       |         | 4    | Optimizes to side-on                         |        |      |          |                       |                       |                       |
|                       |         | 6    | Optimizes to side-on                         |        |      |          |                       |                       |                       |
| <b>2<sup>Co</sup></b> | Side-on | 1    | 1.89                                         | 1.89   | 1.40 | 2.12     | 68.28                 | 135.32                | 133.00                |
|                       |         | 3    | 1.81                                         | 1.92   | 1.35 | 2.24     | 73.13                 | 138.35                | 126.36                |
|                       |         | 5    | 2.01                                         | 2.04   | 1.34 | 2.23     | 72.02                 | 129.47                | 140.02                |
|                       | End-on  | 1    | 1.83                                         | 2.79   | 1.31 | 2.15     | 124.76                | 126.85                | 144.30                |
|                       |         | 3    | 1.80                                         | 2.77   | 1.31 | 2.16     | 125.02                | 127.34                | 143.46                |
|                       |         | 5    | 1.88                                         | 2.85   | 1.31 | 2.21     | 126.10                | 125.13                | 137.83                |
| <b>2<sup>Ni</sup></b> | Side-on | 2    | 1.91                                         | 1.91   | 1.36 | 2.20     | 69.18                 | 135.49                | 130.99                |
|                       |         | 4    | TS                                           |        |      |          |                       |                       |                       |
|                       | End-on  | 2    | 1.97                                         | 2.84   | 1.30 | 2.17     | 119.29                | 119.42                | 150.00                |
|                       |         | 4    | 1.95                                         | 2.85   | 1.29 | 2.17     | 121.93                | 120.20                | 149.08                |
| <b>2<sup>Cu</sup></b> | Side-on | 1    | 2.04                                         | 1.99   | 1.31 | 2.29     | 73.02                 | 135.19                | 130.12                |
|                       |         | 3    | Optimizes to end-on                          |        |      |          |                       |                       |                       |
|                       | End-on  | 1    | 2.04                                         | 2.93   | 1.28 | 2.22     | 122.37                | 124.67                | 141.02                |
|                       |         | 3    | 2.03                                         | 2.94   | 1.27 | 2.23     | 123.73                | 124.04                | 140.57                |

<sup>a</sup> Largest bond angle (A). <sup>b</sup> Smallest bond angle where N opposes each other.

**Table S8.** Selected Geometries Calculated at the BP86/Def2-TZVPP/COSMO Level in Å

|                       |         | 2S+1 | M-O(1) | M-O(2) | O-O  | Avg(M-N) | A[M-O-O] <sup>a</sup> | A[N-M-O] <sup>a</sup> | A[N-M-N] <sup>b</sup> |
|-----------------------|---------|------|--------|--------|------|----------|-----------------------|-----------------------|-----------------------|
| <b>1<sup>Cr</sup></b> | Side-on | 2    | 1.88   | 1.88   | 1.45 | 2.15     | 67.24                 | 148.34                | 109.11                |
|                       |         | 4    | 1.88   | 1.88   | 1.47 | 2.16     | 67.02                 | 148.58                | 109.01                |
|                       |         | 6    | 2.05   | 2.05   | 1.33 | 2.33     | 71.11                 | 148.98                | 100.29                |
|                       | End-on  | 2    | 2.92   | 1.72   | 1.37 | 2.14     | 142.40                | 148.84                | 109.85                |
|                       |         | 4    | 2.79   | 1.79   | 1.39 | 2.18     | 122.65                | 151.44                | 106.15                |
|                       |         | 6    | 2.86   | 2.04   | 1.34 | 2.21     | 114.30                | 158.31                | 108.43                |
| <b>1<sup>Mn</sup></b> | Side-on | 1    | 1.86   | 1.86   | 1.46 | 2.12     | 67.02                 | 146.88                | 109.65                |
|                       |         | 3    | 1.87   | 1.87   | 1.47 | 2.11     | 67.00                 | 147.48                | 109.95                |
|                       |         | 5    | 1.86   | 1.86   | 1.44 | 2.25     | 67.19                 | 150.50                | 105.04                |
|                       |         | 7    | 2.19   | 2.15   | 1.35 | 2.28     | 73.46                 | 148.68                | 106.60                |
|                       | End-on  | 1    | 2.88   | 1.71   | 1.37 | 2.09     | 138.26                | 149.99                | 111.91                |
|                       |         | 3    | 2.79   | 1.75   | 1.38 | 2.12     | 125.59                | 150.97                | 109.58                |
|                       |         | 5    |        |        |      |          | Optimizes to side-on  |                       |                       |
|                       |         | 7    |        |        |      |          | Optimizes to side-on  |                       |                       |
| <b>1<sup>Fe</sup></b> | Side-on | 2    | 1.87   | 1.87   | 1.41 | 2.07     | 68.01                 | 146.21                | 111.38                |
|                       |         | 4    | 1.84   | 1.84   | 1.42 | 2.21     | 67.35                 | 150.49                | 104.61                |
|                       |         | 6    | 1.94   | 1.93   | 1.44 | 2.24     | 68.32                 | 149.29                | 107.12                |
|                       | End-on  | 2    | 2.83   | 1.73   | 1.36 | 2.07     | 131.77                | 150.58                | 111.48                |
|                       |         | 4    | 2.84   | 1.78   | 1.36 | 2.15     | 129.87                | 154.97                | 109.12                |
|                       |         | 6    |        |        |      |          | Optimizes to side-on  |                       |                       |
| <b>1<sup>Co</sup></b> | Side-on | 1    | 1.88   | 1.88   | 1.43 | 2.04     | 67.64                 | 146.31                | 112.10                |
|                       |         | 3    | 1.78   | 1.95   | 1.38 | 2.17     | 75.16                 | 150.51                | 107.02                |
|                       |         | 5    | 2.01   | 2.01   | 1.36 | 2.17     | 70.17                 | 142.10                | 115.51                |
|                       | End-on  | 1    | 2.81   | 1.79   | 1.34 | 2.09     | 126.37                | 154.64                | 111.19                |
|                       |         | 3    | 2.80   | 1.78   | 1.34 | 2.10     | 126.98                | 155.46                | 112.45                |
|                       |         | 5    | 1.85   | 2.60   | 1.34 | 2.16     | 108.06                | 150.56                | 111.03                |
| <b>1<sup>Ni</sup></b> | Side-on | 2    | 1.88   | 1.88   | 1.40 | 2.13     | 68.21                 | 146.77                | 110.03                |
|                       |         | 4    | 2.05   | 2.05   | 1.33 | 2.14     | 71.04                 | 143.11                | 111.70                |
|                       | End-on  | 2    | 2.80   | 1.82   | 1.33 | 2.12     | 124.96                | 156.68                | 111.31                |
|                       |         | 4    | 2.91   | 1.89   | 1.32 | 2.13     | 130.01                | 149.06                | 115.42                |
| <b>1<sup>Cu</sup></b> | Side-on | 1    | 1.95   | 1.95   | 1.34 | 2.22     | 69.85                 | 146.17                | 107.97                |
|                       |         | 3    |        |        |      |          | TS                    |                       |                       |
|                       | End-on  | 1    | 2.88   | 1.96   | 1.31 | 2.18     | 122.54                | 152.18                | 111.69                |
|                       |         | 3    | 2.88   | 1.96   | 1.30 | 2.18     | 123.58                | 148.92                | 111.47                |

**Table S8.** Selected Geometries Calculated at the BP86/Def2-TZVPP/COSMO Level in Å (Continued)

|                       |         | 2S+1 | M-O(1)               | M-O(2) | O-O  | Avg(M-N) | A[M-O-O] <sup>a</sup> | A[N-M-O] <sup>a</sup> | A[N-M-N] <sup>b</sup> |
|-----------------------|---------|------|----------------------|--------|------|----------|-----------------------|-----------------------|-----------------------|
| <b>2<sup>Cr</sup></b> | Side-on | 2    | 1.88                 | 1.88   | 1.44 | 2.20     | 67.52                 | 136.55                | 132.12                |
|                       |         | 4    | 1.89                 | 1.89   | 1.45 | 2.21     | 67.39                 | 136.77                | 131.91                |
|                       |         | 6    | Optimizes to end-on  |        |      |          |                       |                       |                       |
|                       | End-on  | 2    | 1.73                 | 2.86   | 1.38 | 2.17     | 133.06                | 127.71                | 140.64                |
|                       |         | 4    | Optimizes to side-on |        |      |          |                       |                       |                       |
|                       |         | 6    | 2.64                 | 2.20   | 1.35 | 2.19     | 92.60                 | 121.98                | 146.54                |
| <b>2<sup>Mn</sup></b> | Side-on | 1    | 1.90                 | 1.85   | 1.44 | 2.17     | 69.17                 | 135.30                | 132.32                |
|                       |         | 3    | 1.89                 | 1.88   | 1.45 | 2.17     | 68.00                 | 136.10                | 132.50                |
|                       |         | 5    | 1.86                 | 1.86   | 1.43 | 2.30     | 67.49                 | 139.67                | 126.06                |
|                       |         | 7    | 2.19                 | 2.19   | 1.35 | 2.31     | 72.10                 | 131.06                | 133.44                |
|                       | End-on  | 1    | 1.72                 | 2.78   | 1.37 | 2.14     | 127.93                | 122.53                | 146.26                |
|                       |         | 3    | Optimizes to side-on |        |      |          |                       |                       |                       |
|                       |         | 5    | 1.84                 | 2.87   | 1.36 | 2.25     | 126.41                | 135.18                | 134.89                |
|                       |         | 7    | Optimizes to side-on |        |      |          |                       |                       |                       |
| <b>2<sup>Fe</sup></b> | Side-on | 2    | 1.89                 | 1.89   | 1.41 | 2.13     | 68.14                 | 134.39                | 134.61                |
|                       |         | 4    | 1.83                 | 1.88   | 1.41 | 2.27     | 69.55                 | 140.50                | 124.18                |
|                       |         | 6    | 1.95                 | 1.95   | 1.43 | 2.27     | 68.53                 | 135.25                | 132.47                |
|                       | End-on  | 2    | 1.77                 | 2.75   | 1.36 | 2.11     | 122.26                | 118.78                | 152.82                |
|                       |         | 4    | Optimizes to side-on |        |      |          |                       |                       |                       |
|                       |         | 6    | 1.87                 | 2.88   | 1.36 | 2.23     | 125.73                | 127.16                | 137.05                |
| <b>2<sup>Co</sup></b> | Side-on | 1    | 1.89                 | 1.89   | 1.41 | 2.11     | 68.15                 | 136.51                | 130.87                |
|                       |         | 3    | 1.80                 | 1.94   | 1.38 | 2.24     | 73.59                 | 139.34                | 125.41                |
|                       |         | 5    | 2.01                 | 2.04   | 1.36 | 2.22     | 71.82                 | 129.99                | 139.40                |
|                       | End-on  | 1    | 1.85                 | 2.85   | 1.34 | 2.12     | 125.34                | 122.53                | 146.14                |
|                       |         | 3    | 1.83                 | 2.84   | 1.34 | 2.13     | 126.06                | 124.52                | 144.24                |
|                       |         | 5    | 1.86                 | 2.87   | 1.33 | 2.20     | 127.82                | 125.06                | 136.30                |
| <b>2<sup>Ni</sup></b> | Side-on | 2    | 1.90                 | 1.89   | 1.38 | 2.20     | 68.68                 | 137.62                | 127.88                |
|                       |         | 4    | 2.11                 | 2.09   | 1.32 | 2.20     | 72.27                 | 130.49                | 135.67                |
|                       | End-on  | 2    | 1.96                 | 2.86   | 1.31 | 2.17     | 120.27                | 119.42                | 149.17                |
|                       |         | 4    | 1.93                 | 2.87   | 1.31 | 2.17     | 123.21                | 120.25                | 147.99                |
| <b>2<sup>Cu</sup></b> | Side-on | 1    | Optimizes to end-on  |        |      |          |                       |                       |                       |
|                       |         | 3    | Optimizes to end-on  |        |      |          |                       |                       |                       |
|                       | End-on  | 1    | 2.09                 | 3.00   | 1.31 | 2.19     | 122.37                | 123.78                | 142.02                |
|                       |         | 3    | 2.06                 | 2.99   | 1.29 | 2.21     | 124.35                | 123.83                | 140.78                |

<sup>a</sup> Largest bond angle (Å). <sup>b</sup> Smallest bond angle where N opposes each other.

**Table S9.** Calculated RMSD Values between Representative Structures Calculated with and without Dispersion Correction during Geometry Optimizations at the BP86(-D)/Def2-TZVPP Level in Å

| M  | 1 <sup>M</sup> | 2 <sup>M</sup> |
|----|----------------|----------------|
| Cr | 0.029          | 0.047          |
| Mn | 0.086          | 0.068          |
| Fe | 0.069          | 0.051          |
| Co | 0.131          | 0.056          |
| Ni | 0.036          | 0.038          |
| Cu | 0.060          | 0.066          |

## Coordinates

Coordinates are given in xyz-file format. Multiplicity is indicated within parenthesis in the comment line.

## Gas Phase 12-TMC ligand (1)

45

$\text{I}^{\text{Cr}}$  No  $\text{O}_2$  (2)  
Cr -2.36669 -13.51641 0.11245  
C -4.40792 -15.55500 1.14197  
H -6.64514 -16.52629 1.61055  
H -8.47646 -15.50724 0.15183  
H -4.82366 -14.74582 1.75239  
N -1.32240 -11.84475 -0.71277  
N -2.93441 -15.36169 1.00453  
N -1.38107 -13.08418 1.91000  
C -0.43970 -11.34299 0.39588  
H -0.96748 -10.50202 0.86579  
H 0.50515 -10.93527 -0.00333  
C -2.13830 -12.23972 2.87605  
H -3.07003 -12.74055 3.16059  
H -2.40413 -11.28464 2.40919  
H -1.54105 -12.04360 3.78303  
C -1.09526 -14.43363 2.48191  
H -0.79491 -14.35975 3.54523  
H -0.24398 -14.85272 1.93150  
C -2.31778 -15.34766 2.37425  
H -2.04529 -16.36666 2.70021  
H -3.09409 -14.99586 3.06651  
C -0.13305 -12.39763 1.46129  
H 0.54376 -13.16653 1.06986  
H 0.38042 -11.90798 2.31146  
C -2.18058 -10.71874 -1.18607  
H -2.87092 -11.08355 -1.95456  
H -2.77696 -10.34025 -0.34878  
N -1.52314 -14.65379 -1.43083  
C -0.56579 -12.39819 -1.88659  
H -1.18353 -12.21465 -2.77525  
H 0.38092 -11.85224 -2.04254  
C -2.36587 -14.87049 -2.64065  
H -3.28657 -15.39819 -2.36952  
H -2.65350 -13.90691 -3.07629  
H -1.82159 -15.46029 -3.39813  
C -1.20985 -15.94891 -0.75644  
H -0.95823 -16.73286 -1.49685  
H -0.32309 -11.85224 -0.13297  
C -2.38523 -16.42751 0.09876  
H -2.08092 -17.32123 0.67101  
H -3.20822 -16.74192 -0.55567  
C -0.28184 -13.89722 -1.77873  
H 0.46482 -14.10009 -1.00173  
H 0.14216 -14.25050 -2.73853  
H -1.57209 -9.89633 -1.60231

45

$\text{I}^{\text{Cr}}$  No  $\text{O}_2$  (4)  
Cr -2.24215 -13.55845 0.12604  
C -4.37916 -15.48416 1.13313  
H -6.65522 -16.44288 1.60614  
H -4.83808 -15.41941 0.14079  
H -4.76185 -14.65380 1.73600  
N -1.28723 -11.87332 -0.70807  
N -1.89500 -15.36094 1.00508  
N -1.40547 -13.02860 1.99129  
C -0.43515 -11.33125 0.40853  
H -0.97125 -10.46739 0.82317  
H 0.52309 -10.94875 0.01851  
C -2.15499 -12.20556 2.97755  
H -3.09570 -12.70291 3.23908  
H -2.40551 -11.23438 2.53626  
H -1.56032 -12.04641 3.89369  
C -1.09811 -14.39246 2.53063  
H -0.82331 -14.33348 3.60202  
H -0.22864 -14.77065 1.98057  
C -2.28111 -15.35597 2.37939  
H -1.96028 -16.37095 2.66744  
H -3.07605 -15.06850 3.08011  
C -0.15807 -12.33657 1.53219  
H 0.54064 -13.10869 1.19018  
H 0.31913 -11.80021 2.37558  
C -2.21498 -10.79801 -1.17567  
H -2.88530 -11.19897 -1.94345  
H -2.83105 -10.45907 -0.33598  
N -1.59171 -14.68454 -1.51994  
C -0.52559 -12.41499 -1.88813  
H -1.10993 -12.16466 -2.78294  
H 0.44607 -11.90418 -1.99329  
C -2.38113 -14.98825 -2.73450  
H -3.32005 -15.39356 -2.46286  
H -2.63551 -13.93266 -3.18596

H -1.84587 -15.51669 -3.47581  
C -1.24226 -15.97891 -0.82985  
H -1.03837 -16.77507 -1.57229  
H -0.33121 -15.82777 -0.23962  
C -2.38724 -16.43487 0.08156  
H -2.06474 -17.32259 0.65127  
H -3.23973 -16.75111 -0.53338  
C -0.29503 -13.93020 -1.84229  
H 0.44861 -14.17733 -1.07610  
H 0.11048 -14.25580 -2.82007  
H -1.64942 -9.94430 -1.58828

45

$\text{I}^{\text{Cr}}$  No  $\text{O}_2$  (6)  
Cr -2.67153 -13.38800 0.06626  
C -4.49626 -15.64760 1.21669  
H -4.62717 -16.64224 1.67881  
H -5.01984 -15.62809 0.25484  
H -4.94231 -14.88807 1.86785  
N -1.41771 -11.78565 -0.74183  
N -3.05424 -15.33125 0.99996  
N -1.32738 -13.07364 1.96377  
C -0.54651 -11.31217 0.38634  
H -1.11001 -10.53041 0.91229  
H 0.36373 -10.83139 -0.01483  
C -1.96428 -12.27020 3.02420  
H -2.89867 -12.74276 3.34779  
H -2.22460 -11.27651 2.64195  
H -1.29695 -12.15531 3.89856  
C -1.08826 -14.46345 2.40328  
H -0.70836 -14.50816 3.44202  
H -0.30383 -14.89183 1.76833  
C -2.36751 -15.30831 2.33557  
H -2.13842 -16.33859 2.66146  
H -3.09347 -14.90743 3.05451  
C -0.14444 -12.39123 1.40017  
H 0.49768 -13.14613 0.93208  
H 0.46619 -11.90777 2.18660  
C -2.17154 -10.61439 -1.27559  
H -2.84889 -10.94878 -2.06893  
H -2.77137 -10.17293 -0.47235  
N -1.46368 -14.69976 -1.46638  
C -0.62314 -12.38842 -1.86566  
H -1.23078 -12.27432 -2.77276  
H 0.30094 -11.80557 -0.20970  
C -2.18198 -14.97213 -2.72192  
H -3.12789 -15.49786 -2.51172  
H -2.45477 -14.03255 -3.21958  
H -1.58245 -15.58611 -3.41289  
C -1.22657 -15.94044 -0.70029  
H -0.93633 -16.78119 -1.35929  
H -0.37848 -15.77413 -0.02441  
C -2.47950 -16.36826 0.07758  
H -2.26150 -17.29480 0.63844  
H -3.27008 -16.61445 -0.64265  
C -0.26257 -13.87285 -1.70248  
H 0.42870 -14.02088 -0.86330  
H 0.28275 -14.18787 -2.61288  
H -1.49081 -9.84532 -1.68216

47

$\text{I}^{\text{Cr}}$  Side-on (2)  
Cr -2.54300 -13.43900 0.08423  
C -4.45298 -15.56894 1.19509  
H -4.64554 -16.55004 1.65815  
H -4.95025 -15.50866 0.22193  
H -4.85758 -14.76970 1.82396  
N -1.36761 -11.82339 -0.73048  
N -2.99033 -15.34093 1.00350  
N -1.34414 -13.12292 1.84503  
C -0.50600 -11.31246 0.38807  
H -1.08064 -10.52952 0.89845  
H 0.40338 -10.83107 -0.01000  
C -2.09282 -12.30869 2.84223  
H -3.03080 -12.80558 3.10589  
H -2.35499 -11.33762 2.41216  
H -1.48463 -12.15948 3.74983  
C -1.05487 -14.47673 2.39066  
H -0.68837 -14.42403 3.43186  
H -0.24774 -14.91316 1.78995  
C -2.31247 -15.34563 2.34432  
H -2.06574 -16.37563 2.65200  
H -3.04304 -14.96820 3.06995  
C -0.12488 -12.39624 1.39610  
H 0.56188 -13.12742 0.95310  
H 0.40511 -11.93265 2.24733  
C -2.19951 -10.69979 -1.25254  
H -2.87459 -11.08515 -2.03255  
H -2.81627 -10.30862 -0.43747

N -1.47403 -14.63955 -1.34927  
C -0.56035 -12.39980 -1.85930  
H -1.15784 -12.27191 -2.76998  
H 0.36920 -11.82461 -2.00646  
C -2.30021 -14.83743 -2.57304  
H -3.24847 -15.31732 -2.31435  
H -2.54669 -13.87091 -3.02169  
H -1.75847 -15.45852 -3.30577  
C -1.21035 -15.94815 -0.68946  
H -0.94057 -16.72402 -1.42795  
H -0.34547 -15.82590 -0.02506  
C -2.45008 -16.39812 0.08420  
H -2.23300 -17.32543 0.64095  
H -3.25069 -16.63509 -0.62697  
C -0.32479 -13.88521 -1.67905  
H 0.48545 -14.04271 -0.86602  
H 0.23614 -14.26533 -2.60283  
H -1.56826 -9.89789 -1.66778  
O -4.15254 -13.13035 -0.78985  
O -4.09585 -12.51302 0.50615

47

$\text{I}^{\text{Cr}}$  Side-on (4)  
Cr -2.54400 -13.43884 0.08407  
C -4.45520 -15.56104 1.19332  
H -4.65258 -16.54076 1.65700  
H -4.94920 -15.49626 0.21884  
H -4.85533 -14.75700 1.81879  
N -1.36757 -11.82317 -0.73120  
N -2.99062 -15.34115 1.00402  
N -1.33935 -13.12152 1.85219  
C -0.50839 -11.31168 0.38876  
H -1.08560 -10.53063 0.89897  
H 0.39925 -10.82753 -0.00943  
C -2.08920 -12.30805 2.84871  
H -3.02728 -12.80536 3.11132  
C -2.35350 -11.33789 2.41783  
H -1.48126 -12.15806 3.75633  
C -1.05288 -14.47754 2.39230  
H -0.68570 -14.42925 3.43334  
H -0.24668 -14.91354 1.78987  
C -2.31212 -15.34503 2.34438  
H -2.06681 -16.37526 2.65149  
H -3.04268 -14.96717 0.60968  
C -0.12328 -12.39436 1.39730  
H 0.56296 -13.12530 0.95295  
H 0.40928 -11.92895 2.24575  
C -2.20681 -10.70389 -1.25197  
H -2.88033 -11.09441 -2.02135  
H -2.82712 -10.32071 -0.43588  
N -1.46976 -14.64453 -1.35522  
C -0.56037 -12.40052 -1.85941  
H -1.15800 -12.27285 -2.76995  
H 0.36833 -13.82418 -2.00620  
C -2.29657 -14.84076 -2.57849  
H -3.24567 -15.31882 -2.31942  
H -2.54351 -13.87362 -3.02559  
H -1.75546 -15.46176 -3.31172  
C -1.21021 -15.95088 -0.69068  
H -0.94085 -16.72955 -1.42620  
H -0.34592 -15.82856 -0.02541  
C -2.45202 -16.39732 0.08285  
H -2.23789 -17.32542 0.63910  
H -3.25326 -16.63142 -0.62849  
C -0.23240 -13.88475 -1.68007  
H 0.48619 -14.04304 -0.86537  
H 0.24207 -14.26353 -2.60301  
H -1.57959 -9.89827 -1.66577  
O -4.14828 -13.13725 -0.79746  
O -4.09012 -12.50959 0.51571

47

$\text{I}^{\text{Cr}}$  Side-on (6)  
Cr -2.81465 -13.33704 0.03878  
C -4.42967 -15.92092 1.43621  
H -4.49516 -16.92060 1.90225  
H -5.03093 -15.92124 0.51933  
H -4.86216 -15.18416 2.12375  
N -1.23534 -11.65241 -0.82775  
N -3.03543 -15.54110 1.11568  
N -1.43481 -13.11251 1.77068  
C -0.47589 -11.23818 0.37256  
H -1.06209 -10.45006 0.86548  
H 0.49542 -10.78035 0.10151  
C -2.18579 -12.34037 2.79674  
H -3.12397 -12.84891 3.04384  
H -2.43796 -11.34832 2.40715  
H -1.58480 -12.22425 3.71527  
C -1.06657 -14.45618 2.30135

H -0.63915 -14.36491 3.31697  
H -0.26554 -14.84649 1.66401  
C -2.24013 -15.44213 2.36137  
H -1.84246 -16.42882 2.66744  
H -2.92825 -15.13074 3.15824  
C -0.20529 -12.36549 1.37208  
H 0.49989 -13.08822 0.94721  
H 0.28822 -11.93654 2.26266  
C -1.89176 -10.47367 -1.43576  
H -2.52476 -10.79591 -2.27116  
H -2.53646 -9.98954 -0.69235  
N -1.56683 -14.58197 -1.30919  
C -0.44076 -12.37516 -1.84755  
H -0.94295 -12.22281 -2.81186  
H 0.57089 -11.93935 -1.95892  
C -2.35416 -14.75234 -2.56066  
H -3.29966 -15.26126 -2.34362  
H -2.59643 -13.77541 -2.99302  
H -1.78855 -15.34400 -3.30114  
C -1.29777 -15.91597 -0.69186  
H -1.02439 -16.64958 -1.47110  
H -0.41827 -15.81409 -0.04493  
C -2.48518 -16.46887 0.10289  
H -2.17600 -17.43002 0.55827  
H -3.30363 -16.70495 -0.59069  
C -0.28220 -13.88136 -1.59856  
H 0.38459 -14.06481 -0.74804  
H 0.20912 -14.32904 -2.48178  
H -1.16349 -9.73132 -1.80905  
O -4.60630 -12.93466 -0.80822  
O -4.54784 -12.35507 0.38203

47

$\text{I}^{\text{Cr}}$  End-on (2)  
Cr -2.55796 -13.46792 0.07636  
C -4.39945 -15.57686 1.27192  
H -4.59017 -16.55494 1.74385  
H -4.95358 -15.51552 0.32920  
H -4.75562 -14.77642 1.92826  
N -1.35329 -11.89524 -0.79095  
N -2.94441 -15.38337 0.99968  
N -1.39901 -13.14015 1.79344  
C -0.62876 -11.28299 0.36981  
H -1.32611 -10.57546 0.83636  
H 0.24672 -10.70381 0.02866  
C -2.21938 -12.38446 2.78398  
H -3.00230 -13.03410 3.18653  
H -2.73038 -11.54321 2.29458  
H -1.58637 -12.02730 3.61214  
C -1.00303 -14.47433 2.33202  
H -0.61480 -14.39320 3.36260  
H -0.18022 -14.85097 1.71048  
C -2.19376 -15.43049 2.30633  
H -1.85930 -16.45613 2.53236  
H -2.90285 -15.15029 3.09403  
C -0.20861 -12.33125 1.38858  
H 0.54083 -13.01448 0.96697  
H 0.25348 -11.84347 2.26376  
C -2.17889 -10.82914 -1.43426  
H -2.70853 -11.25611 -2.29329  
H -2.92629 -10.46819 -0.71561  
N -1.47420 -14.67709 -1.36023  
C -0.42362 -12.47870 -1.81753  
H -0.87520 -12.30073 -2.80091  
H 0.54188 -11.94701 -1.81885  
C -2.27043 -14.81001 -2.60994  
H -3.23299 -15.28538 -2.39310  
H -2.47483 -13.82074 -3.03227  
H -1.73030 -15.41594 -3.35734  
C -1.25377 -16.01620 -0.73619  
H -1.00505 -16.77634 -1.49707  
H -0.38669 -15.93796 -0.06737  
C -2.49408 -16.44049 0.03928  
H -2.30958 -17.39689 0.55895  
H -3.32345 -16.61243 -0.65905  
C -0.18681 -13.97512 -1.62584  
H 0.47131 -14.16227 -0.76774  
H 0.31997 -14.38802 -2.51668  
H -1.54473 -9.99563 -1.77749  
O -4.39412 -11.34692 0.70024  
O -3.96653 -12.52744 0.26789

47

$\text{I}^{\text{Cr}}$  End-on (4)  
Cr -2.64988 -13.40906 0.04484  
C -4.45614 -15.66823 1.27836  
H -4.59334 -16.63394 1.79214  
H -5.01906 -15.67981 0.33853  
H -4.85316 -14.85815 1.89920

N -1.36769 -11.84762 -0.84193  
N -3.01827 -15.40502 0.98884  
N -1.36623 -13.12345 1.83573  
C -0.65576 -11.27388 0.34693  
H -1.36323 -10.58570 0.82761  
H 0.21202 -10.67692 0.01671  
C -2.13702 -12.36292 2.85442  
H -2.90616 -13.00493 3.29428  
H -2.66450 -11.52073 2.38227  
H -1.46854 -10.20302 3.65388  
C -1.02376 -14.48312 2.31096  
H -0.62809 -14.46873 3.34302  
H -0.21993 -14.86884 1.67210  
C -2.25216 -15.40427 2.28230  
H -1.94140 -16.43106 2.54009  
H -2.95358 -15.08535 3.06257  
C -2.0530 -12.32760 1.36094  
H 0.53127 -13.01304 0.92233  
H 0.29550 -11.81798 2.20303  
C -2.15183 -10.75672 -1.48995  
H -2.63022 -11.14552 -2.39625  
H -2.93556 -10.43780 -0.78729  
N -1.44965 -14.68308 -1.36434  
C -0.43083 -12.46482 -1.83657  
H -0.87309 -12.31574 -2.82893  
H 0.53366 -11.93022 -1.84409  
C -2.21927 -14.83857 -2.62547  
H -3.18156 -15.32190 -2.42492  
H -2.42949 -13.85865 -3.06707  
H -1.65757 -14.44757 -3.35540  
C -1.25044 -16.00502 -0.71408  
H -0.98581 -16.78046 -1.45473  
H -0.40002 -15.92788 -0.02564  
C -2.51370 -16.43639 0.03218  
H -2.32663 -17.39198 0.55325  
H -3.31908 -16.62463 -0.69023  
C -0.17808 -13.96075 -1.61178  
H 0.47061 -14.12632 -0.74315  
H 0.35520 -14.36864 -2.48987  
H -1.50485 -9.90715 -1.76239  
O -4.20613 -11.33513 0.74350  
O -4.20658 -12.65688 0.48129

47

$\text{I}^{\text{Cr}}$  End-on (6)  
Cr -2.69009 -15.68410 -0.03126  
C -4.47145 -15.68613 1.20549  
H -4.59514 -16.63895 1.74564  
H -5.01201 -15.74132 0.25401  
H -4.89750 -14.86748 1.79517  
N -1.41171 -11.85571 -0.86588  
N -3.02993 -15.40216 0.94031  
N -1.37815 -13.07368 1.91070  
H -0.70818 -11.27941 0.32845  
H -1.42659 -10.59997 0.80420  
H 0.14997 -10.66872 -0.00452  
C -2.04031 -12.33201 3.00459  
H -2.94568 -12.85709 3.32634  
H -2.36082 -11.34651 2.65181  
H -1.36092 -12.21333 3.86762  
C -1.06130 -14.5737 2.31456  
H -0.66130 -14.50606 3.34587  
H -0.26586 -14.83524 1.66018  
C -2.30276 -15.35880 2.26069  
H -2.02591 -16.38295 2.56345  
H -3.02782 -14.99795 3.00046  
C -0.23772 -12.30662 1.36325  
H 0.48276 -13.00885 0.92461  
H 0.30586 -11.76535 2.15972  
C -2.14448 -10.74538 -1.54169  
H -2.67977 -11.13987 -2.41314  
H -2.87647 -10.33221 -0.84082  
N -1.45748 -14.69657 -1.38990  
C -0.46287 -12.46715 -1.85312  
H -0.90595 -12.33524 -2.84802  
H 0.49334 -11.91693 -1.86488  
C -2.18559 -14.89124 -2.67250  
H -3.13267 -15.41165 -2.49428  
H -2.42087 -13.92354 -3.12804  
H -1.57751 -14.88262 -

H -1.44972 -9.95655 -1.87590  
O -4.13740 -11.37152 0.77473  
O -4.26850 -12.69107 0.85719

45

**I<sup>Mn</sup> No O<sub>2</sub> (1)**  
Mn -2.12925 -13.57939 0.15995  
C -4.25673 -15.42424 1.12930  
H -4.57273 -16.36898 1.60502  
H -4.69983 -15.35796 0.12955  
H -4.62513 -14.58066 1.72329  
N -1.20090 -11.92740 -0.65886  
N -2.77062 -15.34099 1.02237  
N -1.29596 -13.07175 1.96588  
C -0.34170 -11.35293 0.43686  
H -0.89050 -10.50200 0.86181  
H 0.60355 -10.94906 0.03643  
C -2.07958 -12.24184 2.91879  
H -3.01983 -12.74517 3.16872  
H -3.23896 -11.28050 2.45677  
H -1.51079 -12.05827 3.84751  
C -0.98595 -14.41531 2.54920  
H -0.70565 -14.33473 3.61724  
H -0.11742 -14.81179 2.00889  
C -2.18010 -15.36010 2.40781  
H -1.88328 -16.38047 2.70294  
H -2.97475 -15.05305 3.10054  
C -0.04494 -12.36488 1.54390  
H 0.66115 -13.12690 1.19173  
H 0.42822 -11.84437 2.39866  
C -2.16270 -10.80773 -1.11405  
H -2.83024 -11.30033 -1.87464  
H -2.77511 -10.55550 -0.26589  
C -1.43230 -14.68081 -1.42614  
C -0.43200 -12.43651 -1.84951  
H -1.02987 -12.20493 -2.74025  
H 0.52634 -11.90309 -1.96539  
C -2.29184 -14.87419 -2.62436  
C -3.23106 -15.36089 -2.34001  
H -2.54159 -13.90385 -3.06711  
H -1.78089 -15.49424 -3.38227  
H -1.12324 -15.99227 -0.77255  
H -0.91192 -16.77509 -1.52618  
H -0.21410 -15.85553 -0.17449  
C -2.27960 -16.44248 0.12107  
H -1.97653 -17.33129 0.69981  
H -2.54159 -16.75055 -0.50160  
C -0.17861 -13.94348 -1.78457  
H 0.57300 -14.17220 -0.10192  
H 0.22459 -14.28927 -2.75580  
H -1.63478 -10.00797 -1.53630

45

**I<sup>Mn</sup> No O<sub>2</sub> (3)**  
Mn -2.10539 -13.58842 0.16340  
C -4.23960 -15.40593 1.11882  
H -4.56907 -16.34641 1.59354  
H -4.67592 -15.33510 0.11639  
H -4.60188 -14.55753 1.70974  
H -1.18655 -11.93871 -0.65409  
N -2.75146 -15.34244 1.02198  
N -1.30301 -13.06442 1.97502  
C -0.32955 -11.35561 0.44025  
H -0.87324 -10.49406 0.84985  
H 0.62187 -10.96597 0.04099  
C -2.09948 -12.23429 2.91672  
C -3.03743 -12.74376 3.16366  
H -2.35317 -11.27770 2.44685  
H -1.53925 -12.04010 3.84797  
C -0.98883 -14.40505 2.56667  
H -0.72307 -14.31747 3.63804  
H -0.11115 -14.79543 2.03700  
C -2.17009 -15.36396 2.41236  
H -1.86137 -16.38210 2.70212  
H -2.97352 -15.07296 3.10205  
C -0.04800 -12.35650 1.56143  
H 0.66246 -13.12047 1.22321  
H 0.41242 -11.82788 2.41840  
C -2.16519 -10.90442 -1.10283  
H -2.83369 -11.33269 -1.85771  
H -2.77535 -10.58429 -0.25115  
N -1.43984 -14.68260 -1.43727  
C -0.42116 -12.44084 -1.85137  
H -1.01399 -12.19013 -2.74049  
H 0.54326 -11.91706 -1.95830  
C -2.31269 -14.86659 -2.62689  
C -3.25102 -15.35063 -2.33440  
H -2.56237 -13.89280 -3.06246  
H -1.81338 -15.48509 -3.39316  
C -1.12607 -15.99805 -0.79073  
H -0.92782 -16.77879 -1.55039  
H -0.20906 -15.86405 -0.20433

C -2.26840 -16.44865 0.12054  
H -1.95285 -17.33210 0.70039  
H -3.12545 -16.76533 -0.48799  
C -0.18327 -13.95097 -1.80295  
H 0.57200 -14.19084 -1.04490  
H 0.20703 -14.29307 -2.78094  
H -1.64993 -10.02670 -1.53017

45

**I<sup>Mn</sup> No O<sub>2</sub> (5)**  
Mn -2.40685 -13.46873 0.11948  
C -4.37661 -15.63600 1.20478  
H -4.55885 -16.62277 1.66613  
H -4.86662 -15.60245 0.22553  
H -4.82155 -14.85755 1.83404  
N -1.27598 -11.80610 -0.70852  
N -2.91811 -15.37177 1.04091  
N -1.26212 -13.06465 2.01441  
C -0.40277 -11.33786 0.41521  
H -0.94296 -10.52147 0.91370  
H 0.53242 -10.90200 0.02110  
C -1.91461 -12.23811 3.05185  
H -2.85510 -12.70408 3.36884  
H -2.16228 -11.25046 2.64518  
H -1.26512 -12.10740 3.93581  
C -1.01565 -14.44894 2.48379  
H -0.66842 -14.46215 3.53487  
H -0.20548 -14.87248 1.87789  
C -2.27278 -15.32685 2.39159  
H -2.02308 -16.34676 2.73402  
H -3.02883 -14.93953 3.08765  
C -0.05415 -12.40781 1.46126  
H 0.57984 -13.18545 1.01941  
H 0.54251 -11.92252 2.25766  
C -2.08850 -10.65845 -1.20497  
H -2.78075 -11.00639 -1.97955  
H -2.68029 -10.24650 -0.38033  
N -1.39754 -14.71128 -1.46262  
C -0.51581 -12.39783 -1.85533  
H -1.13631 -12.25158 -2.74944  
H 0.42122 -11.83850 -0.20662  
C -2.14809 -14.99461 -2.70476  
H -3.08499 -15.51405 -2.47132  
H -2.41459 -14.05724 -3.20701  
H -1.55995 -15.61806 -3.40178  
C -1.11890 -15.94604 -0.69194  
H -0.82409 -16.77982 -1.35815  
H -0.26396 -15.74752 -0.03462  
C -2.33313 -16.40733 0.12959  
H -2.05564 -17.31106 0.70056  
H -3.13371 -16.70576 -0.55933  
C -0.18848 -13.89383 -1.72460  
H 0.52493 -14.06499 -0.90884  
H 0.31618 -14.21130 -2.65732  
H -1.44799 -9.86194 -1.62332

45

**I<sup>Mn</sup> No O<sub>2</sub> (7)**  
Mn -2.80350 -13.32252 0.05655  
C -4.35003 -15.78012 1.43401  
C -4.45094 -16.78024 1.88880  
H -4.94609 -15.73553 0.51469  
H -4.74594 -15.02641 2.12498  
N -1.19994 -11.72961 -0.77844  
N -2.93271 -15.47059 1.11966  
N -1.31854 -13.09998 1.85716  
C -0.45214 -11.24668 0.40927  
H -1.08231 -10.48859 0.89435  
H 0.48261 -10.73631 0.11164  
C -2.05020 -12.34790 2.90539  
H -2.99185 -12.85258 3.15017  
H -2.30467 -11.34697 2.53921  
H -1.43902 -12.25390 3.82081  
C -0.95072 -14.45556 2.33949  
H -0.51214 -14.40783 3.35408  
H -0.16181 -14.83661 1.68074  
C -2.13843 -15.42160 2.37546  
H -1.76777 -16.42574 2.65108  
H -2.82312 -15.11655 3.17713  
C -0.11553 -12.34247 1.41926  
H 0.59383 -13.05601 0.98404  
H 0.39565 -11.88317 2.28478  
C -1.92414 -10.59363 -1.40044  
H -2.54755 -10.96258 -2.22359  
H -2.58949 -10.13566 -0.65898  
N -1.45235 -14.63255 -1.32496  
C -0.36166 -12.41330 -1.79812  
H -0.84832 -12.25883 -2.76961  
H 0.63516 -11.94204 -1.87582  
C -2.20480 -14.80467 -2.59219  
H -3.15852 -15.30876 -2.39862  
H -2.43955 -13.82814 -3.03105

H -1.62158 -15.39792 -3.31899  
C -1.21682 -15.95223 -0.67716  
H -0.95719 -16.71657 -1.43177  
C -0.34259 -15.85908 -0.02086  
C -2.43087 -16.43996 0.11378  
H -2.18385 -17.40976 0.58474  
H -3.25910 -16.63259 -0.58172  
C -0.17301 -13.91590 -1.56461  
H -0.47025 -14.09352 -0.69463  
H 0.35745 -14.30474 -2.43708  
H -1.23124 -9.82609 -1.78773

47

**I<sup>Mn</sup> Side-on (1)**  
Mn -2.45626 -13.44795 0.11793  
C -4.33302 -15.47739 1.37846  
H -4.53160 -16.46772 1.81841  
H -4.90490 -15.34804 0.45485  
H -4.64609 -14.69304 2.07527  
N -1.28055 -11.87565 -0.73397  
N -2.88070 -15.31300 1.07476  
N -1.26600 -13.13455 1.84554  
C -0.53872 -11.27113 0.41582  
H -1.22464 -10.56494 0.89927  
H 0.32650 -10.68738 0.05771  
C -2.05190 -12.39129 2.87073  
H -2.96979 -12.93462 3.11180  
H -2.35108 -11.41602 2.47653  
H -1.45304 -12.25340 3.78645  
C -0.87912 -14.47306 2.36311  
H -0.46963 -14.41246 3.38814  
H -0.07833 -14.85812 1.71988  
C -2.09556 -15.39654 2.35775  
H -1.78603 -16.43529 2.55619  
H -2.77312 -15.11078 3.17083  
C -0.09082 -12.32145 1.42389  
H 0.65570 -12.99696 0.98700  
H 0.38513 -11.82931 2.28981  
C -2.12210 -10.81976 -1.37035  
H -2.68645 -11.26204 -2.19771  
H -2.84327 -10.44795 -0.63642  
N -1.40192 -14.63388 -1.28835  
C -0.35475 -12.45688 -1.77024  
H -0.81774 -12.28825 -2.74968  
H 0.60449 -11.91495 -1.77960  
C -2.20442 -14.75294 -2.53866  
H -3.16411 -15.22932 -2.32046  
H -2.42543 -13.76066 -2.94168  
H -1.65806 -15.34543 -3.29147  
C -1.21734 -15.97969 -0.67586  
H -0.99868 -16.74143 -1.44422  
H -0.90930 -12.21968 -2.76526  
C -2.47521 -16.36555 0.09162  
H -2.33204 -17.33605 0.59710  
H -3.31290 -16.48766 -0.60662  
C -0.11136 -13.95111 -1.56748  
H 0.55260 -14.13435 -1.13322  
H 0.38634 -14.36806 -2.46181  
H -1.49581 -9.99533 -1.74707  
O -3.92501 -12.38296 0.44370  
O -4.12619 -13.28801 -0.64685

47

**I<sup>Mn</sup> Side-on (3)**  
Mn -2.43714 -13.45530 0.12089  
C -4.32857 -15.45710 1.37795  
H -4.53427 -16.44668 1.81598  
H -4.89911 -15.31589 0.45537  
H -4.63134 -14.67037 2.07639  
N -1.28175 -11.88418 -0.73028  
N -2.87502 -15.30667 1.07120  
N -1.26162 -13.13366 1.84609  
C -0.54461 -11.26794 0.41694  
H -1.23779 -10.56692 0.89731  
H -3.15555 -10.67740 0.05775  
C -2.05972 -12.39585 2.86566  
H -2.97929 -12.94091 3.09539  
H -2.57510 -11.42007 2.47177  
H -1.46831 -12.26104 3.78643  
C -0.87151 -14.47308 2.36238  
H -0.66195 -14.41216 3.88698  
H -0.06915 -14.85618 1.71911  
C -2.08746 -15.39761 2.35399  
H -1.77750 -16.43708 2.54677  
H -2.76412 -15.11585 3.16899  
C -0.08933 -12.31195 1.42821  
H 0.66414 -12.98255 0.99484  
H 0.37942 -11.81642 2.29565  
C -2.13275 -10.83840 -1.37160  
H -2.68634 -11.28821 -2.20202  
H -2.86454 -10.48123 -0.64103  
N -1.39899 -14.63731 -1.28785

C -0.34825 -12.46130 -1.76418  
H -0.80524 -12.28893 -2.74560  
H 0.61094 -11.91958 -1.76536  
C -2.20937 -14.74242 -2.53471  
H -3.16660 -15.22342 -2.31655  
H -2.43590 -13.74607 -2.92392  
H -1.66411 -15.32492 -3.29580  
C -1.22182 -15.98805 -0.68136  
H -1.00990 -16.74722 -1.45364  
H -0.34841 -15.95500 -0.01687  
C -2.48073 -16.36497 0.08859  
H -2.34428 -17.33652 0.59383  
H -3.32140 -16.47930 -0.60718  
C -0.10658 -13.95646 -1.56483  
H 0.55651 -14.14268 -0.71003  
H 0.39094 -14.37410 -2.45852  
H -1.51317 -10.00677 -1.74317  
O -3.90178 -12.38146 0.44900  
O -4.10923 -13.30312 -0.64704

47

**I<sup>Mn</sup> Side-on (5)**  
Mn -2.60727 -13.34660 0.10129  
C -4.37280 -15.65658 1.37983  
H -4.55445 -16.64607 1.83288  
H -4.92161 -15.58173 0.43471  
H -4.75519 -14.87575 2.04629  
N -1.17192 -11.71513 -0.75492  
N -2.92849 -15.42216 1.12477  
N -1.30685 -13.08277 1.84651  
C -0.37660 -11.25002 0.40816  
H -0.95906 -10.45855 0.89850  
H 0.57599 -10.78944 0.08833  
C -2.04908 -12.28815 2.86408  
H -2.99621 -12.77850 3.10978  
H -2.28897 -11.29902 2.46151  
H -1.44373 -12.17479 3.77884  
C -0.96938 -14.43406 2.37931  
H -0.55473 -14.33571 3.40025  
H -0.17154 -14.84270 1.74813  
C -2.17590 -15.37857 2.40438  
H -1.83021 -16.38480 2.70258  
H -2.87719 -15.04934 3.18148  
C -0.07437 -12.35562 1.42143  
H 0.61614 -13.09124 0.99249  
H 0.43636 -11.91656 2.29621  
C -1.95152 -10.58600 -1.32253  
H -2.61022 -10.96050 -2.11372  
H -2.58680 -10.15742 -0.53969  
N -1.46889 -14.58943 -1.29535  
C -0.37864 -12.38262 -1.81873  
H -0.90930 -12.21968 -2.76526  
H 0.61534 -11.91420 -1.93610  
C -2.27894 -14.75822 -2.53431  
H -3.23357 -15.23804 -2.29634  
H -2.50833 -13.78144 -2.97150  
H -1.73282 -15.37157 -3.27027  
C -1.21442 -15.91711 -0.65934  
H -0.95653 -16.66827 -1.42594  
H -0.33395 -15.81581 -0.01231  
C -2.41941 -16.41270 0.14442  
H -2.15296 -17.36701 0.63495  
H -3.24544 -16.63365 -0.54401  
C -1.46889 -14.58943 -1.29535  
H -0.37864 -12.38262 -1.81873  
H -0.90930 -12.21968 -2.76526  
H 0.61534 -11.91420 -1.93610  
C -2.27894 -14.75822 -2.53431  
H -3.23357 -15.23804 -2.29634  
H -2.50833 -13.78144 -2.97150  
H -1.73282 -15.37157 -3.27027  
C -1.21442 -15.91711 -0.65934  
H -0.95653 -16.66827 -1.42594  
H -0.33395 -15.81581 -0.01231  
C -2.41941 -16.41270 0.14442  
H -2.15296 -17.36701 0.63495  
H -3.24544 -16.63365 -0.54401  
C -1.46889 -14.58943 -1.29535  
H -0.37864 -12.38262 -1.81873  
H -0.90930 -12.21968 -2.76526  
H 0.61534 -11.91420 -1.93610  
C -2.27894 -14.75822 -2.53431  
H -3.23357 -15.23804 -2.29634  
H -2.50833 -13.78144 -2.97150  
H -1.73282 -15.37157 -3.27027  
C -1.21442 -15.91711 -0.65934  
H -0.95653 -16.66827 -1.42594  
H -0.33395 -15.81581 -0.01231  
C -2.41941 -16.41270 0.14442  
H -2.15296 -17.36701 0.63495  
H -3.24544 -16.63365 -0.54401  
C -1.46889 -14.58943 -1.29535  
H -0.37864 -12.38262 -1.81873  
H -0.90930 -12.21968 -2.76526  
H 0.61534 -11.91420 -1.93610  
C -2.27894 -14.75822 -2.53431  
H -3.23357 -15.23804 -2.29634  
H -2.50833 -13.78144 -2.97150  
H -1.73282 -15.37157 -3.27027  
C -1.21442 -15.91711 -0.65934  
H -0.95653 -16.66827 -1.42594  
H -0.33395 -15.81581 -0.01231  
C -2.41941 -16.41270 0.14442  
H -2.15296 -17.36701 0.63495  
H -3.24544 -16.63365 -0.54401  
C -1.46889 -14.58943 -1.29535  
H -0.37864 -12.38262 -1.81873  
H -0.90930 -12.21968 -2.76526  
H 0.61534 -11.91420 -1.93610  
C -2.27894 -14.75822 -2.53431  
H -3.23357 -15.23804 -2.29634  
H -2.50833 -13.78144 -2.97150  
H -1.73282 -15.37157 -3.27027  
C -1.21442 -15.91711 -0.65934  
H -0.95653 -16.66827 -1.42594  
H -0.33395 -15.81581 -0.01231  
C -2.41941 -16.41270 0.14442  
H -2.15296 -17.36701 0.63495  
H -3.24544 -16.63365 -0.54401  
C -1.46889 -14.58943 -1.29535  
H -0.37864 -12.38262 -1.81873  
H -0.90930 -12.21968 -2.76526  
H 0.61534 -11.91420 -1.93610  
C -2.27894 -14.75822 -2.53431  
H -3.23357 -15.23804 -2.29634  
H -2.50833 -13.78144 -2.97150  
H -1.73282 -15.37157 -3.27027  
C -1.21442 -15.91711 -0.65934  
H -0.95653 -16.66827 -1.42594  
H -0.33395 -15.81581 -0.01231  
C -2.41941 -16.41270 0.14442  
H -2.15296 -17.36701 0.63495  
H -3.24544 -16.63365 -0.54401  
C -1.46889 -14.58943 -1.29535  
H -0.37864 -12.38262 -1.81873  
H -0.90930 -12.21968 -2.76526  
H 0.61534 -11.91420 -1.93610  
C -2.27894 -14.75822 -2.53431  
H -3.23357 -15.23804 -2.29634  
H -2.50833 -13.78144 -2.97150  
H -1.73282 -15.37157 -3.27027  
C -1.21442 -15.91711 -0.65934  
H -0.95653 -16.66827 -1.42594  
H -0.33395 -15.81581 -0.01231  
C -2.41941 -16.41270 0.14442  
H -2.15296 -17.36701 0.63495  
H -3.24544 -16.63365 -0.54401  
C -1.46889 -14.58943 -1.29535  
H -0.37864 -12.38262 -1.81873  
H -0.90930 -12.21968 -2.76526  
H 0.61534 -11.91420 -1.93610  
C -2.27894 -14.75822 -2.53431  
H -3.23357 -15.23804 -2.29634  
H -2.50833 -13.78144 -2.97150  
H -1.73282 -15.37157 -3.27027  
C -1.21442 -15.91711 -0.65934  
H -0.95653 -16.66827 -1.42594  
H -0.33395 -15.81581 -0.01231  
C -2.41941 -16.41270 0.14442  
H -2.15296 -17.36701 0.63495  
H -3.24544 -16.63365 -0.54401

H -2.92012 -13.03560 3.23833  
H -2.72092 -11.56434 2.29550  
H -1.52300 -11.97714 3.58901  
C -1.00072 -14.48129 2.30636  
H -0.61116 -14.43716 3.33921  
H -0.18979 -14.87005 1.67746  
C -2.22356 -15.40347 2.27566  
H -1.91417 -16.43436 2.51632  
H -2.92510 -15.09654 3.06018  
C -0.18384 -12.32064 1.37316  
H -0.56486 -12.99561 0.93770  
H -0.29110 -11.82458 2.23711  
C -2.19206 -10.83014 -1.44657  
H -2.66281 -11.24481 -2.34507  
H -2.98419 -10.53646 -0.74204  
N -1.44752 -14.67678 -1.33208  
C -0.41920 -12.47875 -1.80835  
H -0.86173 -12.31398 -2.79760  
H -0.54132 -11.93880 -1.80441  
C -2.25997 -14.78677 -2.57243  
H -3.22663 -15.25000 -2.34996  
H -2.45723 -13.79232 -2.98449  
H -1.73542 -15.39460 -3.32983  
C -1.25256 -16.01838 -0.71964  
H -1.00651 -16.77850 -1.48163  
H -0.39483 -15.96013 -0.03709  
C -2.51724 -16.42634 0.02876  
H -2.35430 -17.38256 0.55571  
H -3.33102 -16.59479 -0.68870  
C -0.16825 -13.97443 -1.60213  
H -0.49468 -14.15314 -0.74618  
H -0.33921 -14.38579 -2.49338  
H -1.57747 -9.96017 -1.72879  
O -4.26277 -11.45559 0.68367  
O -4.11624 -12.74423 0.33632

45

<sup>18</sup>Fe No O<sub>2</sub> (2)

Fe -2.17501 -13.58397 0.13610  
C -3.35493 -15.40375 0.98132  
H -4.68956 -16.34330 1.45576  
H -4.73585 -15.36540 -0.04541  
H -4.77203 -14.55352 1.53207  
N -1.30811 -11.94102 -0.66533  
N -2.86521 -15.29405 0.96141  
N -1.38185 -13.07893 1.91154  
C -0.37097 -11.40252 0.38916  
H -0.83869 -10.50661 0.81823  
H -0.58321 -11.07536 -0.05377  
C -2.16690 -12.19164 2.81206  
H -3.11333 -12.67231 3.08100  
H -2.40255 -11.25112 2.30312  
H -1.60275 -11.96956 3.73449  
C -1.14116 -14.40694 2.55413  
H -0.90658 -14.29705 3.63052  
H -0.26660 -14.85857 2.06992  
C -2.37137 -15.29232 2.38396  
H -2.16014 -16.31397 2.74122  
H -3.18946 -14.90565 3.00582  
H -0.10634 -12.42347 1.49544  
H -0.56581 -13.21380 1.14025  
H -0.38566 -11.92100 2.35166  
C -2.26529 -10.85929 -1.04670  
H -2.98810 -11.25169 -1.77067  
H -2.81597 -10.53197 -0.15764  
N -1.51707 -14.66007 -1.42892  
C -0.60718 -12.41457 -1.91069  
H -1.28278 -12.21768 -2.75335  
H -0.31374 -11.83882 -2.10191  
C -2.43222 -14.87257 -2.58303  
H -3.35226 -15.36440 -2.24982  
H -2.70970 -13.90998 3.02547  
H -1.95087 -15.49748 -3.35528  
H -1.16888 -15.95836 -0.77789  
H -0.95132 -16.74031 -1.53216  
H -0.25609 -15.79504 -0.19307  
C -2.30978 -16.42340 0.12672  
H -1.96776 -17.25805 0.75912  
H -3.13296 -16.81460 -0.48486  
C -0.29651 -13.90625 -1.84989  
H -0.49162 -14.10775 -1.11425  
H -0.07034 -14.25139 -2.83578  
H -1.74529 -9.99032 -1.48757

45

<sup>18</sup>Fe No O<sub>2</sub> (4)

Fe -2.45324 -13.47227 0.09411  
C -4.46284 -15.52984 1.14615  
H -4.68773 -16.50420 1.61508  
H -4.94090 -15.49239 0.16098  
H -4.88605 -14.73137 1.76558  
N -1.37129 -11.83992 -0.72631

N -2.99595 -15.31735 0.99575  
N -1.34634 -13.07934 1.93138  
C -0.49053 -11.34001 0.37907  
H -1.03653 -10.52739 0.87693  
H -0.43525 -10.89519 -0.02731  
C -2.05605 -12.24351 2.92229  
H -2.99955 -12.72003 3.21212  
H -2.30189 -11.26894 2.48525  
H -1.44569 -12.08298 3.82916  
C -1.09990 -14.44438 2.44908  
H -0.76273 -14.43144 3.50343  
H -0.28568 -14.88689 1.86142  
C -2.36605 -15.30436 2.35550  
H -2.13779 -16.33092 2.69307  
H -3.11942 -14.90727 3.04828  
C -0.13071 -12.40482 1.42270  
H -0.52141 -13.17144 0.98667  
H -0.44358 -11.91871 2.23476  
C -2.21537 -10.71423 -1.21577  
H -2.90020 -11.07792 -1.98998  
H -2.81195 -10.31889 -0.38619  
N -1.48497 -14.68351 -1.43772  
C -0.59966 -12.40499 -1.88011  
H -1.22092 -12.26399 -2.77415  
H -0.33090 -11.83400 -2.04795  
C -2.28798 -14.92350 -2.65556  
C -3.22833 -15.42422 -2.39832  
H -2.54721 -13.97127 -3.13219  
H -1.74109 -15.54886 -3.38410  
C -1.21516 -15.94465 -0.71049  
H -0.93780 -16.76666 -1.39816  
H -0.35423 -15.77578 -0.05184  
C -2.44007 -16.38454 0.10158  
H -2.19018 -17.29149 0.68019  
H -3.24338 -16.66542 -0.59114  
C -0.26754 -13.89631 -1.74188  
H -0.45818 -14.06260 -0.93532  
H -0.21604 -14.23401 -2.67849  
H -1.60147 -9.89802 -1.63597

45

<sup>18</sup>Fe No O<sub>2</sub> (6)

Fe -2.80332 -13.34871 0.03831  
C -4.46813 -15.80447 1.07534  
H -4.62652 -16.77889 1.56900  
H -4.88745 -15.83962 0.06306  
H -5.00292 -15.02327 1.62828  
N -1.31432 -11.72740 -0.73108  
N -3.02678 -15.45542 1.00480  
H -1.44171 -13.10183 1.82757  
C -0.36670 -11.38007 0.36341  
H -0.77576 -10.50361 0.88197  
H -0.61332 -11.07269 -0.04188  
C -2.12978 -12.19153 2.77535  
H -3.06826 -12.64428 3.11254  
H -2.38872 -11.25101 2.27608  
H -1.49162 -11.97817 3.65130  
H -1.23243 -14.43660 2.44910  
H -0.92480 -14.33407 3.50533  
H -0.40138 -14.92841 1.92897  
C -2.48782 -15.30086 2.38071  
H -2.27473 -16.28587 2.83423  
H -3.28251 -14.84147 2.98330  
C -0.15759 -12.51305 1.37003  
H -0.43345 -13.32151 0.92374  
H -0.33023 -12.12577 2.22299  
C -2.08187 -10.52648 -1.14741  
H -2.83641 -10.82035 -1.88681  
H -2.60915 -10.10811 -0.28226  
N -1.53207 -14.61029 -1.34584  
C -0.67198 -12.33847 -1.92326  
H -1.37431 -12.21950 -2.75931  
H -0.24646 -11.78940 -2.20040  
C -2.36174 -14.92950 -2.53354  
H -3.29444 -15.41580 -2.22626  
H -2.63864 -14.00571 -3.05282  
H -1.81633 -15.59231 -3.22860  
C -1.13865 -15.84994 -0.62853  
H -0.76111 -16.61434 -1.33304  
H -0.30236 -15.59608 0.03404  
C -2.29830 -16.45000 0.16978  
H -1.91726 -17.28288 0.78651  
H -3.02620 -16.89002 -0.52344  
C -0.33887 -13.81697 -1.74699  
H -0.43474 -13.94919 -0.97993  
H -0.08821 -14.20190 -2.69037  
H -1.42353 -9.75392 -1.58122

47

<sup>18</sup>Fe Side-on (2)

Fe -2.45307 -13.47145 0.09499  
C -4.46326 -15.50147 1.12898

H -4.67095 -16.47078 1.60961  
H -4.93615 -15.46609 0.14248  
H -4.88049 -14.68641 1.72810  
N -1.40090 -11.86177 -0.70752  
N -2.99629 -15.28402 0.97201  
N -1.31100 -13.15642 1.79389  
C -0.49191 -11.34640 0.37636  
H -1.03704 -10.55452 0.90340  
H -0.40172 -10.87457 -0.06429  
C -2.07491 -12.31335 2.76215  
H -3.00888 -12.80856 3.03825  
H -2.34282 -11.35759 2.30521  
H -1.47037 -12.13508 3.66678  
C -1.06558 -14.49099 2.39189  
H -0.73077 -14.47206 3.44228  
H -0.25764 -14.97498 1.83151  
C -2.60066 -15.29898 2.33411  
H -2.18005 -16.33559 2.66334  
H -3.09026 -14.87085 3.03081  
C -0.08982 -12.43472 1.36767  
H -0.59823 -13.6109 0.91751  
H -0.43815 -11.97545 2.22431  
C -2.24029 -10.73342 -1.20308  
H -2.93376 -11.11075 -1.96099  
H -2.83489 -10.34159 -0.37198  
N -1.43942 -14.63730 -1.28586  
C -0.60661 -12.41175 -1.85977  
H -1.23406 -12.31210 -2.75324  
H -0.29269 -11.79804 -2.03291  
C -2.29550 -14.84159 -2.49330  
H -3.24093 -15.31384 -2.21535  
H -2.54447 -13.87984 -2.94825  
H -1.76837 -15.47283 -3.22777  
H -1.17488 -15.94763 -0.64261  
H -0.90410 -16.72093 -1.38401  
H -0.31898 -15.83208 0.03316  
C -2.43760 -16.37744 0.10077  
H -2.24949 -17.28563 0.69621  
H -3.21682 -16.63207 -0.62711  
C -0.22403 -13.87847 -1.67084  
H -0.53061 -14.01033 -0.88575  
H -0.25158 -14.26366 -2.60893  
H -1.61453 -9.93226 -1.62746  
O -4.03491 -12.59595 0.50426  
O -4.04801 -13.09840 -0.78251

47

<sup>18</sup>Fe Side-on (4)

Fe -2.65456 -13.39250 0.06227  
C -4.45354 -15.66407 1.27356  
H -4.63600 -16.64961 1.73425  
H -4.97594 -15.60978 0.31247  
H -4.86088 -14.87951 1.92029  
N -1.29245 -11.76387 -0.77489  
N -3.00382 -15.42038 1.05671  
N -1.39303 -13.12429 1.78434  
C -0.47145 -11.29351 0.37148  
H -1.04061 -10.49887 0.87130  
H -0.47244 -10.83627 0.02480  
C -2.14563 -12.31351 2.78233  
H -3.08734 -12.80867 3.03689  
H -2.39677 -11.33705 2.35747  
H -1.54498 -12.17219 3.69661  
C -1.06943 -14.46056 2.35215  
H -0.67962 -14.36720 3.38187  
H -0.26362 -14.88899 1.74578  
C -2.29189 -15.37841 2.36208  
H -1.98336 -16.39024 2.67926  
H -3.00982 -15.02304 3.11185  
C -0.15784 -12.40084 1.37562  
H -0.53421 -13.13309 0.94457  
H -0.34869 -11.96298 2.25407  
C -2.08787 -10.63473 -1.32215  
H -2.75784 -11.00763 -2.10436  
H -2.70791 -10.21036 -0.52526  
N -1.51879 -14.60624 -1.30183  
C -0.50053 -12.40116 -1.86106  
H -1.06406 -12.26330 -2.79231  
H -0.46810 -11.88978 -2.00230  
C -2.33789 -14.79744 -2.53240  
H -3.28786 -15.27825 -2.28044  
H -2.57634 -13.82853 -2.98107  
H -1.79525 -15.41783 -3.26546  
C -1.24504 -15.92691 -0.67007  
H -0.96992 -16.67578 -1.43367  
H -0.37509 -15.81320 -0.01191  
C -2.46000 -16.42876 0.10978  
H -2.19802 -17.36636 0.63206  
H -3.26502 -16.67506 -0.59422  
C -0.25584 -13.89491 -1.63829  
H -0.45062 -14.06244 -0.81609  
H -0.20628 -14.32232 -2.54632

H -1.43986 -9.84591 -1.74014  
O -4.18043 -12.47109 0.46347  
O -4.23950 -13.08357 -0.79659

47

<sup>18</sup>Fe Side-on (6)

Fe -2.67276 -13.38925 0.05762  
C -4.44755 -15.58989 1.26494  
H -4.63966 -16.56573 1.74074  
H -4.97964 -15.53771 0.30940  
H -4.83006 -14.78705 1.90408  
N -1.31952 -11.81360 -0.77716  
N -2.99130 -15.38006 1.02886  
N -1.37111 -13.08041 1.88141  
C -0.53720 -11.28244 0.37643  
H -1.16224 -10.51887 0.85755  
H -0.37837 -10.77371 0.02737  
C -2.08846 -12.30134 2.91854  
H -3.02390 -12.80161 3.18845  
H -2.35369 -11.31344 2.52832  
H -1.46308 -12.18254 3.82008  
C -1.04706 -14.44641 2.36282  
H -0.64147 -14.42468 3.39096  
H -0.25099 -14.84544 1.72188  
C -2.27099 -15.36607 2.33683  
H -1.96341 -16.38617 2.62444  
H -2.98984 -15.03095 3.09487  
C -0.16764 -12.34944 1.40653  
H -0.52584 -13.07989 0.97164  
H -0.36602 -11.86991 2.24642  
C -2.13674 -10.71226 -1.35933  
H -2.75940 -11.10799 -2.16840  
H -2.80486 -10.31292 -0.58903  
N -1.49355 -14.66756 -1.38927  
C -0.47720 -12.43200 -1.84350  
H -0.99853 -12.27354 -2.79567  
H -0.49328 -11.91364 -1.92854  
C -2.27437 -14.84902 -2.63750  
H -3.23260 -15.33131 -2.41765  
H -2.49932 -13.87740 -3.08953  
H -1.71668 -15.46566 -3.36341  
C -1.26055 -15.97105 -0.71410  
H -1.00095 -16.75756 -1.44500  
H -0.39255 -15.86044 -0.05118  
C -2.49182 -16.41375 0.07863  
H -2.27069 -17.35939 0.60418  
H -3.31197 -16.62481 -0.61961  
C -0.23054 -13.93206 -1.64800  
H -0.43666 -14.10715 -0.79416  
H -0.28771 -14.32729 -2.54056  
H -1.49734 -9.90351 -1.75027  
O -4.27779 -12.37875 0.58064  
O -4.38421 -12.97537 -0.69521

47

<sup>18</sup>Fe End-on (2)

Fe -2.46728 -13.48188 0.07711  
C -4.42882 -15.53816 1.24318  
H -4.62475 -16.50221 1.74041  
H -4.97910 -15.50215 0.29687  
H -2.48740 -14.71622 1.87085  
N -1.39125 -11.92414 -0.78736  
N -2.97704 -15.35193 0.97243  
N -1.36300 -13.14519 1.78059  
C -0.68068 -11.27894 0.36418  
H -1.40263 -10.60705 0.84431  
H -0.15860 -10.65974 0.00498  
C -2.17382 -12.39804 2.78437  
H -2.94483 -13.05063 3.20254  
H -2.69624 -11.55998 2.30402  
H -1.52641 -12.03642 3.59885  
C -0.99498 -14.48859 2.29765  
H -0.60521 -14.43239 3.32961  
H -0.18518 -14.87933 1.66902  
C -2.22060 -15.40561 2.27229  
H -1.91763 -16.44034 2.50216  
H -2.91776 -15.10092 3.06125  
C -0.19772 -12.31790 1.36554  
H -0.56085 -12.97851 0.92636  
H -0.26493 -11.81876 2.23404  
C -2.22514 -10.88465 -1.45933  
H -2.71710 -11.32842 -2.33255  
H -2.99842 -10.54939 -0.75498  
N -1.42740 -14.66476 -1.31429  
C -0.41671 -12.48385 -1.79620  
H -0.84538 -12.31265 -2.79047  
H -0.52994 -11.92192 -1.76747  
C -2.25591 -14.76479 -2.54744  
H -3.23245 -15.20025 -2.31264  
H -2.42936 -13.76997 -2.96831  
H -1.75449 -15.39334 -3.30335  
C -1.24544 -16.01336 -0.71362

H -1.00395 -16.76860 -1.48200  
H -0.38977 -15.96808 -0.02786  
C -2.51866 -16.41439 0.02425  
H -2.36825 -17.37263 0.55050  
H -3.32941 -16.57446 -0.69836  
C -0.14804 -13.97479 -1.60267  
H -0.52454 -14.15752 -0.75542  
H -0.34578 -14.38189 -2.50415  
H -1.60435 -10.03565 -1.78825  
O -4.22538 -11.42749 0.69317  
O -3.96200 -12.69319 0.40271

47

<sup>18</sup>Fe End-on (4)

Fe -2.59115 -13.47151 -0.00180  
C -4.43435 -15.59500 1.22235  
H -4.62348 -16.55402 1.73216  
H -4.97378 -15.58773 0.26837  
H -4.81448 -14.76956 1.83290  
N -1.36665 -11.88815 -0.84097  
N -2.98080 -15.39197 0.97120  
N -1.38450 -13.11454 1.85012  
C -0.68096 -11.28550 0.34194  
H -1.40643 -10.60980 0.80897  
H -0.17826 -10.67382 0.01612  
C -2.12996 -12.36592 3.89025  
H -2.97147 -12.96420 2.25220  
H -2.56015 -11.45165 2.46591  
H -1.46793 -12.12081 3.73818  
C -1.02768 -14.47047 2.31698  
H -0.62981 -14.45936 3.34877  
H -0.22248 -14.85030 1.67504  
C -2.24779 -15.39722 2.27915  
H -1.94062 -16.42307 2.54364  
H -2.96278 -15.07562 3.04588  
C -0.22750 -12.32099 1.37087  
H -0.51549 -13.00653 0.94190  
H -0.27096 -11.79826 2.06059  
C -2.19963 -10.83922 -1.49347  
H -2.68173 -11.25950 -2.38420  
H -2.98119 -10.52429 -0.78742  
N -1.45614 -14.67796 -1.35581  
C -0.41527 -12.47740 -1.83693  
H -0.84404 -12.31508 -2.83325  
H -0.54829 -12.49720 -1.82342  
C -2.24449 -14.81662 -2.60925  
H -3.19556 -15.31916 -2.40346  
H -2.47150 -13.83007 -3.02755  
H -1.68610 -15.40186 -3.35978  
C -1.24188 -16.01053 -0.72533  
H -0.97983 -16.77151 -1.48078  
H -0.38558 -17.07509 -0.04435  
C -2.49326 -16.44438 0.03238  
H -2.30112 -17.39237 0.56299  
H -3.30438 -16.63973 -0.68122  
C -0.17364 -13.97259 -1.61868  
H -0.47769 -14.14287 -0.75275  
H -0.34342 -14.39555 -2.49847  
H -1.58527 -9.97513 -1.79498  
O -4.20742 -11.32777 0.76785  
O -4.03657 -12.62613 0.5776

C 1.26376 -1.32593 -2.40176  
H 1.25442 -0.56860 -3.19668  
H 2.03927 -2.05693 -2.67458  
C -1.69035 -0.15288 -2.46593  
H -2.38016 0.48079 -1.89839  
H -0.91303 0.49206 -2.88887  
H -2.24232 -0.63718 -3.29077  
C -2.13609 -2.01053 -0.91847  
H -2.94201 -2.25794 -1.63526  
H -1.65981 -2.94779 -0.60823  
C -2.71522 -1.29288 0.29947  
H -3.29492 -1.99941 0.91215  
H -3.41356 -0.50653 -0.01709  
C -0.09538 -2.02143 -2.31007  
H 0.00345 -2.96075 -1.75391  
H -0.46780 -2.26313 -3.32372  
H 2.91139 0.82350 -2.01538

45  
I<sup>Co</sup> No O<sub>2</sub> (3)  
Co -0.00951 -0.19050 0.00096  
C -2.40329 0.85433 1.62056  
H -3.30197 0.65162 2.23062  
H -2.69574 1.43977 0.74170  
H -1.70054 1.45185 2.21197  
N 1.71481 -0.39428 -1.17327  
H 1.73258 -0.39880 1.17613  
N 1.02300 -1.24800 1.51120  
C 2.67739 -1.16967 -0.32452  
H 3.32227 -0.43673 0.17749  
H 3.34005 -1.79277 -0.95029  
C 1.70293 -0.38185 2.50068  
H 0.97705 0.27396 2.99395  
H 2.43853 0.25873 2.00261  
H 2.21835 -0.98249 3.27111  
C -0.05344 -2.03965 2.14557  
H 0.26576 -2.47063 3.11413  
H -0.28805 -2.88344 1.48463  
C -1.28756 -1.16239 2.38677  
H -2.10975 -1.78125 2.78706  
H -1.04844 -0.42085 3.16013  
C 1.99869 -2.04515 0.73652  
H 1.45920 -2.88062 0.27163  
H 2.78199 -2.48620 1.38281  
C 2.37870 0.86048 -1.62345  
H 1.67288 1.45112 -2.21808  
H 2.66754 1.45189 -0.74738  
N -1.03593 -1.26002 -1.50449  
C 1.27431 -1.16581 -2.38050  
H 1.03167 -0.42925 -3.15751  
H 2.09987 -1.78235 -2.77745  
C -1.72064 -0.40192 -2.49770  
H -2.46148 0.23494 -2.00269  
H -0.99807 0.25737 -2.99207  
H -2.23072 -1.00878 -3.26681  
C -2.00714 -2.05941 -0.72644  
H -2.78770 -2.50789 -1.37090  
H -1.46269 -2.88950 -0.25782  
C -2.69089 -1.18345 0.33100  
H -3.34948 -1.80799 0.95960  
H -3.34040 -0.45646 -0.17371  
C 0.04474 -2.04849 -2.13568  
H 0.28398 -2.88828 -1.47142  
H -0.27221 -2.48499 -3.10250  
H 3.27874 0.65979 -2.23218

45  
I<sup>Co</sup> No O<sub>2</sub> (5)  
Co -0.01026 0.16833 0.00025  
C -2.59520 0.77878 1.55272  
H -3.47930 0.55543 2.17495  
H -2.91506 1.27739 0.63066  
H -1.93367 1.46957 2.08852  
N 1.82633 -0.04960 -1.21060  
N -1.84360 -0.45445 1.21365  
N 0.96775 -1.16345 1.45329  
C 2.66681 -1.34580 -0.37189  
H 3.43759 -0.72584 0.10239  
C 3.20324 -2.08608 -0.99018  
C 1.74085 -3.31059 2.38920  
H 1.06188 0.36291 2.92278  
H 2.44597 0.31741 1.83475  
H 2.29252 -0.92980 3.11842  
C -0.07403 -1.92776 1.9438  
H 0.32203 -2.29975 3.15556  
C -0.33553 -2.81332 1.60184  
C -1.30976 -1.07414 2.45174  
H -0.07941 -1.68209 2.95999  
H -1.05298 -0.25370 3.13463  
C 1.86524 -2.07953 0.70273  
H 1.23579 -2.85400 0.24803  
H 2.56299 -2.59686 1.38626

C 2.57105 0.78638 -1.55493  
H 1.90572 1.47104 -2.09387  
H 2.88782 1.29077 -0.63496  
N -0.98100 -1.17501 -1.44696  
C 1.29594 -1.07745 -2.44601  
H 1.03463 -0.26138 -3.13238  
H 2.06887 -1.68331 -2.95176  
C -1.75912 -0.33083 -2.38659  
H -2.46806 0.29524 -1.83484  
H -1.08423 0.34443 -2.92310  
H -2.30698 -0.95669 -3.11298  
C -1.87335 -2.09289 -0.69250  
H -2.56811 -2.61699 -1.37391  
H -1.23963 -2.86176 -0.23442  
C -2.67913 -1.35899 0.37885  
H -3.21132 -2.09942 1.00060  
H -3.45329 -0.74548 -0.09831  
C 0.06493 -1.93671 -2.18490  
H 0.33126 -2.81834 -1.58874  
H -0.32911 -2.31499 -3.14446  
H 3.45653 0.56529 -2.17599

47  
I<sup>Co</sup> Side-on (1)  
Co -0.00956 -0.16812 0.00097  
C -2.34427 0.87844 1.51931  
H -3.23108 0.68485 2.14257  
H -2.62196 1.41805 0.60956  
H -1.61677 1.49421 2.05617  
N 1.67094 -0.40125 -1.13006  
N -1.68881 -0.40569 1.13270  
N 0.95322 -1.27277 1.41729  
C 2.65193 -1.21452 -0.32342  
H 3.30953 -0.50440 0.19006  
H 3.29174 -1.81258 -0.99082  
C 1.65022 -0.36453 2.37817  
H 0.92698 0.28508 2.87640  
H 2.34428 0.29030 1.84667  
H 2.19467 -0.95986 3.12934  
C -0.08532 -2.05226 2.13716  
H 0.29316 -2.44353 0.30970  
H -0.35667 -2.91845 1.52106  
C -1.27331 -1.13205 2.38403  
H -1.24496 -1.69115 2.80300  
H -1.00090 -0.36756 3.12004  
C 1.95257 -2.10174 0.69942  
H 1.42466 -2.93683 0.22225  
H 2.69652 -2.53608 1.39067  
C 2.31941 0.88471 -1.52253  
H 1.58902 1.49360 -2.06326  
H 2.59320 1.43044 -0.61524  
H -0.96602 -1.28416 -1.41056  
C 1.25971 -1.13559 -2.37810  
H 0.98333 -0.37604 -3.11773  
H 2.11440 -1.69216 -2.79425  
C -1.66787 -0.38389 -2.37536  
H -2.36681 0.26810 -1.84679  
H -0.94819 0.26865 -2.87491  
H -2.20756 -0.98547 -3.12498  
C -1.96083 -2.11566 -0.68930  
H 1.42466 -2.93683 0.22225  
H -1.42813 -2.94550 -0.20852  
C -2.66527 -1.22831 0.32995  
H -3.30083 -1.82768 1.00022  
H -3.32765 -0.52445 -0.18603  
C 0.07670 -2.06110 -2.12713  
H 0.35298 -2.92301 -1.50735  
H -0.29975 -2.45859 -3.08611  
H 3.20784 0.69296 -2.14405  
O -0.40540 1.55614 -0.59349  
O 0.37673 1.56106 0.58757

47  
I<sup>Co</sup> Side-on (3)  
Co -0.01337 0.02385 -0.00360  
C -2.63726 0.78085 1.62783  
H -3.50680 0.52520 2.25768  
H -2.98513 1.30204 0.72923  
H -1.98169 1.46559 2.17751  
N 1.84837 -0.41330 -1.22397  
N -1.86297 -0.41830 1.23206  
N 0.93145 -1.19874 1.39767  
C 2.67895 -1.31067 -0.37634  
H 3.42311 -0.68471 0.13118  
H 3.24878 -2.02873 -0.99293  
C 1.68563 -0.32329 2.34081  
H 0.99371 0.33345 2.87577  
H 2.38388 0.31474 1.79217  
H 2.24153 -0.93751 3.06885  
C -0.09982 -1.96185 2.15261  
H 0.31191 -2.33616 3.10628  
H -0.37250 -2.84512 1.56321

C -1.32232 -1.08946 2.44091  
H -2.09599 -1.70349 2.93764  
H -1.04737 -0.29775 3.14963  
C 1.87274 -2.08832 0.67134  
H 1.27965 -2.88453 0.20730  
H 2.57339 -2.57808 1.31553  
C 2.61906 0.78791 -1.62054  
H 1.96459 1.46580 -2.17982  
H 2.95643 1.31636 -0.72216  
N -0.94757 -1.20685 -1.39571  
C 1.31017 -1.08837 -2.43202  
H 1.03139 -0.29895 -3.14189  
H 2.08654 -1.69954 -2.92809  
C -1.70916 -0.34748 -2.34730  
H -2.41485 0.28785 -1.80506  
H -1.02291 0.31138 -2.88702  
H -2.25770 -0.97359 -3.07061  
C -1.88142 -2.09783 -0.66083  
H -2.58115 -2.59581 -1.35608  
H -1.28230 -2.88775 -0.19400  
C -2.69005 -1.31978 0.38503  
H -3.25834 -2.03842 1.00239  
H -3.43554 -0.69691 -0.12444  
C 0.09181 -1.96679 -2.14332  
H 0.36822 -2.84566 -1.54920  
H -0.31386 -2.34832 -3.09670  
H 3.49501 0.53358 -2.24202  
O -0.38745 1.72512 -0.57763  
O 0.34493 1.76273 0.55626

47  
I<sup>Co</sup> End-on (1)  
Co -2.48047 -13.51883 0.00947  
C -4.44536 -15.56383 1.15485  
H -4.63834 -16.51262 1.68160  
H -4.97497 -15.57206 0.19585  
H -4.82898 -14.72570 1.74540  
N -1.41730 -11.93632 -0.84190  
N -2.99135 -15.36460 0.91077  
N -1.36234 -13.13976 1.80826  
C -0.72284 -11.30102 0.32404  
H -1.45946 -10.64677 0.80643  
H 0.10550 -10.66246 -0.02740  
C -2.10980 -12.39739 2.85378  
H -2.95912 -12.98958 3.20556  
H -2.52429 -11.47123 2.44232  
H -1.44658 -12.17171 3.70558  
C -1.02159 -14.49793 2.27688  
H -0.63542 -14.49232 3.31333  
H -0.21742 -14.88790 1.64099  
C -2.26517 -15.39210 2.22806  
H -1.98943 -16.42739 2.48872  
H -2.97716 -15.05607 2.99106  
C -0.21822 -12.32625 1.33697  
H 0.53426 -12.99294 0.89667  
H 0.27235 -11.79742 2.17364  
C -2.24229 -10.89590 -1.51711  
H -2.74004 -11.33792 -2.38809  
C -3.00686 -10.54730 -0.81221  
N -1.41106 -14.68649 -1.32473  
C -0.43173 -12.49556 -1.83437  
H -0.85563 -12.34496 -2.83422  
H 0.50819 -11.92159 -1.80859  
C -2.23918 -14.79481 -2.55821  
H -3.20757 -15.24922 -2.32641  
H -2.42973 -13.80213 -2.97665  
H -1.72629 -15.41135 -3.31621  
C -1.21815 -16.03122 -0.72434  
H -0.95921 -16.78380 -1.48961  
H -0.37323 -15.97385 -0.02717  
C -2.49950 -16.43995 -0.00497  
H -2.34635 -17.38424 0.54452  
H -3.29236 -16.62782 -0.74036  
C -0.14243 -13.98145 -1.61765  
H 0.53056 -14.14300 -0.76714  
H 0.35834 -14.39447 -2.51213  
H -1.61917 -10.05000 -1.85084  
O -1.38335 -11.44405 0.77817  
O -3.99900 -12.72591 0.54130

47  
I<sup>Co</sup> End-on (3)  
Co -2.48773 -13.53539 -0.00071  
C -4.44373 -15.55652 1.15570  
H -4.46364 -16.51330 1.66523  
H -4.97166 -15.54240 0.19825  
H -4.81705 -14.72596 1.76268  
N -1.41799 -11.93936 -0.84871  
N -2.98754 -15.36834 0.91129  
N -1.37249 -13.12095 1.83897  
C -0.74507 -11.29492 0.32362  
H -1.49725 -10.65093 0.79610

H 0.07867 -10.64615 -0.02026  
C -2.10128 -12.39570 2.90683  
H -2.96042 -12.98288 3.24486  
H -2.50268 -11.45476 2.51827  
H -1.43284 -12.20538 3.76373  
C -1.02215 -14.48604 2.27798  
H -0.62538 -14.49839 3.31052  
H -0.22088 -14.86274 1.62963  
C -2.25786 -15.39209 2.22710  
H -1.97236 -16.42557 2.48391  
H -2.97154 -15.06360 2.99178  
C -0.23723 -12.30751 1.34836  
H 0.51638 -12.97664 0.91245  
H 0.25812 -11.76602 2.17408  
C -2.24686 -10.90857 -1.53588  
H -2.74760 -11.36286 -2.39894  
H -3.00941 -10.54929 -0.83477  
N -1.42234 -14.69459 -1.34651  
C -0.42554 -12.49888 -1.83180  
H -0.83792 -12.34173 -2.83566  
H 0.51858 -11.93221 -1.79431  
C -2.23431 -14.80844 -2.58983  
H -3.20330 -15.26770 -2.36932  
H -2.42348 -13.81683 -3.01189  
H -1.70872 -15.42380 -3.33975  
C -1.22848 -16.03752 -0.73615  
H -0.96851 -16.79266 -1.49811  
H -0.38270 -15.97384 -0.04041  
C -2.50502 -16.44489 -0.00866  
H -2.35018 -17.39011 0.53862  
H -3.30396 -16.62919 -0.73866  
C -0.14780 -13.98696 -1.61892  
H 0.51177 -14.15342 -0.75885  
H 0.36413 -14.40035 -2.50666  
H -1.62386 -10.06826 -1.88397  
O -0.46801 -11.42350 0.82236  
O -3.97091 -12.69406 0.50031

47  
I<sup>Co</sup> End-on (5)  
Co -0.03979 -0.00530 -0.04388  
C -2.60365 0.79106 1.52552  
H -3.46389 0.56284 2.17767  
H -2.96618 1.27495 0.61206  
H -1.93581 1.49401 2.03582  
N 1.78064 -0.43038 -1.23715  
N -1.84146 -0.43332 1.17006  
N 0.97354 -1.17151 1.45825  
C 2.64998 -1.29024 -0.38256  
H 3.38047 -0.63199 0.10353  
H 3.23040 -2.00159 -0.99566  
H 2.74996 -0.35442 2.42634  
H 1.07757 0.31292 2.97220  
H 2.46646 0.28041 1.89815  
H 2.28321 -1.00905 3.13689  
C -0.08858 -1.93249 2.17319  
H 0.28379 -2.31492 3.13942  
H -0.35009 -2.81274 1.57181  
C -1.31586 -1.05788 2.41484  
H -2.09792 -1.65215 2.92087  
H -1.04997 -0.23757 3.09415  
C 1.87749 -2.06498 0.68793  
H 1.26168 -2.85082 0.23191  
H 2.59630 -2.57326 1.35549  
C 2.51760 0.80232 -1.61675  
H 1.87177 1.43834 -2.23153  
H 2.77278 1.36283 -0.71048  
N -0.99567 -1.25937 -1.47470  
C 1.28453 -1.12153 -2.45810  
H 1.01457 -0.33917 -3.17955  
H 2.08104 -1.72399 -2.93030  
C -1.75562 -0.39902 -2.41748  
H -2.46426 0.23285 -1.87198  
H -1.07031 0.26138 -2.95923  
H -2.31007 -1.01393 -3.14692  
C -1.90796 -2.14075 -0.70302  
H -2.62421 -2.65719 -1.36777  
H -1.29096 -2.91793 -0.23583  
C -2.69032 -1.35371 0.35766  
H -3.23403 -2.06613 1.00199  
H -3.45512 -0.74148 -0.13636  
C 0.06635 -2.01092 -2.09611  
H 0.34139 -2.88013 -1.58600  
H -0.30883 -2.40742 -3.15606  
H 3.43884 0.57228 -2.17857  
O -0.10456 1.85647 -0.13043  
O 0.59850 2.03901 0.98430

45  
I<sup>Ni</sup> No O<sub>2</sub> (2)  
Ni -0.00997 -0.37298 0.00030  
C -2.19514 0.88438 1.60926

H -3.10623 0.79318 2.22614  
H -2.42048 -1.49839 0.73012  
H -1.42027 1.39384 2.19295  
N 1.66997 -0.44071 -1.16709  
N -1.68916 -0.44393 1.16868  
N 1.07950 -1.18796 1.58752  
C 2.69938 -1.09365 -0.29723  
H 3.28988 -0.28962 0.16052  
H 3.40045 -1.70033 -0.89587  
C 1.71692 -0.34042 2.61645  
H 0.96286 0.28242 3.11088  
H 2.44454 0.33344 2.15067  
H 2.23215 -0.94946 3.38151  
C 0.01172 -2.04344 2.16473  
H 0.31719 -2.47905 3.13537  
H -0.15147 -2.88105 1.47415  
C 1.29076 -1.25458 2.36755  
H -2.09534 -1.95117 2.65584  
H -1.16660 -0.55849 3.20720  
C 0.28493 -1.95709 0.80937  
H 1.57956 -2.82822 0.37220  
H 2.89563 -2.34308 1.45571  
C 2.16895 0.88831 -1.61337  
H 1.39130 1.39138 -2.19890  
H 2.39142 1.50711 -0.73684  
N -1.09487 -1.20109 -1.58257  
C 1.27570 -1.25860 -2.36233  
H 1.14749 -0.56669 -3.20485  
H 2.08391 -1.95202 -2.64807  
C -1.73695 -0.36215 -2.61567  
H -2.46993 0.30904 -2.15351  
H -0.98648 0.26335 -3.11219  
H -2.24761 -0.97788 -3.37842  
C -2.09612 -1.97182 -0.80050  
H -2.90469 -2.36533 -1.44493  
H -1.58595 -2.83793 -0.35892  
C -2.71512 -1.10604 0.30174  
H -3.41358 -1.71309 0.90306  
H -3.30929 -0.30709 -0.16019  
C -0.02248 -2.05352 -2.15583  
H 0.14501 -2.88702 -1.46133  
H -0.32560 -2.49521 -3.12445  
H 3.08032 0.79929 -2.23017

45  
I<sup>Ni</sup> No O<sub>2</sub> (4)  
Ni -0.01103 0.08585 -0.00031  
C -2.63268 0.79752 1.57642  
H -3.51199 0.55847 2.20009  
H -2.96025 -1.30108 0.65979  
H -1.97555 1.49101 2.11388  
N 1.84515 -0.41348 -1.21930  
N -1.86454 -0.41755 1.22065  
N 0.94054 -1.16852 1.41340  
C 2.67127 -1.32258 -0.37932  
H 3.43710 -0.71089 0.11274  
H 3.21536 -2.05607 -1.00001  
C -1.69651 -0.26818 2.32209  
H 1.00408 0.39610 2.84864  
H 2.37575 0.36864 1.74660  
H 2.71225 -0.36663 3.05589  
C -0.09364 -1.91982 2.17698  
H 0.31699 -2.28017 3.13630  
H -0.36350 -1.81162 1.59825  
C -1.31885 -1.05073 2.44691  
H -2.08811 -1.65509 2.96109  
H -1.04744 -0.23717 3.13170  
C 1.86084 -2.07464 0.67967  
H 1.24822 -2.85996 0.22127  
H 2.55562 -2.57775 1.37623  
C 2.60691 0.80399 -1.58053  
H 1.94618 1.49148 -2.12127  
H 2.93160 1.31348 -0.66615  
N -0.95590 -1.18002 -1.40829  
C 1.30272 -1.05492 -2.44265  
H 1.02690 -0.24591 -3.13102  
H -2.07506 -1.65749 -2.95430  
C -1.71682 -0.28819 -2.32124  
H -2.39949 0.34765 -1.74876  
H -1.02803 0.37726 -2.85105  
H -2.28832 -0.88748 -3.05202  
C -1.87142 -2.08760 -0.67044  
H -2.56342 -2.59754 -1.36480  
H -1.25473 -2.86740 -0.20828  
C -2.68600 -1.33474 0.38480  
H -3.22642 -2.06788 1.00906  
H -3.45468 -0.72923 -0.11047  
C 0.08218 -1.92929 -2.16856  
H 0.35684 -2.81701 -1.58589  
H -0.32660 -2.29630 3.12615  
H 3.48760 0.56675 -2.20295

47  
I<sup>Ni</sup> Side-on (2)  
Ni -0.01113 -0.03475 0.00027  
C -2.53473 0.84412 1.53882  
H -3.41071 0.64809 2.17957  
H -2.85553 1.33874 0.61652  
H -1.84005 1.51993 2.04902  
N 1.79870 -0.40453 -1.19465  
N -1.81816 -0.40859 1.19594  
N 0.94327 -1.19098 1.41787  
C 2.66498 -1.29314 -0.36865  
H 3.41028 -0.65804 0.12486  
H 3.22865 -1.99878 -1.00285  
C 1.69285 -0.30125 2.34996  
H 0.99813 0.36178 2.87288  
H 2.38693 0.33390 1.79309  
H 2.24906 -0.90603 3.08531  
C -0.09474 -1.94795 2.16938  
H 0.30734 -2.31885 3.12798  
H -0.36813 -2.83165 1.57945  
C -1.30927 -1.06006 2.43168  
H -2.10161 -1.65052 2.92477  
H -1.03391 -0.25725 3.12682  
C 1.88222 -2.07995 0.68702  
H 1.28812 -2.87854 0.22613  
H 2.59033 -2.56534 1.38196  
C 2.50864 0.85036 -1.54322  
H 1.81032 1.52016 -2.05636  
H 2.82695 1.35077 -0.62319  
N -0.95865 -1.20252 -1.41259  
C 1.29310 -1.06416 -2.42728  
H 1.01338 -0.26604 -3.12604  
H 2.08841 -1.65271 -2.91789  
H -1.71292 -0.32119 -2.34884  
H -2.41096 0.31222 -1.79496  
H -1.02173 0.34362 -2.87414  
H -2.26521 -0.93247 -3.08177  
C -1.89291 -2.09313 -0.67776  
H -2.59828 -2.58548 -1.37059  
H -1.29459 -2.88622 -0.21306  
C -2.67998 -1.30545 0.37399  
H -3.24008 -2.01078 1.01165  
H -3.42831 -0.67644 -0.12273  
C 0.08337 -1.95733 -2.16066  
H 0.36164 -2.83671 -1.56666  
H -0.31677 -2.33497 -3.11743  
H 3.38558 0.65604 -2.18319  
O -0.38229 1.70513 -0.58864  
O 0.35211 1.70979 0.58032

47  
I<sup>Ni</sup> Side-on (4)  
Ni -0.01076 -0.03065 -0.00003  
C -2.53846 0.83626 1.54749  
H -3.42221 0.60798 2.16680  
H -2.86028 1.34992 0.63525  
H -1.87558 1.51282 2.09753  
N 1.77159 -0.39066 -1.18154  
N -1.79133 -0.39459 1.18272  
N 0.97990 -1.20618 1.47150  
C 2.65182 -1.27847 -0.35988  
H 3.39356 -0.63659 0.13104  
H 3.21890 -1.97186 -1.00406  
C 1.73664 -0.35077 2.41846  
H 1.05196 0.31662 2.95063  
H 2.44731 0.28095 1.87706  
H 2.28307 -0.96878 3.15195  
C -0.08359 -1.95276 2.18625  
H 0.27750 -2.34096 3.15541  
H -0.35739 -2.82652 1.58140  
C -1.29513 -1.05282 2.42603  
H -2.09987 -1.63316 2.91071  
H -1.02063 -0.25097 3.12343  
C 1.89403 -2.08084 0.70274  
H 1.28710 -2.86901 0.24003  
H 2.62641 -2.58377 1.36114  
C 2.51224 0.84239 -1.55219  
H 1.84579 1.51283 -2.10536  
H 2.83146 1.36196 -0.64239  
N -0.99507 -1.21816 1.46605  
C 1.27900 -1.05729 -2.42174  
H 1.00039 -0.26024 -3.12296  
H 2.08675 -1.63577 -2.90361  
C -1.75638 -0.37094 -2.41672  
H -2.47086 0.25874 -1.87801  
H -1.07536 0.29826 -2.95129  
H -2.29896 -0.99517 -3.14779  
C -1.90461 -2.09417 -0.69351  
H -2.63413 -2.60401 -1.34979  
H -1.29355 -2.87681 -0.22710  
C -2.66686 -1.29104 0.36533  
H -3.22984 -1.98448 1.01303

H -3.41227 -0.65567 -0.12854  
C 0.07243 -1.96240 -2.17770  
H 0.35058 -2.83203 -1.56913  
H -0.28718 -2.35668 -3.14507  
H 3.39713 0.61574 -2.17048  
O -0.37188 1.89918 -0.56231  
O 0.34063 1.90345 0.55344

47  
I<sup>Ni</sup> End-on (2)  
Ni -2.50570 -13.56023 -0.10534  
C -4.45535 -15.52503 1.06392  
H -4.65756 -16.45035 1.62697  
H -4.96113 -15.57595 0.09349  
H -4.85056 -14.66431 1.61272  
N -1.45284 -11.97532 -0.85931  
N -2.99461 -15.33712 0.85096  
N -1.30427 -13.08246 1.97880  
C -0.79371 -11.32724 0.32713  
H -1.56822 -10.71547 0.80635  
H -0.00507 -10.64260 -0.02928  
C -1.95253 -12.35702 3.07860  
H -2.81669 -12.91883 3.45042  
H -2.33650 -11.39249 2.72834  
H -1.25188 -12.18728 3.91786  
C -1.03407 -14.48123 2.30699  
H -0.64978 -14.61020 3.33927  
H -0.24603 -14.85350 1.63980  
C -2.31109 -15.32883 2.19612  
H -2.09634 -16.36696 2.50044  
H -3.04410 -14.93683 2.91150  
C -0.22576 -12.30419 1.36362  
H 0.50284 -12.98956 0.91042  
H 0.33555 -11.71081 2.11127  
C -2.28408 -10.94454 -1.54228  
H -2.75544 -11.38508 -2.42799  
H -3.06357 -10.60831 -0.84876  
N -1.40849 -14.71067 -1.37731  
C -0.44190 -12.50644 -1.84123  
H -0.85340 -12.35589 -2.84624  
H 0.48688 -11.91666 -1.79265  
C -2.28408 -10.94454 -1.54228  
H -3.14307 -15.34071 -2.43984  
H -2.38115 -13.88277 -3.08324  
H -1.61485 -15.47667 -3.36415  
C -1.20399 -16.03785 -0.73747  
H -0.92532 -16.80226 -1.48266  
H -0.37005 -15.95087 -0.03087  
C -2.48745 -16.43954 -0.02400  
H -2.33527 -17.36342 0.55839  
H -3.27068 -16.65291 -0.76239  
C -1.13822 -13.98610 -1.62564  
H 0.50888 -14.14031 -0.75464  
H 0.39311 -14.39304 -2.50395  
H -1.66657 -10.08556 -1.85127  
O -0.06325 -11.46871 0.82925  
O -0.397359 -12.74041 0.59631

47  
I<sup>Ni</sup> End-on (4)  
Ni -2.44754 -13.52547 0.06601  
C -4.40814 -15.58852 1.22414  
H -4.61682 -16.56423 1.69458  
H -4.95117 -15.52603 0.27493  
H -4.77137 -14.78548 1.87318  
N -1.34391 -11.88650 -0.81973  
N -2.95313 -15.40565 0.97373  
N -1.38391 -13.12040 1.83599  
C -0.63023 -11.28925 0.34618  
H -1.32343 -10.57527 0.80940  
H 0.25215 -10.71369 0.01464  
C -2.16260 -12.37201 2.85034  
H -3.01216 -12.97279 3.18989  
H -2.57685 -11.45925 2.40790  
H -1.53105 -12.11807 3.71859  
C -1.01487 -14.47427 2.32153  
H -0.62528 -14.44021 3.35551  
H -0.19863 -14.84526 1.68845  
C -2.21635 -15.42361 2.27781  
H -1.88484 -16.44605 2.52590  
H -2.93241 -15.12991 3.05494  
C -0.20993 -12.32833 1.38256  
H 0.52943 -13.02235 0.96179  
H 0.27618 -11.81819 2.23299  
H -2.17565 -10.83686 -1.46734  
H -2.74645 -11.28176 -2.29042  
H -2.88685 -10.43367 -0.73904  
N -1.46295 -14.70680 -1.41850  
H -0.42499 -12.48268 -1.83888  
H -0.87467 -12.30716 -2.82404  
H 0.54608 -11.95944 -1.84468  
C -2.23008 -14.85963 -2.67844

H -3.18713 -15.35341 -2.47888  
H -2.44899 -13.87766 -3.11102  
H -1.66550 -15.45775 -3.41546  
H -1.24814 -16.02624 -0.76671  
H -0.99720 -16.80476 -1.50905  
H -0.38363 -15.93529 -0.09658  
C -2.48778 -16.45082 0.01688  
H -2.29365 -17.40542 0.53661  
H -3.31388 -16.63516 -0.68256  
C -0.18790 -13.98331 -1.65050  
H 0.45632 -14.16756 -0.78131  
H 0.34481 -14.37905 -2.53491  
H -1.54988 -10.02072 -1.86649  
O -4.35987 -11.47176 0.70957  
O -4.13168 -12.67777 0.29753

45  
I<sup>Cu</sup> No O<sub>2</sub> (1)  
Cu -0.01064 -0.12144 0.00002  
C -2.36022 0.91841 1.60588  
H -3.25854 0.72544 2.21776  
H -2.64936 1.50582 0.72777  
H -1.64929 1.50646 2.19631  
N 1.69109 -0.34338 -1.16287  
N -1.71105 -0.34705 1.16406  
N 1.09304 -1.26216 1.61311  
C 2.65987 -1.10571 -0.31040  
H 2.38424 -0.36220 0.20166  
H 3.33685 -1.70446 -0.94406  
C 1.80363 -0.51164 2.66001  
H 1.10515 0.13505 3.20328  
H 2.56566 0.13793 2.21450  
H 2.29554 -1.18714 3.38438  
C -0.04591 -2.02144 2.15332  
H 0.19578 -2.50270 3.12055  
H -0.28309 -2.83239 1.45364  
H -1.26947 -1.15222 2.37271  
H -2.10417 -1.71940 2.76842  
H -1.02129 -2.37499 3.14430  
C 0.01296 -2.01712 0.74726  
H 2.44914 -2.82799 0.26742  
H 2.82631 -2.49853 3.23234  
C 2.33360 0.92350 -1.61039  
H 1.61962 1.50497 -2.20364  
H 2.61950 1.51657 -0.73501  
N -1.10821 -1.27526 -1.60792  
C 1.25365 -1.11926 -2.36805  
H 1.00215 -0.38391 -3.14306  
H 2.09150 -1.72093 -2.76091  
C -1.82287 -0.53354 -2.65833  
H -2.58801 0.11447 -2.21586  
H -1.12778 0.11387 -3.20504  
H -2.31174 -1.21504 -3.37915  
C -2.02385 -2.03104 -0.73836  
H -2.83443 -2.52008 -1.31194  
H -1.55522 -2.83604 -0.25450  
C -2.67580 -1.11826 0.31505  
H -3.34961 -1.71773 0.95138  
H -3.30403 -0.38031 -0.20032  
C 0.03486 -2.03093 -2.14441  
H 0.27658 -2.83688 -4.44063  
H -0.20408 -2.51835 -3.10925  
H 3.23301 0.73248 -2.22126

45  
I<sup>Cu</sup> No O<sub>2</sub> (3)  
Cu -0.01112 0.05398 -0.00039  
C -2.53318 0.83230 1.51252  
H -3.42608 0.63119 2.13053  
H -2.83167 1.32549 0.58075  
H -1.85582 1.51077 2.04338  
N 1.79188 -0.41824 -1.19153  
N -1.81133 -0.42222 1.19301  
N 1.00146 -1.18833 1.50366  
C 2.65499 -1.31205 -0.35962  
H 3.41355 -0.67949 0.11700  
H 3.20279 -0.20692 -0.99681  
C 1.77649 -0.35291 2.44781  
H 1.10382 0.32878 2.97828  
H 2.49324 0.26914 1.90224  
H 2.31354 -0.98573 1.7741  
C -0.07465 -1.93110 2.21137  
H 0.28366 -2.31754 3.18249  
H -0.34299 -2.80730 1.60738  
C 1.29171 -1.04381 2.44414  
H -2.08572 -1.62225 2.94849  
H -1.02112 -0.22165 3.11889  
H 1.88297 -2.08119 0.71148  
H 2.14811 -2.84891 0.25183  
H 2.60425 -2.61148 1.36142  
C 2.50724 0.83858 -1.51662  
H 1.82635 1.51122 -2.05034

H 2.80331 1.33730 -0.58703  
N -1.01692 -1.20047 -1.49860  
C 1.27543 -1.04794 -2.43986  
H 1.00031 -0.23019 -3.11808  
H 2.07238 -1.62430 -2.94192  
C -1.79671 -0.37396 -2.44668  
H -2.51661 0.24694 -1.90400  
H -1.12790 0.30869 -2.98077  
H -2.33053 -1.01343 -3.17282  
C -1.89344 -2.09435 -0.70211  
H -2.61163 -2.63195 -1.34947  
H -1.25425 -2.85596 -0.23853  
C -2.66981 -1.32422 0.36507  
H -3.21407 -2.03874 1.00565  
H -3.43140 -0.69777 -0.11480  
C 0.06318 -1.94070 -2.20292  
H 0.33628 -2.81266 -1.59500  
H -0.29311 -2.33347 -3.17224  
H 3.40111 0.63931 -2.13384

47  
I<sup>Cu</sup> Side-on (1)  
Cu -0.01103 0.08035 -0.00034  
C -2.71265 0.75581 1.68373  
H -3.58246 0.48727 2.30965  
H -3.06769 1.28744 0.79346  
H -2.06945 1.44279 2.24598  
N 1.90536 -0.42167 -1.27201  
N -1.92483 -0.42580 1.27342  
N 0.94892 -1.13863 1.42331  
C 2.70036 -1.29988 -0.38806  
H 3.45236 -0.67200 0.10663  
H 3.26543 -2.05792 -0.96273  
C 1.69992 -0.27109 2.36910  
H 1.00585 0.38152 2.90767  
H 2.39984 0.36847 1.82310  
H 2.25668 -0.88702 3.09554  
C -0.08903 -1.91707 2.15572  
H 0.32209 -2.29949 3.10647  
H -0.34051 -2.79768 1.55267  
C -1.34465 -1.09169 2.45659  
H -2.07941 -1.75057 2.95851  
H -1.09290 -0.30160 3.17688  
C 1.87673 -2.03395 0.68242  
H 1.27031 -2.82706 0.22963  
C 2.57229 -2.52975 1.38325  
C 2.68686 0.76228 -1.68769  
H 2.04005 1.44299 -2.25344  
H 3.03860 1.30009 -0.79984  
N -0.96447 -1.15016 -1.41830  
C 1.32876 -1.09592 -2.45209  
H 1.07293 -0.31048 -3.17600  
H 2.06688 -1.75326 -2.95107  
C -1.72023 -0.29111 -2.36804  
H -2.42356 0.34714 -1.82491  
H -1.02968 0.36269 -2.90968  
H -2.27365 -0.91360 -3.09142  
C -1.88748 -2.04700 -0.67332  
H -2.58023 -2.54977 -1.37197  
H -1.27684 -2.83452 -0.21670  
C -2.71519 -1.31230 0.39355  
H -3.27630 -2.07053 0.97183  
H -3.47043 -0.69082 -0.10430  
C 0.07745 -1.94218 -2.14740  
H 0.33350 -2.80314 -1.54065  
H -0.33178 -2.31519 -3.09640  
H 3.55834 0.49557 -2.31204  
O -0.37272 1.92587 -0.56152  
O 0.34136 1.92971 0.55290

47  
I<sup>Cu</sup> Side-on TS (3)  
Cu -0.01098 0.07082 -0.00036  
C -2.68824 0.76550 1.66308  
H -3.54634 0.49664 2.30461  
H -3.06319 1.28420 0.77333  
H -2.04370 1.46259 2.21185  
N 1.87898 -0.41235 -1.25262  
N -1.89852 -0.41641 1.25397  
N 0.96989 -1.15590 1.45659  
C 2.68767 -1.29564 -0.37959  
H 3.44025 -0.66671 0.11291  
H 3.25132 -2.04203 -0.96959  
C 1.72942 -0.30990 2.40870  
H 1.04342 0.34365 2.95719  
H 2.43464 0.33079 1.86964  
H 2.28554 -0.93428 3.12957  
C -0.08381 -1.92275 2.17142  
H 0.30049 -2.31271 3.13089  
H -0.33953 -2.79919 1.56364  
C -1.33236 -1.07928 2.45025  
H -2.08326 -1.72055 2.94984

H -1.07762 -0.28441 3.16443  
C 1.88065 -2.04407 0.69333  
H 1.26558 -2.82827 0.23611  
H 2.59043 -2.55395 1.37049  
C 2.66235 0.77193 -1.66710  
H 2.01412 1.46286 -2.21927  
H 3.03422 1.29682 -0.77970  
N -0.98534 -1.16764 -1.45149  
C 1.31641 -1.08358 -2.44583  
H 1.05759 -0.29334 -3.16366  
H 2.07059 -1.72323 -2.94252  
C -1.74954 -0.33021 -2.40745  
H -2.45815 0.30912 -1.87127  
H -1.06713 0.32445 -2.95907  
H -2.30231 -0.96114 -3.12518  
C -1.89130 -2.05716 -0.68416  
H -2.59815 -2.57410 -1.35904  
H -1.27198 -2.83560 -0.22311  
C -2.70253 -1.30806 0.38507  
H -3.26217 -2.05457 0.97869  
H -3.45839 -0.68556 -0.11058  
C 0.07224 -1.93222 -2.16309  
H 0.33253 -2.80468 -1.55161  
H -0.31020 -2.32834 -3.12077  
H 3.52207 0.50477 -2.30716  
O -0.28538 2.03668 -0.59444  
O 0.25343 2.03982 0.58516

47  
I<sup>Cu</sup> End-on (1)  
Cu -2.54491 -13.49846 -0.01049  
C -4.43888 -15.65906 1.18813  
H -4.62218 -16.62270 1.69340  
H -4.96735 -15.65866 0.22821  
H -4.84503 -14.84651 1.79973  
N -1.35434 -11.86109 -0.84641  
N -2.99094 -15.42894 0.95669  
N -1.35775 -13.11234 1.86272  
C -0.62235 -11.30461 0.32892  
H -1.29882 -10.85000 0.80815  
H 0.26332 -10.73692 -0.00777  
C -2.08924 -12.35102 2.89542  
H -2.98283 -12.89992 3.21035  
H -2.43138 -11.39223 2.49070  
H -1.45227 -12.16735 3.77928  
C -1.04145 -14.48766 2.31729  
H -0.65442 -14.89979 3.35428  
H -0.23684 -14.86884 1.68155  
C -2.27336 -15.39578 2.26691  
H -1.97235 -16.41566 2.56367  
H -2.99784 -15.05472 3.01692  
C -0.19508 -12.50771 1.36380  
H 0.52437 -13.05700 0.93032  
H 0.33309 -11.82985 2.18421  
C -2.15584 -10.77836 -1.47103  
H -2.70749 -11.17966 -2.32873  
H -2.88156 -10.40157 -0.74129  
N -1.44256 -14.70663 -1.40243  
C -0.45232 -12.47101 -1.86727  
H -0.92655 -12.32501 -2.84570  
H 0.51140 -11.93487 -1.49066  
C -2.21850 -14.88187 -2.65384  
H -3.17343 -15.37451 -2.44209  
H -2.44218 -13.90851 -3.10287  
H -1.65629 -15.49119 -3.38340  
C -1.21599 -16.01259 -0.73656  
H -0.93966 -16.79194 -1.46906  
H -0.36375 -15.90243 -0.05440  
C -2.46367 -16.46278 0.02608  
H -2.24565 -17.40324 0.56289  
H -3.26397 -16.68828 -0.69082  
C -0.18573 -13.96584 -1.65408  
H 0.47231 -14.12668 -0.79146  
H 0.34473 -14.36206 -2.59319  
H -1.51601 -9.94821 -1.81602  
O -4.40500 -11.45246 0.64521  
O -4.26997 -12.71155 0.43319

47  
I<sup>Cu</sup> End-on (3)  
Cu -2.54345 -13.48399 0.00779  
C -4.43482 -15.66951 1.20764  
H -4.61462 -16.63931 1.70270  
H -4.96907 -15.65695 0.25102  
H -4.84088 -14.86684 1.83261  
N -1.34627 -11.84957 -0.83606  
H -2.98952 -13.43208 0.97115  
N -1.35475 -13.11671 1.85705  
C -0.59860 -13.30520 0.33449  
H -1.25898 -10.57249 0.81668  
H 0.29634 -10.75406 -

H -2.99695 -12.89270 3.18302  
H -2.41619 -11.38674 2.47810  
H -1.46751 -12.17868 3.77700  
C -1.03743 -14.48077 2.32123  
H -0.64873 -14.48273 3.35753  
H -0.23336 -14.87321 1.68647  
C -2.26719 -15.40083 2.27709  
H -1.96045 -16.41977 2.57205  
H -2.98829 -15.06298 3.03196  
C -0.18483 -12.35844 1.36748  
H 0.53103 -13.06787 0.93369  
H 0.34256 -11.84597 2.19354  
C -2.14007 -10.75639 -1.45055  
H -2.70639 -11.14890 -2.30269  
H -2.85389 -10.36860 -0.71502  
N -1.44795 -14.70581 -1.40742  
C -0.46066 -12.46549 -1.86715  
H -0.94818 -12.31952 -2.83911  
H 0.50433 -11.93249 -1.92032  
C -2.22265 -14.88602 -2.65754  
H -3.17656 -15.38035 -2.44468  
H -2.44968 -13.91440 -3.10903  
H -1.66014 -15.49563 -3.38706  
C -1.21982 -16.00761 -0.73672  
H -0.94610 -16.79156 -1.46577  
H -0.36453 -15.89547 -0.05851  
C -2.46334 -16.45942 0.03382  
H -2.23947 -17.40184 0.56536  
H -3.26685 -16.68463 -0.67964  
C -0.19432 -13.96177 -1.65872  
H 0.46676 -14.12411 -0.79846  
H 0.33655 -14.35202 -2.54662  
H -1.49494 -9.93259 -1.80117  
O -4.51010 -11.48209 0.52937  
O -4.31329 -12.72939 0.34266

## 14-TMC ligand (2)

51  
2<sup>Cr</sup> No O<sub>2</sub> (2)  
Cr -0.07412 0.03450 -0.06522  
H 1.73674 -1.38419 -3.81333  
H -0.63168 -1.18704 -3.84417  
H -1.75194 0.95639 -3.64827  
H 1.40337 0.30329 -3.53950  
C 1.32542 -0.68636 -3.06752  
H -0.20795 1.57512 -3.00199  
C -0.13490 -1.08874 -2.86002  
H -1.16502 1.12357 -2.72780  
H -2.90028 -0.80391 -2.62864  
H 1.71848 1.84225 -2.12138  
H -0.16614 -2.07125 -2.36749  
H 3.28662 -0.66644 -2.15942  
H -1.69339 1.83665 -2.08611  
N -0.94178 -0.15967 -2.00835  
H 3.37181 1.65762 -1.47674  
C 2.23338 -0.78284 -1.83933  
C -2.26013 -0.80725 -1.72562  
H -2.05744 -1.85432 -1.46570  
C 2.29272 1.58447 -1.23042  
H 2.12925 -1.78292 -1.39493  
H -3.21573 0.92734 -0.86696  
N 1.95816 0.21549 -0.75778  
H 2.04972 2.30715 -0.44433  
C -2.97171 -0.10377 -0.58340  
H -3.92895 -0.60660 -0.36071  
H 3.80898 -0.47985 0.09944  
C 2.83027 -0.08634 0.42579  
H -2.14615 -2.14583 0.77791  
N -2.10857 -0.04432 0.64185  
H 1.99570 -2.02845 0.86535  
H 3.03073 0.86141 0.94042  
H -2.35698 2.04925 0.83476  
C 2.15712 -1.06630 1.36923  
C -2.31695 -1.29055 1.44744  
H 0.14774 -2.54325 1.70191  
H -3.37618 -1.32295 1.76620  
C -2.51724 1.14607 1.43380  
H -3.58067 1.07744 1.72594  
N 0.81516 -0.55935 1.79700  
H 2.80155 -1.25026 2.25007  
C 0.05974 -1.70105 2.40335  
H 1.51528 1.37355 2.36062  
C -1.42033 -1.43764 2.67882  
H -1.91080 1.23295 2.33897  
H -1.79427 -2.31360 2.33116  
C 0.99039 0.52090 2.80313  
H 0.56223 -1.99402 3.34492  
H 0.01715 0.87911 3.15065  
H -1.55519 -0.59513 3.37102  
H 1.56216 0.14917 3.67265

51  
2<sup>Cr</sup> No O<sub>2</sub> (4)  
Cr -0.07286 -0.01117 -0.06648  
H 1.75008 -1.33178 -3.84794  
H -0.61954 -1.12965 -3.88422  
H -1.77598 0.97042 -3.64626  
H 1.41725 0.34995 -3.53931  
C 1.33596 -0.64959 -3.08913  
H -0.24108 1.61004 -2.99460  
C -0.12510 -1.05729 -2.89646  
C -1.18948 1.13709 -2.72515  
H -2.87848 -0.84529 -2.63476  
H 1.70636 1.85748 -2.08219  
H -0.15537 -2.05073 -2.42656  
H 3.29288 -0.65859 -2.16996  
H -1.72674 1.83162 -2.07087  
N -0.93933 -0.15057 -2.02632  
H 3.37008 1.65515 -1.46617  
C 2.23739 -0.77672 -1.85827  
C -2.23918 -0.83144 -1.73189  
H -2.00462 -1.87077 -1.46701  
C 2.29886 1.58075 -1.20593  
H 2.12153 -1.78403 -1.43311  
H -3.24500 0.87566 -0.87101  
N 1.96498 0.20238 -0.75826  
H 2.05998 2.28729 -0.40291  
C -2.96939 -0.14768 -0.58864  
H -3.91075 -0.67816 -0.36608  
H 3.79538 -0.53890 0.09231  
C 8.2907 -0.12297 0.42493  
H -2.16147 -2.16326 0.82798  
N -2.11383 -0.06767 0.64123  
H 1.94827 -2.04631 0.85693  
H 3.05514 0.81778 0.94112  
H -2.32458 2.03483 0.78608  
C 2.13781 -1.09256 1.36785  
C -2.32881 -1.29209 1.47719  
H 0.13406 -2.54070 1.75999  
H -3.38804 -1.30620 1.79819  
C -2.50695 1.14787 1.40309  
H -3.57340 1.10139 1.68807  
N 0.81060 -0.55997 1.81137  
H 2.78042 -1.29477 2.24517  
C 0.04889 -1.68396 2.44335  
H 1.51635 1.38582 2.33027  
H -4.13165 -1.41272 2.71179  
H -1.90491 1.24347 2.31014  
H -1.80577 -2.27796 3.28112  
C 1.00947 0.53496 2.79710  
H 0.55067 -1.95234 3.39290  
H 0.04350 0.89191 3.16588  
H -1.56876 -0.55737 3.38765  
H 1.60625 0.17686 3.65503

51  
2<sup>Cr</sup> No O<sub>2</sub> (6)  
Cr -0.08483 0.46049 -0.00737  
H 1.75773 -1.41125 -3.71325  
H -0.58777 -1.34432 -3.87079  
H -1.81127 0.77064 -3.88272  
H 1.36023 0.27093 -3.50655  
C 1.29016 -0.70627 -3.00853  
H -0.32098 1.49904 -3.21508  
C -0.17199 -1.14687 -2.86236  
C -1.26908 1.01911 -2.95055  
H -3.02362 -0.85260 -2.55905  
H 1.90972 1.91621 -2.19232  
H -0.20374 -2.10118 -2.31350  
H 3.22180 -0.75640 -2.04915  
H -1.85276 1.75463 -2.38537  
N -1.02659 -0.18470 -2.13226  
H 3.55887 1.54566 -1.60599  
C 2.15745 -0.74572 -1.74475  
C -2.31022 -0.78741 -1.71429  
H -2.10988 -1.81994 -1.39555  
C 2.49637 1.63462 -1.31188  
H 1.96769 -1.69431 -1.22196  
H -3.17311 1.03116 -0.91411  
N 1.99277 0.35903 -0.74065  
H 2.39366 2.43144 -0.56632  
C -2.97605 0.00256 -0.58589  
H -3.95705 -0.45282 -0.35377  
H 3.82894 -0.31783 0.13317  
C 3.82736 0.02160 0.45739  
H -1.99879 -2.01242 0.64106  
N -2.15077 0.08938 0.66138  
H 2.05276 -1.97905 0.80730  
H 2.97604 0.95120 1.02148  
H -2.66228 2.11949 0.98063  
C 2.20750 -1.04405 1.36355  
C -2.24777 -1.22980 1.37181

H 0.17618 -2.56258 1.63571  
H -3.30928 -1.37758 1.64829  
C -2.71537 1.16495 1.51684  
H -3.76867 0.95333 1.77932  
N 0.90184 -0.61904 1.91140  
H 2.93150 -1.27468 1.26974  
C 0.09849 -1.76491 2.39072  
H 1.63127 1.24656 2.60719  
C -1.38319 -1.44010 2.62046  
H -2.13434 1.25992 2.43914  
H -1.81572 -2.30736 3.14259  
C 1.10133 0.36730 2.99092  
H 0.52488 -2.17092 3.32998  
H 0.13757 0.71632 3.37655  
H -1.49709 -0.60568 3.32595  
H 1.68028 -0.06627 3.82870

53  
2<sup>Cr</sup> Side-on (2)  
Cr -0.08241 0.45864 -0.01060  
H 1.73456 -1.52502 -3.67782  
H -0.64268 -1.46165 -3.64128  
H -1.59830 0.66010 -3.78853  
H 1.31791 0.16603 -3.55706  
C 1.30441 -0.77706 -2.99462  
H -0.19229 1.48135 -3.04030  
C -0.12645 -1.21754 -2.69383  
C -1.14086 0.98016 -2.83714  
H -2.90754 -0.82052 -2.51878  
H 1.86028 1.90808 -2.25533  
H -0.11079 -2.13503 -2.08521  
H 3.27471 -0.60237 -2.13102  
H -1.78810 1.71059 -2.34577  
N -0.93096 -0.20361 -1.95349  
H 3.48576 1.66802 -1.54793  
C 2.23154 -0.71451 -1.78471  
C -2.26708 -0.77569 -1.61981  
H -2.11545 -1.81171 -1.28592  
C 2.40431 1.68405 -1.33329  
H 2.17375 -1.67685 -1.25723  
H -3.07836 1.08714 -0.87243  
N 1.96922 0.37089 -0.78226  
H 2.17280 2.46583 -0.60314  
C -2.94498 0.05103 -0.53944  
H -3.94814 -0.35555 -0.32164  
H 3.82152 -0.21918 0.12624  
O 1.88325 2.05156 0.82662  
C 2.80124 0.07742 0.42632  
H -2.24001 -0.02142 0.68609  
N -2.12076 0.09221 0.70950  
H 2.06961 -1.94700 0.71690  
H 2.88808 1.01104 0.99522  
H -2.42242 2.15950 1.03177  
C 2.16982 -1.00935 1.28036  
C -2.32889 -1.20866 1.42725  
H 0.08945 -2.54482 1.39069  
H -3.37190 -1.22463 1.79059  
C -2.61504 1.21653 1.55262  
H -3.69379 1.10075 1.74965  
N 0.80666 -0.59921 1.72612  
H 2.81460 -2.22494 2.15092  
C 0.05960 -1.79936 2.20020  
H 1.57518 1.20662 2.55446  
C -1.39034 -1.52075 2.58884  
H -2.07761 1.23764 2.50480  
H -1.77706 -2.43722 3.05991  
C 0.95804 0.35836 2.86014  
H 0.59200 -2.23429 3.06679  
H -0.01255 0.76164 3.15651  
H 1.45006 -0.75306 3.37154  
H 1.42464 -0.15049 3.72064  
O -0.44684 2.23781 -0.44112

53  
2<sup>Cr</sup> Side-on (4)  
Cr -0.08262 0.46163 -0.01012  
H 1.73681 -1.53195 -3.67739  
H -0.64079 -1.46581 -3.64704  
H -1.60460 0.66241 -3.79181  
H 1.32020 0.15947 -3.56255  
C 1.30538 -0.78190 -2.99737  
H -0.18844 1.47446 -3.05207  
C -0.12669 -1.22115 -2.69886  
C -1.13904 0.97951 -2.84336  
H -2.91102 -0.81770 -2.51734  
H 1.85771 1.90523 -2.26100  
H -0.11311 -2.13865 -2.08998  
H 3.27401 -0.60097 -2.13217  
H -1.77627 1.71454 -2.34575  
N -0.93130 -0.20583 -1.96167  
H 3.47895 1.67778 -1.53906  
C 2.23119 -0.71571 -1.78620

C -2.26682 -0.77355 -1.62117  
H -2.11670 -1.80974 -1.28678  
C 2.39562 1.68673 -1.33422  
H 2.17609 -1.67776 -1.25773  
H -3.06603 1.09358 -0.86996  
N 1.96674 0.37022 -0.78531  
H 2.14789 2.46510 -0.60563  
C -2.93975 0.05599 -0.53909  
H -3.94494 -0.34527 -0.32185  
H 3.81754 -0.21071 0.12784  
O 0.18584 2.10748 0.83653  
C 2.79577 0.08127 0.42663  
H -2.24034 -2.01583 0.68532  
N -2.11853 0.09119 0.71222  
H 2.07011 -1.94566 0.71792  
H 2.87642 1.01633 0.99390  
H -2.39860 2.15938 1.03600  
C 2.16924 -1.00811 1.28189  
C -2.32830 -1.21036 1.42754  
H 0.09182 -2.54918 1.39579  
H -3.37144 -1.22500 1.79004  
C -2.60712 1.21870 1.55497  
H -3.68808 1.11130 1.74412  
N 0.80735 -0.60315 1.73383  
H 2.81810 -1.22260 2.14954  
C 0.05981 -1.80342 2.20507  
H 1.56350 1.21060 2.55413  
C -1.39156 -1.52545 2.59031  
H -2.07569 1.23230 2.51047  
H -1.77940 -2.44299 3.05822  
C 0.95756 0.35650 2.86597  
H 0.58981 -2.23872 3.07264  
H -0.01447 0.75213 3.16773  
H -1.45325 -0.75961 3.37458  
H 1.43401 -0.14797 3.72369  
O -0.44618 2.24249 -0.45036

53  
2<sup>Cr</sup> End-on (2)  
Cr -0.06574 0.35646 -0.02798  
H 1.69566 -1.58975 -3.66617  
H -0.66572 -1.34135 -3.66821  
H -1.70143 0.90874 -3.63295  
H 1.40991 0.12564 -3.52842  
C 1.31526 -0.81969 -2.97789  
H -0.09385 1.45645 -3.08287  
C -0.14817 -1.15984 -2.70862  
C -1.07437 1.10796 2.74836  
H -2.91056 -0.65970 -2.55949  
H 1.87139 1.79782 -2.25375  
H -0.19832 -2.10034 -2.13648  
H 3.28436 -0.88076 -2.08402  
H -1.51242 1.90795 -2.13497  
N -0.91977 -0.13527 -1.93843  
H 3.52121 1.51031 -1.62842  
C 2.22950 -0.83751 -1.75433  
C -2.27983 -0.69483 -1.65454  
H -2.15765 -1.75515 -1.39207  
C 2.45257 1.55950 -1.35924  
H 2.09206 -1.79322 -1.22611  
H -3.04628 1.12828 -0.78847  
N 2.00774 0.26773 -0.76791  
H 2.28733 2.36197 -0.63391  
C -2.93747 0.06834 -0.52412  
H -3.94680 -0.33304 -0.32419  
H 3.86436 -0.33058 0.14605  
O -0.18955 2.07455 0.00210  
C 2.85535 0.01080 0.43857  
H -2.07202 -2.09140 0.62074  
N -2.09596 0.01986 0.71381  
H 2.12261 -1.98280 0.85241  
H 2.98219 0.96806 0.96015  
H -2.41871 2.06476 1.14574  
C 2.20470 -1.00806 1.35257  
C -2.26814 -1.31120 1.37110  
H 0.21076 -2.57399 1.53897  
H -3.32648 -1.41455 1.67177  
C -2.60173 1.09152 1.62041  
H -3.68084 0.95370 1.80330  
N 0.82692 -0.57442 1.73575  
H 2.82315 -1.16334 2.25388  
C 0.10267 -1.76877 2.28208  
H 1.45870 1.34850 2.39394  
C -1.37726 -1.56393 2.58619  
H -2.08220 1.06283 2.58305  
H -1.73109 -2.49650 3.05140  
C 0.92394 0.47825 2.78615  
H 0.62529 -2.10310 3.19729  
H -0.07266 0.81125 3.08457  
H -1.52288 -0.79214 3.35342  
H 1.45725 0.08608 3.66937  
O -1.15589 2.96145 -0.26181

53  
2<sup>Cr</sup> End-on (4)  
Cr -0.09641 0.48062 -0.00617  
H 1.72862 -1.56750 -3.65310  
H -0.64090 -1.35700 -3.73296  
H -1.72961 0.84913 -3.68438  
H 1.39606 0.13836 -3.52866  
C 1.30896 -0.80720 -2.97688  
H -0.14158 1.43655 -3.11299  
C -0.15601 -1.18507 -2.75353  
C -1.11623 1.05895 -2.79156  
H -2.94528 -0.71612 -2.52270  
H -1.97300 1.82816 -2.28280  
H -0.20333 -2.13469 -2.19795  
H 3.25662 -0.82343 -2.04616  
H -2.56219 1.84956 -2.18822  
N -0.94060 -0.18129 -1.98477  
H 3.60258 1.50504 -1.61864  
C 2.19691 -0.80668 -1.73120  
C -2.28172 -0.72736 -1.63935  
H -2.15374 -1.78068 -1.35337  
C 2.53082 1.59130 -1.37191  
H 2.01510 -1.73963 -1.17837  
H -3.03310 1.12644 -0.80337  
N 2.02756 0.33069 -0.76852  
H 2.37425 2.41593 -0.66898  
C -2.93003 0.07165 -0.51555  
H -3.94224 -0.31986 -0.31216  
H 3.85841 -2.29032 0.15820  
O -0.10565 2.27789 -0.12394  
C 2.84665 0.03798 0.44763  
H -2.05547 -2.05415 0.62329  
H -2.11503 0.05283 0.74209  
N 2.13289 -1.98198 0.81806  
H 2.96246 0.98148 0.99612  
H -2.43706 2.09339 1.16325  
C 2.20769 -1.01994 1.34231  
C -2.25788 -1.29133 1.38845  
H 0.20248 -2.61279 1.54074  
H -3.31542 -1.40968 1.68478  
C -2.64255 1.12112 1.63577  
H -3.72748 0.99390 1.78703  
N 0.83826 -0.62845 1.77047  
H 2.85812 -1.18731 2.22038  
H 0.11122 -1.81664 2.29547  
H 1.49201 1.27880 2.45954  
C -1.36708 -1.57325 2.59837  
H -2.14966 1.08011 2.61269  
H -1.74883 -2.49866 0.05573  
C 0.94221 2.04892 2.83236  
H 0.61474 -2.40780 3.21220  
H -0.05191 0.75516 3.12853  
H -1.49241 -0.80550 3.37363  
H 1.46091 0.00468 3.71992  
O -1.20973 3.01792 -0.30777

53  
2<sup>Cr</sup> End-on (6)  
Cr -0.13006 0.52629 -0.17711  
H 1.72488 -1.54430 -3.70371  
H -0.64064 -1.41820 -3.74141  
H -1.67381 0.70922 -3.85225  
H 1.36407 0.15604 -3.57222  
C 1.30179 -0.79220 -3.02057  
H -0.23792 1.49037 -3.12567  
C -0.15087 -1.19904 -2.77484  
C -1.19196 1.00340 -2.90389  
H -2.94257 -0.84652 -2.58809  
H 1.89296 1.85978 -2.31013  
H -0.17097 -2.12651 -2.18292  
H 3.25857 -0.73324 -2.10611  
H -1.81971 1.73537 -2.38727  
N -0.97357 -0.19151 -2.03904  
H 3.52317 1.55379 -1.64772  
C 2.20161 -0.77612 -1.78365  
C -2.29782 -0.79451 -1.69317  
H -2.11555 1.82827 -1.37112  
C 2.45009 1.61919 -1.39835  
H 2.06903 -1.72360 -1.24300  
H -3.19709 1.02114 -0.92828  
N 1.96902 0.33766 -0.81181  
H 2.29266 2.42884 -0.67855  
C -2.99930 -0.00608 -0.59559  
H -3.98014 -0.46676 -0.37733  
H 3.80390 -0.21069 0.13550  
O 0.25196 2.18939 0.91992  
C 2.77640 0.07347 0.24294  
H -2.04039 -2.02905 0.64409  
N -2.17082 0.07750 0.64399  
H 2.02248 -1.93082 0.77440  
H 2.84771 1.02375 0.96864

H -2.68089 2.10994 0.95696  
C 2.18134 -0.99824 1.33375  
C -2.27096 -1.23318 1.36640  
H 0.14936 -2.50424 1.53843  
H -3.32967 -1.36564 1.66033  
C -2.71491 1.16143 1.50297  
H -3.75461 0.94142 1.80051  
N 0.88708 -0.58019 1.90865  
H 2.92026 -1.23349 2.12498  
C 0.08679 -1.74697 2.33564  
H 1.70442 1.19876 2.73154  
C -1.38925 -1.43571 2.60181  
H -2.10137 1.27212 2.40171  
H -1.80900 -2.30570 3.12968  
C 1.11397 0.33248 3.04626  
H 0.52827 -2.20346 3.24461  
H 1.16323 0.71863 3.42768  
H -1.49501 -0.60128 3.30842  
H 1.64332 -0.18308 3.87049  
O -0.48308 2.76018 -0.03746

51

<sup>2</sup>Mn No O<sub>2</sub> (1)

Mn -0.07200 -0.00764 -0.06571  
H 1.74476 -1.36859 -3.81093  
H -0.63465 -1.17104 -3.83864  
H -1.73870 0.96219 -3.59829  
H 1.39833 0.31573 -3.53093  
C 1.32542 -0.67667 -3.06400  
H -0.19780 1.57651 -2.94290  
C -1.02967 -1.08836 -2.85671  
C -1.15219 1.11673 -2.67481  
H -2.87706 -0.82547 -2.63280  
H 1.65747 1.84827 -2.07499  
H -0.15515 -2.08179 -2.38568  
H 3.27766 -0.64049 -2.13970  
H -1.68394 1.81823 -2.02400  
N -0.92732 -0.17853 -1.97800  
H 3.32147 1.66708 -1.45697  
C 2.22265 -0.77319 -1.83108  
C -2.25028 -0.82977 -1.72115  
H -2.05269 -1.87795 -1.45993  
C 2.25084 1.58318 -1.19638  
H 2.13089 -1.78076 -1.40024  
H -3.21921 0.90250 -0.87640  
N 1.92740 0.20672 -0.73704  
H 2.01367 2.29634 -0.39885  
C -2.96350 -0.12408 -0.58667  
H -3.91352 -0.63165 -0.34796  
H 3.79752 -0.49121 0.08502  
C 2.82359 -0.10335 0.42914  
H -2.16705 -2.15116 0.79472  
N -2.07562 -0.05455 0.62375  
H 1.99736 -2.05350 0.84872  
H 3.02806 0.83764 0.95429  
H -2.28054 2.04857 0.79092  
C 2.15030 -1.09209 1.35760  
C -2.31235 -1.28126 1.45127  
H 0.13811 -2.56714 1.71834  
H -3.37186 -1.28248 1.77270  
C -2.46265 -1.15501 1.39813  
H -3.53059 1.11550 1.67930  
N 0.80059 -0.58053 1.75653  
H 2.77904 -1.27911 2.24815  
C 0.05627 -1.70737 2.39905  
H 1.47510 1.37813 2.27394  
C -1.41824 -1.43270 2.68098  
H -1.86580 1.23803 2.30949  
H -1.79972 -2.30166 3.23928  
C 0.97215 0.52410 2.73828  
H 0.56809 -1.97981 3.34246  
H -0.00088 0.86973 3.09642  
H -1.54254 -0.58436 3.36813  
H 1.56578 0.18153 3.60493

51

<sup>2</sup>Mn No O<sub>2</sub> (3)

Mn -0.07203 -0.01695 -0.06673  
H 1.74462 -1.35891 -3.81873  
H -0.63475 -1.15177 -3.84736  
H -1.74605 0.97721 -3.58668  
H 1.40370 0.32483 -3.52914  
C 1.32684 -0.67002 -3.06808  
H -0.20082 1.58625 -2.93648  
C -1.02948 -1.07852 -2.86484  
C -1.15413 1.12557 -2.66591  
H -2.87330 -0.82571 -2.64015  
H 1.65045 1.84287 -2.06686  
H -0.15747 -2.07533 -2.40120  
H 3.27758 -0.64565 -2.13951  
H -1.68145 1.82322 -2.00717  
N -0.92664 -0.17435 -1.97922

H 3.31487 1.66411 -1.44897  
C 2.22159 -0.77761 -1.83430  
C -2.24852 -0.83214 -1.72715  
H -2.05495 -1.88031 -1.46974  
C 2.24441 1.57627 -1.18931  
H 2.12518 -1.78727 -1.40926  
H -3.22960 0.88997 -0.87549  
N 1.92610 0.19668 -0.73570  
H 2.00407 2.28544 -0.38908  
C -2.96553 -0.13571 -0.59000  
H 3.91095 -0.65120 -0.35086  
H 3.79550 -0.50975 0.08284  
C 2.82543 -0.11472 0.42918  
H -2.16019 -2.16007 0.80228  
N -2.07450 -0.06435 0.61945  
H 1.98965 -2.05815 0.85615  
H 3.03787 0.82673 0.95047  
H -2.27126 2.04036 0.77795  
C 2.14819 -1.09594 1.36195  
C -2.31117 -1.28670 1.45304  
H 0.13907 -2.56314 1.73504  
H -3.37176 -1.28852 1.77066  
C -2.45638 1.14991 1.38904  
H -3.52412 1.11433 1.67116  
N 0.79996 -0.57623 1.75924  
H 2.77540 -1.28232 2.25370  
C 0.05533 -1.69881 2.40966  
H 1.47044 1.38846 2.26000  
C -1.42030 -1.42593 2.68660  
H -1.85810 1.23486 2.29908  
H -1.80030 -2.29198 3.25048  
C 0.97568 0.53436 2.73328  
H 0.56676 -1.96314 3.35557  
H 0.00457 0.87741 3.09920  
H -1.54946 -0.57289 3.36697  
H 1.57893 0.19879 3.59572

51

<sup>2</sup>Mn No O<sub>2</sub> (5)

Mn -0.07737 0.16564 -0.04149  
H 1.73978 -1.36975 -3.79024  
H -0.60822 -1.23927 -3.86275  
H -1.78189 0.90399 -3.74101  
H 1.38746 0.31248 -3.52097  
C 1.31492 -0.67696 -3.04718  
H -0.26917 1.56741 -3.05891  
C -0.14816 -1.09875 -2.86445  
C -1.22239 1.09233 -2.80639  
H -2.94933 -0.85237 -2.59575  
H 1.87810 1.89440 -2.14882  
H -0.17526 -2.07176 -2.35135  
H 3.28172 -0.73818 -2.15321  
H -1.78522 1.80415 -2.19206  
N -0.98711 -0.16601 -2.06284  
H 3.54443 1.58305 -1.58518  
C 2.22651 -0.76860 -1.81649  
C -2.28081 -0.81113 -1.71441  
H -2.06295 -1.84855 -1.42630  
C 2.48105 1.60266 -1.28251  
H 2.06907 -1.74498 -1.33558  
H -3.24863 0.94038 -0.88849  
N 2.04542 0.28311 -0.76869  
H 2.33958 2.36160 -0.50447  
C -3.00538 -0.08437 -0.58050  
H 3.96769 -0.59085 -0.38163  
H 3.84656 -0.46788 0.12433  
C 2.86353 -0.06503 0.43046  
H -2.08785 -2.09287 0.73214  
N -2.19847 0.00803 0.67128  
H 1.99483 -2.01334 0.81936  
H 3.06513 0.86732 0.97315  
H -2.61146 2.06913 0.91224  
C 2.17696 -1.07156 1.35461  
C -2.31160 -1.27454 1.43185  
H 0.15685 -2.54704 1.69538  
H -3.36693 -1.39366 1.74728  
C -2.70242 1.13919 1.48523  
H -3.76026 0.98886 1.77067  
N 0.86185 -0.58342 1.84800  
H 2.85417 -1.30084 2.19974  
C 0.07462 -1.71513 2.41037  
H 1.58257 1.33118 2.43507  
C -1.40925 -1.42401 2.66376  
H -2.10781 1.24825 2.39752  
H -1.79817 -2.29063 3.22063  
C 1.05227 0.47461 2.86606  
H 0.54068 -2.40799 3.35901  
H 0.08288 0.83883 3.22203  
H -1.53554 -0.57670 3.35198  
H 1.62639 0.09305 3.73028

51

<sup>2</sup>Mn No O<sub>2</sub> (7)

Mn -0.08994 0.81824 0.03601  
H 1.69111 -1.47712 -3.73628  
H -0.63875 -1.40846 -3.63568  
H -1.65521 0.72025 -3.79894  
H 1.35435 0.22125 -3.52979  
C 1.31647 -0.74394 -3.00599  
H -0.25684 1.55639 -3.04849  
C -0.12463 -1.14749 -2.69063  
C -1.19615 1.03268 -2.84308  
H -2.89272 -0.86717 -2.51071  
H 2.12355 1.84210 -2.34269  
H -0.11324 -2.06091 -2.07559  
H 3.32641 -0.75832 -2.20359  
H -1.85658 1.74861 -2.34188  
N -0.95390 -0.14004 -1.96721  
H 3.72427 1.52562 -1.61564  
C 2.28665 -0.77008 -1.82303  
C -2.25474 -0.77260 -1.61262  
H -2.04180 -1.79581 -1.27266  
C 2.64124 1.59874 1.40837  
H 2.15841 -1.72440 -1.29240  
H -3.17798 1.02972 -0.85204  
N 2.12259 0.33274 -0.84023  
H 2.55572 1.24829 -0.70246  
C -3.01174 -0.00895 -0.53458  
H -0.41228 -0.46129 -0.40001  
H 3.89032 -0.33008 0.17304  
C 2.87029 0.02911 0.40658  
H -2.23364 -2.07007 0.71091  
N -2.27621 0.03395 0.75475  
H 2.00975 -1.93097 0.71992  
H 2.98916 0.97323 0.95601  
H -2.69616 2.07772 1.10239  
C 2.16329 -0.99872 1.28031  
C -2.38600 -1.27328 1.45316  
H 0.08046 -2.46198 1.38097  
H -3.42015 -1.91218 1.83064  
C -2.84947 1.10955 1.59626  
H -3.92894 0.94719 1.76849  
N 0.82946 -0.53874 1.75889  
H 2.81144 -1.25294 2.13904  
C 0.05295 -1.73200 2.20471  
H 1.62540 1.25291 2.57828  
C -1.40312 -1.48797 2.60487  
H -2.34332 1.14633 2.56703  
H -1.73490 -2.39330 3.13541  
C 1.01055 0.40226 2.89173  
H 0.58288 -2.19687 3.05827  
H 0.04492 0.80744 3.21248  
H -1.47939 -0.68240 3.34767  
H 1.49427 -0.10364 3.74754

53

<sup>2</sup>Mn Side-on (1)

Mn -0.08315 0.48875 -0.01360  
H 1.69574 -1.67192 -3.59640  
H -0.68369 -1.49411 -3.56557  
H -1.44759 0.67730 -3.80208  
H 1.33882 0.03629 -3.58270  
C 1.29384 -0.86813 -2.96109  
H -0.09653 1.50607 -2.96252  
C -0.14792 -1.23795 -2.63251  
C -1.05652 1.00584 -2.82460  
H -2.91094 -0.66517 -2.52809  
H 1.86174 1.78895 -2.38609  
H -0.16351 -2.13413 -1.99267  
H 3.26266 -0.67371 -2.09436  
H -1.73805 1.73906 -2.38613  
N -0.91257 -0.17154 -1.91974  
H 3.44989 1.64906 -1.58787  
C 2.21637 -0.76661 -1.75150  
C -2.28201 -0.68957 -1.62143  
H -2.18921 -1.74524 -1.33150  
C 2.35994 1.64716 -1.42239  
H 2.14825 -1.70801 -1.18883  
H -3.00533 1.17836 -0.80725  
N 1.94209 0.35815 -0.80174  
H 2.07167 2.46249 -0.75100  
C -2.92177 0.12460 -0.51446  
H -3.94225 -0.24291 -0.30712  
H 3.81178 -0.10712 0.13982  
O 0.36903 2.16060 0.71924  
C 2.77590 0.15365 0.41971  
H -2.21117 -2.02723 0.61148  
N -2.09064 0.07880 0.72584  
H -2.14864 -1.98909 0.78086  
H 2.81141 1.11316 0.94989  
H -2.33290 2.12717 1.18109  
C 2.18097 -0.92520 1.30248  
C -2.30890 -1.25003 1.38163  
H 0.13569 -2.52319 1.29910

H -3.35441 -1.28363 1.73629  
C -2.57249 1.15975 1.63212  
H -3.66034 1.06542 1.78542  
N 0.78494 -0.56415 1.69766  
H 2.80591 -1.07134 2.20007  
C 0.08100 -1.80663 2.13335  
H 1.51480 1.22254 2.60165  
C -1.37395 -1.59643 2.53452  
H -2.07861 1.09363 2.60597  
H -1.73374 -2.54628 2.95796  
C 0.86965 0.37741 2.85204  
H 0.63512 -2.25047 2.98128  
H -0.11277 0.78862 3.08931  
H -1.45694 -0.86838 3.35240  
H 1.27355 -0.15061 3.73219  
O -0.60549 2.21937 -0.31912

53

<sup>2</sup>Mn Side-on (3)

Mn -0.08276 0.46602 -0.00965  
H 1.70616 -1.64082 -3.60981  
H -0.67636 -1.49470 -3.57484  
H -1.47038 0.66998 -3.79442  
H 1.32778 0.06346 -3.57302  
C 1.29419 -0.85016 -2.96460  
H -0.11206 1.49743 -2.96456  
C -0.14330 -1.24006 -2.64002  
C -1.07003 0.99606 -2.81976  
H -2.91040 -0.69971 -2.53044  
H 1.83221 1.82100 -2.34475  
H -0.14968 -2.14166 -2.00735  
H 3.26042 -0.64365 -2.09728  
H -1.74730 1.72739 -2.37199  
N -0.91697 -0.18520 -1.92114  
H 3.43121 1.66685 -1.56802  
C 2.21584 -0.75211 -1.75444  
C -2.28265 -0.71174 -1.62267  
H -2.18262 -1.76443 -1.32320  
C 2.34304 1.66064 -1.39095  
H 2.15974 -1.70074 -1.20231  
H -3.01535 1.16008 -0.82677  
N 1.93541 0.35917 -0.78890  
H 2.05979 2.46203 -0.70121  
C -2.92594 0.11003 -0.52344  
H -3.94304 -0.26058 -0.30683  
H 3.81187 -0.12464 0.13199  
O 0.31357 2.13056 0.76126  
C 2.78028 0.13843 0.42416  
H -2.22771 -2.02438 0.62778  
N -2.08716 0.08154 0.71429  
H 2.14303 -1.90653 0.76958  
H 2.82563 1.09213 0.96386  
H -2.31074 2.13858 1.13214  
C 2.18408 -0.94540 1.29964  
C -2.31222 -1.23731 1.38964  
H 0.12379 -2.53085 1.30832  
H 1.26974 -1.67192 -3.59640  
H -3.35593 -1.25577 1.75021  
C -2.55687 1.18230 1.60355  
H -3.64461 1.09747 1.76305  
N 0.79175 -0.57555 1.69782  
H 2.81009 -1.0261 2.19465  
C 0.07682 -1.80932 2.13905  
H 1.52575 1.21631 2.58717  
H 1.37546 -1.58139 2.54183  
H -2.05732 1.13113 2.57514  
H -1.74336 -2.52379 2.97489  
C 0.88519 0.37070 2.84805  
H 0.62772 -2.25476 2.98797  
H -0.09572 0.78029 3.09334  
H -1.44907 -0.84517 3.35311  
H 1.29928 -0.15345 3.72579  
O -0.55318 2.22846 -0.37491

53

<sup>2</sup>Mn Side-on (5)

Mn -0.08535 0.62664 0.01473  
H 1.69902 -1.46702 -3.74167  
H -0.62613 -1.48289 -3.54277  
H -1.60340 0.63544 -3.77742  
H 1.31344 0.22254 -3.54360  
C 1.32820 -0.73605 -3.00711  
H -0.24860 1.53291 -3.01682  
C -0.08566 -1.17816 -2.62744  
H -1.17679 0.98978 -2.82347  
H -2.84489 -0.91627 -2.49339  
H 2.02823 1.90546 -2.27621  
H -0.02868 -2.06701 -1.97983  
H 3.35948 -0.59996 -2.27330  
H -1.86872 1.69511 -2.35498  
N -0.92626 -0.16443 -1.91501  
H 3.64614 1.64986 -1.56333  
C 2.33850 -0.71325 -1.86128

C -2.23505 -0.80331 -1.57976  
H -2.02253 -1.81728 -1.21226  
C 2.56215 1.65822 -1.35256  
H 2.31128 -1.69097 -1.35864  
H -3.17511 1.01374 -0.86979  
N 2.11297 0.34187 -0.83770  
H 2.33258 2.43381 -0.61376  
C -3.00811 -0.01680 -0.53097  
H -4.00641 -0.47138 -0.39111  
H 3.88425 -0.34924 0.15839  
O 0.17811 2.25671 0.84994  
C 2.86755 0.01320 0.39823  
H -2.35805 -2.05703 0.76838  
H 2.26682 0.04700 0.75376  
H 1.97631 -1.94418 0.64656  
H 2.98874 0.94213 0.97020  
H -2.57901 2.11909 1.04163  
C 2.14064 -1.03052 1.23476  
C -2.43270 -1.23262 1.49263  
H 0.00557 -2.45977 1.31125  
H -3.45637 -1.27439 1.91097  
C -2.78362 1.17756 1.56287  
H -3.86920 1.07359 1.73759  
N 0.80339 -0.55273 1.70246  
H 2.76181 -1.31801 2.10133  
C 0.01571 -1.74500 2.14896  
H 1.65693 1.95322 2.56646  
C -1.41783 -1.47538 2.60786  
H -2.27665 1.20970 2.53278  
H -1.74897 -2.37491 3.14848  
C 1.00188 0.36934 2.85644  
O 0.57036 -2.23013 2.97360  
H 0.04926 0.80690 3.16619  
H -1.44818 -0.66951 3.35314  
H 1.14958 -0.17633 3.70445  
O -0.43661 2.39027 -0.41883

53

<sup>2</sup>Mn Side-on (7)

Mn -0.08675 0.54616 0.00545  
H 1.71820 -1.46236 -3.74166  
H -0.62161 -1.38556 -3.72069  
H -1.68242 0.71830 -3.85000  
H 1.36956 0.23186 -3.53248  
C 1.31662 -0.73726 -3.01740  
H -0.28541 1.55356 -3.10363  
C -0.13425 -1.14778 -2.75575  
C -1.22148 1.02693 -2.89462  
H -2.92566 -0.86506 -2.54381  
H 1.98412 1.86846 -2.26282  
H -0.14033 -2.07521 -2.16154  
H 3.30262 -0.74785 -2.16121  
H -0.88115 1.73769 -2.38835  
N -1.97102 -0.15095 -2.02750  
H 3.62214 1.54019 -1.63132  
C 2.25388 -0.77348 -1.80760  
C -2.99806 -0.02214 -0.55776  
H -3.98868 -0.48304 -0.38934  
H 3.86434 -0.35639 0.15397  
O 0.26591 2.51721 0.77648  
C 2.85460 0.00536 0.42223  
H -2.16971 -2.07719 0.70207  
H -2.22432 0.02893 0.71503  
H 2.00778 -1.95939 0.75828  
H 2.99211 0.94658 0.97013  
H -2.66340 2.07709 1.03341  
C 2.17149 -1.02587 1.31432  
C -2.34828 -1.27301 1.43092  
H 0.10923 -2.49771 1.47748  
H -3.39422 -1.38434 1.77548  
C -2.76947 1.12217 1.55931  
H -3.83423 0.94695 1.79348  
N 0.84807 -0.56260 1.81706  
H 2.84104 -1.27555 2.15772  
C 0.06213 -2.74345 2.27824  
H 1.64847 1.23974 2.

53

H 3.40249 1.49687 -1.67202  
C 2.18389 -0.89362 -1.71277  
C -2.29583 -0.59987 -1.68856  
H -2.22436 -1.67613 -1.48070  
C 2.32398 1.52096 -1.44461  
H 2.03126 -1.83034 -1.15514  
H -2.97610 1.20406 -0.72784  
N 1.91820 0.24739 -0.78469  
H 2.09722 2.35569 -0.77661  
C -2.90462 0.12987 -0.51732  
H -3.92116 -0.24533 -0.30727  
H 3.81064 -0.15669 0.15044  
O 0.03193 1.92916 0.20140  
C 2.77968 0.12018 0.43185  
H -2.03705 -2.12462 0.55373  
N -2.03448 -0.01105 0.69415  
H 1.17048 -1.88545 0.93630  
H 2.86262 1.11236 0.89806  
H -2.27251 2.02225 1.21035  
C 2.20091 -0.88766 1.39470  
C -2.24094 -1.35634 1.31535  
H 0.27624 -2.52075 1.48501  
H -3.30477 -1.45416 1.59591  
C -2.49328 1.04200 1.64982  
H -3.57583 0.93187 1.82648  
N 0.80103 -0.50572 1.76321  
H 2.83080 -0.97039 2.29704  
C 0.12146 -1.74863 2.25548  
H 1.35730 1.41525 2.46996  
C -1.37053 -1.62950 2.54027  
H -1.97761 0.95447 2.60839  
H -1.69079 -2.59847 2.95205  
O 0.85654 0.51654 2.84146  
H 0.64541 -2.09699 3.16400  
H -0.15124 0.80982 3.14242  
H -1.56648 -0.90136 3.33804  
H 1.39586 0.12068 3.71860  
O -0.95304 2.74089 -0.17979

51  
2<sup>Co</sup> No O<sub>2</sub> (1)  
Co -0.05088 -0.09851 -0.05905  
H 1.76445 -1.41581 -3.80043  
H -0.62649 -1.18170 -3.79239  
H -1.68139 0.96147 -3.56520  
H 1.43088 0.27821 -3.55495  
C 1.35477 -0.70408 -3.06749  
H -0.12992 1.56889 -2.93711  
C -0.09570 -1.09773 -2.82521  
C -1.08402 1.12139 -2.64994  
H -2.81473 -0.78628 -2.60405  
H 1.55580 1.81469 -2.04197  
H -0.12200 -2.08506 -2.34227  
H 3.29269 -0.58786 -2.12287  
H -1.60047 1.83432 -2.00060  
N -0.86378 -0.16858 -1.93718  
H 3.20803 1.70842 -1.38381  
C -2.24271 -0.77993 -1.83157  
C -2.19311 -0.80521 -1.68952  
H -2.01347 -1.85626 -1.42857  
C -2.13753 1.56354 -1.15301  
H 2.19476 -1.79686 -1.41644  
H -3.09849 0.95084 -0.83596  
N 1.87599 0.16169 -0.72614  
H 1.84174 2.24503 -0.34774  
C -2.88211 -0.08701 -0.55625  
H -3.84810 -0.55924 -0.31301  
H 3.76261 -0.49327 0.08244  
C 2.78548 -0.12285 0.43339  
H -2.22774 -2.14842 0.82647  
N -1.98100 -0.06967 0.64354  
H 1.96991 -2.07489 0.83797  
H 2.97656 0.82051 0.95864  
H -1.98940 2.04268 0.81280  
C 2.12096 -1.11673 1.35256  
C -2.31040 -1.26805 1.47939  
H 0.11161 -2.58530 1.68864  
H -3.36562 -1.19192 1.80407  
C -2.29223 1.17237 1.40517  
H -3.37253 1.23428 1.62553  
N 0.77328 -0.59836 1.74159  
H 2.74068 -1.30593 2.24838  
C 0.04275 -1.73665 2.38412  
H 1.46361 1.34700 2.28009  
C -1.42166 -1.46671 2.70134  
H -1.74819 1.19582 2.35163  
H -1.80480 -2.34880 2.32650  
C 0.95764 0.49266 2.73907  
H 0.57763 -2.01867 3.31096  
H -0.00988 0.84115 3.10628  
H -1.53118 -0.63588 3.41206  
H 1.55137 0.13554 3.59953

51  
2<sup>Co</sup> No O<sub>2</sub> (3)  
Co -0.05276 0.14038 -0.03107  
H 1.75160 -1.45775 -3.73636  
H -0.62188 -1.26933 -3.79326  
C 0.04840 -1.77282 2.17663  
H 1.53155 1.26739 2.47961  
C -1.39915 -1.54568 2.60401  
H -2.18404 1.11855 2.59948  
H -1.73055 -2.47318 3.09488  
C 0.94350 0.40763 2.81695  
H 0.60366 -2.22185 3.02176  
H -0.03555 0.79185 3.11689  
H -1.46724 -0.77357 3.38208  
H 1.43629 -0.06148 3.68799

51  
2<sup>Co</sup> No O<sub>2</sub> (5)  
Co -0.06092 0.65732 0.03331  
H 1.69593 -1.56332 -3.70113  
H -0.64628 -1.42422 -3.57447  
H -1.55916 0.78805 -3.69986  
H 1.37420 0.14489 -3.55106  
C 1.33483 -0.80111 -2.99421  
H -0.11045 1.52736 -2.94508  
C -0.10225 -1.17760 -2.64291  
C -1.07562 1.05484 -2.74276  
H -2.84567 -0.78551 -2.49858  
H 2.01785 1.81309 -2.31739  
H -0.09709 -2.08962 -2.02604  
H 3.34534 -0.72423 -2.19945  
H -1.68785 1.79326 -2.21467  
N -0.89133 -0.15224 -1.89868  
H 3.62142 1.58698 -1.56408  
C 2.30849 -0.79266 -1.81821  
C -2.22342 -0.74058 -1.58644  
H -2.05946 -1.77889 -1.26586  
C 2.53275 1.59310 -1.37646  
H 2.22748 -1.75546 -1.29400  
C -0.37829 1.08399 -0.80308  
N 2.08779 0.29137 -0.82663  
H 2.27881 2.38915 -0.66476  
C -2.95091 0.03517 -0.50359  
H -3.96520 -0.38172 -0.36231  
C 3.87637 -0.32842 0.17623  
C 2.85195 0.01264 0.41405  
H -2.28439 -0.07577 0.71977  
N -2.19439 0.02512 0.77253  
H 2.02841 -1.96177 0.72509  
H 2.95170 0.95970 0.96081  
H -2.43318 2.09194 1.14052  
C 2.15360 -1.02132 1.27843  
C -2.38027 -1.27468 1.46633

H 0.07265 -2.50458 1.35467  
H -3.41547 -1.32916 1.85375  
C -2.67900 1.13712 1.62298  
H -3.76981 1.06250 1.78166  
N 0.79993 -0.57073 1.70938  
H 2.77621 -1.25256 2.16136  
C 0.04840 -1.77282 2.17663  
H 1.53155 1.26739 2.47961  
C -1.39915 -1.54568 2.60401  
H -2.18404 1.11855 2.59948  
H -1.73055 -2.47318 3.09488  
C 0.94350 0.40763 2.81695  
H 0.60366 -2.22185 3.02176  
H -0.03555 0.79185 3.11689  
H -1.46724 -0.77357 3.38208  
H 1.43629 -0.06148 3.68799

53  
2<sup>Co</sup> Side-on (1)  
Co -0.07427 0.39323 -0.00084  
H 1.73887 -1.68937 -3.55996  
H -0.67501 -1.56538 -3.54203  
H -1.42535 0.61531 -3.75330  
H 1.29556 -0.00087 -3.60340  
C 0.94350 0.40763 2.81695  
H -0.05468 1.42024 -2.92836  
C -0.13190 -1.31007 -2.61274  
C -0.101823 0.93386 -2.77902  
H -2.88940 -0.71275 -2.49091  
H 1.77358 1.87602 -2.30149  
H -0.11975 -2.20936 -1.97850  
H 3.22998 -0.53353 -2.08929  
H -1.68191 0.75250 -2.32947  
N -0.88564 -0.25628 -1.88445  
H 3.35930 1.72866 -1.49544  
C 2.19582 -0.70808 -1.74505  
C -2.26074 -0.73456 -1.58333  
H -2.19615 -1.78415 -1.26748  
C 2.26820 1.70786 -1.34063  
H 2.20261 -1.65333 -1.18792  
H -2.81864 1.18421 -0.83346  
N 1.87078 0.39020 -0.76884  
H 1.96272 2.49326 -0.64345  
C -2.86438 0.14043 -0.50420  
H -3.88885 -0.18760 -0.25976  
H 3.76266 -0.07857 0.11549  
O 0.20631 2.06350 0.82698  
C 2.73002 0.14550 0.43250  
H -2.20149 -1.98256 0.63009  
N -2.23154 0.11506 0.72853  
H 2.14412 -1.93180 0.70104  
H 2.75813 1.07825 1.00766  
H -2.20765 2.17806 1.13190  
C 2.16682 -0.98907 1.26326  
C -2.28246 -1.20339 1.40072  
H 0.09584 -2.60665 1.28567  
H -3.2458 -1.17347 1.76299  
C -2.47576 1.22931 1.60476  
H -3.56685 1.16002 1.74530  
N 0.77487 -0.65619 1.66628  
H 2.79756 -1.16072 1.52999  
C 0.07204 -1.88595 2.11693  
H 1.50553 1.13636 2.56542  
C -1.36625 -1.62048 2.54172  
H -1.99354 1.17383 2.58382  
H -1.77342 -2.56139 2.94153  
C 0.86661 0.28895 2.82159  
H 0.63024 -3.32393 2.96065  
H -0.11173 0.69653 3.07549  
H -1.40820 -0.91039 3.37819  
H 1.28383 -0.24080 3.69426  
O -0.44218 2.19838 -0.40203

53  
2<sup>Co</sup> Half side-on/end-on (3)  
Co -0.08703 0.54619 0.06551  
H 1.70826 -1.59192 -3.66065  
H -0.63966 -1.59471 -3.43585  
H -1.39641 0.59228 -3.73388  
H 1.26977 0.09556 -3.57974  
C 1.32138 -0.82113 -2.97680  
H -0.12432 1.49754 -2.85150  
C -0.07229 -1.26991 -2.54312  
C -1.05551 0.93806 -2.74290  
H -2.82030 -0.85596 -2.46067  
H 1.97599 1.91042 -2.31267  
H 0.00543 -2.13883 -1.87181  
H 3.34281 -0.52521 -2.27202  
H -1.79687 1.62680 -2.33039  
N -0.87324 -0.23013 -1.83312  
H 3.58914 1.69390 -1.58114  
C 2.33478 -0.68907 -1.84645

C -2.22159 -0.79048 -1.53457  
H -2.08373 -1.81971 -1.17553  
C 2.50345 1.69069 -1.37749  
H 2.37587 -1.65053 -1.31740  
H -3.07537 1.07969 -0.84732  
N 2.06649 0.38124 -0.84391  
H 2.26330 2.47890 -0.65648  
C -2.96021 0.04562 -0.49909  
H -3.97940 -0.35896 -0.35506  
H 3.85553 -0.24964 0.15453  
O 0.25096 2.16031 0.79993  
C 2.82273 0.06716 0.39197  
H -2.40168 -2.01314 0.74402  
N -2.21955 0.08505 0.78560  
H 2.01201 -1.93526 0.59661  
H 2.90307 0.98992 0.98100  
H -2.50508 2.15401 1.10925  
C 2.13119 -1.02383 1.19782  
C -2.42538 -1.21031 1.49319  
H -0.02323 -2.49798 1.20026  
H -3.44272 -1.21589 1.92717  
C -2.72464 1.20577 1.61212  
H -3.81282 1.11662 1.77763  
N 0.77097 -0.60416 1.64419  
H 2.74857 -1.29521 2.07224  
C 0.00984 -1.81831 2.06560  
H 1.60955 1.11861 2.57815  
C -1.40623 -1.55373 2.57449  
H -2.22564 1.20861 2.58746  
H -1.75270 -2.48375 3.05011  
C 0.93193 0.29705 2.82337  
H 0.58670 -2.33078 2.85813  
H -0.02595 0.73860 3.10754  
H -1.40406 -0.80680 3.37962  
H 1.34183 -0.27018 3.67578  
O -0.48032 2.38249 -0.31804

53  
2<sup>Co</sup> Side-on (5)  
Co -0.07434 0.36904 -0.00306  
H 1.72185 -1.50124 -3.70703  
H -0.63124 -1.43214 -3.64600  
H -1.60662 0.70724 -3.79583  
H 1.35217 0.19477 -3.53189  
C 1.31979 -0.76351 -2.99610  
H -0.21181 1.52751 -3.02765  
C -0.11952 -1.18092 -2.69780  
C -1.15732 1.01452 -2.83550  
H -2.90489 -0.82459 -2.52461  
H 1.89127 1.87825 -2.23153  
H -0.11156 -2.09902 -2.08873  
H 3.30773 -0.68028 -2.15004  
H -1.81721 1.73074 -2.33922  
N -0.94013 -0.17058 -1.96764  
H 3.53713 1.59874 -1.59498  
C 2.26265 -0.75715 -1.79383  
C -2.26089 -0.77261 -1.62857  
H -2.08358 -1.80929 -1.30817  
C 2.46444 1.62447 -1.33439  
H 2.17527 -1.72630 -1.28075  
H -3.11726 1.05034 -0.84164  
N 2.02583 0.31788 -0.78719  
H 2.28669 2.40779 -0.59113  
C -2.96398 0.00960 -0.52976  
H -3.96519 -0.42178 -0.34749  
H 3.85099 -0.30384 0.15463  
O 0.15468 2.18172 0.82605  
C 2.83213 0.02481 0.42988  
H -2.23949 -2.06937 0.70851  
N -2.16461 0.03554 0.72642  
H 2.04197 -1.96720 0.74681  
H 2.94013 0.96436 0.98658  
H -2.51710 2.09773 1.03479  
C 2.17303 -1.03014 1.30544  
C -2.35215 -1.25853 1.44323  
H 0.08874 -2.52219 1.40391  
H -3.39494 -1.30810 1.80995  
C -2.65302 1.15316 1.70688  
H -3.72048 1.01967 1.81952  
N 0.82733 -0.59153 1.77250  
H 2.82536 -1.26230 2.16614  
C 0.05664 -1.78698 2.22346  
H 1.61833 1.20032 2.59333  
C -1.39900 -1.52473 2.60743  
H -2.07807 1.20817 2.49993  
H -1.76227 -2.43675 3.10498  
C 0.99296 0.35837 2.90134  
H 0.58170 -2.24434 3.08322  
H 0.02640 0.76835 3.20560  
H -1.47186 -0.73895 3.37092  
H 1.46028 -0.14973 3.76286  
O -0.40138 2.34659 -0.38185

53  
2<sup>Co</sup> End-on (1)  
Co -0.07206 0.30066 -0.01066  
H 1.69651 -1.67461 -3.58527  
H -0.67373 -1.35377 -3.72285  
H -1.61847 0.87389 -3.75180  
H 1.42499 0.04708 -3.53368  
C 1.28800 -0.87342 -2.95082  
H -0.06653 1.46467 -3.09699  
C -0.19135 -1.18308 -2.74148  
C -1.05734 1.09117 -2.82628  
H -2.97191 -0.54281 -2.54437  
H 1.81660 1.75364 -2.30747  
H -0.28381 -2.11935 -2.16914  
H 3.20393 -0.87079 -1.95826  
H -1.55947 1.88248 -2.25986  
N -0.93688 -0.13488 -1.99700  
H 3.45129 1.49145 -1.63695  
C 2.13430 -0.85582 -1.67992  
C -2.30032 -0.62781 -1.67124  
H -2.23093 -1.69718 -1.43059  
C 2.37853 1.55789 -1.39129  
H 1.93769 -1.77969 -1.11670  
H -2.92564 1.22563 -0.75389  
N 1.92235 0.29923 -0.74616  
H 2.20508 2.39542 -0.70929  
C -2.87309 0.15695 -0.50794  
H -3.89618 -0.18603 -0.27614  
H 3.80919 -0.18976 0.14873  
O -0.05747 2.12537 -0.10511  
C 2.78669 0.09159 0.45639  
H -1.92794 -2.05738 0.53037  
N -2.01033 0.04799 0.71196  
H 2.17995 -1.94250 0.89151  
H 2.86256 1.05700 0.97282  
H -2.32712 2.06468 1.23635  
C 2.21086 -0.96103 1.38268  
C -2.18223 -1.31973 1.30472  
H 0.28040 -2.61195 1.56873  
H -3.25304 -1.45244 1.53992  
C -2.50938 1.07420 1.66932  
H -3.58915 0.93414 1.84256  
N 0.82367 -0.59950 1.77964  
H 2.85685 -1.07086 2.27246  
C 0.13461 -1.80886 2.30727  
H 1.38693 1.34223 2.44264  
C -1.35821 -1.62326 2.55350  
H -1.99313 0.99934 2.62976  
H -1.73511 -2.57444 2.95884  
C 0.88898 0.44926 2.83158  
H 0.62894 -2.13222 3.24253  
H -0.11515 0.74484 3.14321  
H -1.54332 -0.88486 3.34461  
H 1.44060 0.07475 3.71211  
O -1.12382 2.87505 -0.24202

53  
2<sup>Co</sup> End-on (3)  
Co -0.06189 0.31530 0.00034  
H 1.69905 -1.66961 -3.58883  
H -0.66947 -1.35500 -3.72723  
H -1.63936 0.88140 -3.74030  
H 1.42476 -0.05115 -3.53213  
C 1.28968 -0.87105 -2.95160  
H -0.06938 1.45138 -3.11189  
C -0.19013 -1.18415 -2.74439  
C -1.05996 1.09009 -2.82400  
H -2.97433 -0.55189 -2.53906  
H 1.82614 1.75778 -2.30405  
H -0.28141 -2.12231 -2.17463  
H 3.20880 -0.87537 -1.96502  
H -1.54053 1.88727 -2.24628  
N -0.93882 -0.13921 -1.99979  
H 3.46425 1.49367 -1.64097  
C 2.14019 -0.85557 -1.68273  
C -2.29943 -0.63244 -1.66788  
H -2.22783 -1.70108 -1.42391  
C 3.29223 1.55914 -1.39113  
H 1.94265 -1.77887 -1.11867  
H -2.92405 1.22366 -0.75435  
N 1.93775 0.30007 -0.74756  
H 2.22162 2.39499 -0.70606  
C -2.87414 0.15523 -0.50606  
H -3.89926 -0.18545 -0.27939  
H 3.81984 -0.20208 0.15077  
O -0.06232 2.11427 -0.10651  
C 2.79866 0.08763 0.45535  
H -1.94172 -2.05699 0.53590  
N -2.02062 0.04815 0.71941  
H 2.18069 -1.94282 0.89140  
H 2.88064 1.05279 0.97139

H -2.33371 2.06461 1.24503  
C 2.21280 -0.96055 1.38087  
C -2.19064 -1.31873 1.31133  
H 0.27500 -2.60549 1.55599  
H -3.26003 -1.45155 1.55343  
C -2.52637 1.07363 1.67377  
H -3.60837 0.93649 1.83571  
N 0.82319 -0.59419 1.77097  
H 2.85194 -1.07159 2.27496  
C 0.13309 -1.80486 2.29800  
H 1.39442 1.34396 2.43756  
C -1.35797 -1.62117 2.55450  
H -2.02088 0.99441 2.63989  
H -1.72975 -2.57322 2.96249  
C 0.88594 0.45557 2.82322  
H 0.63394 -2.13164 3.22863  
H -0.11945 0.75882 3.12282  
H -1.53868 -0.88314 3.34697  
H 1.42608 0.07749 3.70899  
O -1.13645 2.86264 -0.22424

53  
2<sup>co</sup> End-on (5)  
Co -0.06416 0.37741 -0.01264  
H 1.71818 -1.54695 -3.71460  
H -0.64869 -1.36198 -3.67709  
H -1.69096 0.87347 -3.58590  
H 1.38141 0.15587 -3.55507  
C 1.32682 -0.79654 -3.01096  
H -0.11240 1.45272 -2.98593  
C -0.12037 -1.18816 -2.72094  
C -1.08445 1.05618 -2.68219  
H -2.86084 -0.32077 -2.53854  
H 1.91579 1.84085 -2.28360  
H -0.13424 -2.14120 -2.16989  
H 3.31052 -0.74202 -2.15325  
H -1.56190 1.82296 -2.06192  
N -0.90589 -0.20722 -1.91422  
H 3.55522 1.56709 -1.63504  
C 2.26166 -0.79455 -1.80326  
C -2.23432 -0.79494 -1.62255  
H -2.08648 -1.83852 -1.31505  
C 2.48149 1.59639 -1.37875  
H 2.15107 -1.75347 -1.27639  
H -3.13472 1.01827 -0.84966  
N 2.03656 0.29896 -0.81460  
H 2.29986 2.39151 -0.64848  
C -2.96807 -0.01952 -0.53445  
H -3.96570 -0.46420 -0.36334  
H 3.85441 -0.32537 0.13977  
O -0.04572 2.20115 0.43758  
C -2.83797 0.01759 0.40692  
H -2.21099 -0.08773 0.70416  
N -2.18045 0.01730 0.72620  
H 2.05752 -1.97300 0.76205  
H 2.95824 0.96365 0.95055  
H -2.55887 2.07777 1.03926  
C 2.16618 -1.01844 1.29452  
C -2.34727 -1.28059 1.43853  
H 0.11459 -2.54410 1.45525  
H -3.39172 -1.35307 1.79774  
C -2.69415 1.12708 1.56601  
H -3.76472 0.98241 1.79573  
N 0.80368 -0.58089 1.71337  
H 2.79600 -1.21565 2.18035  
C 0.06316 -1.76834 2.23453  
H 1.48679 1.31031 2.40870  
C -1.39709 -1.52492 2.60900  
H -2.14066 1.18191 2.50874  
H -1.74645 -2.43924 3.11239  
C 0.93338 0.44482 2.78390  
H 0.60350 -2.15988 3.11678  
H -0.05263 0.80100 3.09269  
H -1.48667 -0.73538 3.36717  
H 1.45766 0.02344 3.65896  
O -0.60560 3.16811 -0.24150

51  
2<sup>ni</sup> No O<sub>2</sub> (2)  
Ni -0.07587 -0.03471 -0.04478  
H 1.76876 -1.38092 -3.77564  
H -0.60494 -1.23477 -3.80809  
H -1.72415 0.91751 -3.63662  
H 1.40071 0.30303 -3.52182  
C 1.34055 -0.68304 -3.03970  
H -0.19585 1.55304 -2.97449  
C -0.11060 -1.10846 -2.82489  
H -1.14906 1.08904 -2.70796  
H -2.87494 -0.84248 -2.58761  
H 1.64217 1.87289 -2.05544  
H -0.12481 -2.08891 -2.32550  
H 3.29325 -0.61004 -2.12027

H -1.69487 1.79909 -2.07833  
N -0.92055 -0.18351 -1.98233  
H 3.31016 1.71765 -1.44519  
C 2.23986 -0.74764 -1.80591  
C -2.22974 -0.82475 -1.68852  
H -2.03236 -1.86927 -1.41085  
C 2.24225 1.61139 -1.17945  
H 2.16339 -1.75238 -1.36455  
H -3.16203 0.93278 -0.85388  
N 1.93348 0.23537 -0.72480  
H 2.00122 2.32034 -0.37897  
C -2.93985 -0.09985 -0.55785  
H -3.91028 -0.58244 -0.34547  
H 3.78600 -0.43391 0.13654  
C 2.79251 -0.07211 0.45551  
H -2.19631 -2.14676 0.77810  
N -2.09129 -0.05227 0.66807  
H 1.98365 -2.04190 0.82621  
H 2.96283 0.86425 1.00135  
H -2.28981 2.04491 0.86365  
C 2.12819 -1.09381 1.36229  
C -2.33139 -1.29468 1.46030  
H 0.11873 -2.59577 1.66964  
H -3.38959 -1.30548 1.78792  
C -2.47701 1.14232 1.45662  
H -3.54589 1.11189 1.73727  
N 0.78785 -0.61652 1.79695  
H 2.77644 -1.30442 2.23398  
C 0.04064 -1.76413 2.38578  
H 1.46739 1.31508 2.37544  
C -1.43318 -1.49369 2.68036  
H -1.88348 1.20918 2.37242  
H -1.81744 -2.37935 3.20929  
C 0.95361 0.45217 2.81088  
H 0.54540 -2.08629 3.31768  
H -0.02139 0.79586 3.16659  
H -1.54994 -0.66904 3.39715  
H 1.53458 0.08734 3.67804

51  
2<sup>ni</sup> No O<sub>2</sub> (4)  
Ni -0.07254 0.56582 0.01091  
H 1.64428 -1.60392 -3.70715  
H -0.70146 -1.50207 -3.50832  
H -1.53780 0.75784 -3.63748  
H 1.27539 0.09791 -3.60043  
C 1.28534 -0.82969 -3.01214  
H -0.10194 1.48973 -2.84599  
C -0.12823 -1.23609 -2.60037  
C -1.06977 1.01397 -2.66982  
H -2.86851 -0.80614 -2.43794  
H 1.99147 1.84217 -2.38295  
H -0.08612 -1.13853 -1.97141  
H 3.31714 -0.64873 -2.30155  
H -1.68925 1.74335 -2.13920  
N -0.90404 -0.21117 -1.84373  
H 3.59947 1.64349 -1.63241  
C 2.30122 -0.75401 -1.87537  
C -2.24767 -0.76805 -1.52490  
H -2.10521 -1.80709 -1.19687  
C 2.51127 1.63614 -1.44055  
H 2.28662 -1.71207 -1.33744  
H -3.07919 1.08313 -0.76955  
N 2.08044 0.33476 -0.88800  
H 2.24446 2.43010 -0.73173  
C -2.96127 0.03895 -0.45206  
H -3.97936 -0.36672 -0.30245  
H 3.87413 -0.27458 0.10987  
C 2.84397 0.04921 0.34891  
H -2.31310 -2.05430 0.75660  
N -2.20415 0.04633 0.82163  
H 2.05787 -1.95142 0.63716  
H 2.92905 0.98910 0.90969  
H -2.44970 2.10872 1.18019  
C 2.16303 -1.01264 1.19753  
C -2.37467 -1.25837 1.51173  
H 0.07003 -2.53569 1.31183  
H -3.39561 -1.30683 1.93573  
C -2.68760 1.15617 1.67020  
H -3.77589 1.07612 1.84446  
N 0.79964 -0.59591 1.63085  
H 2.78591 -1.23701 2.08173  
C 0.07153 -1.79871 2.12942  
H 1.49804 1.27353 2.36139  
H -1.35848 -1.56157 2.60984  
H -2.17992 1.14422 2.64090  
H -1.68452 -2.49439 3.09425  
C 0.92539 0.41169 2.71719  
H -0.65815 -2.23805 2.95779  
H -0.05907 0.78569 3.00867  
H -1.38997 -0.80377 3.40393  
H 1.42616 -0.03691 3.59452

53  
2<sup>ni</sup> Side-on (2)  
Ni -0.07285 0.46594 0.00370  
H 1.71517 -1.60131 -3.64583  
H -0.64704 -1.56358 -3.48784  
H -1.43957 0.61195 -3.75323  
H 1.29025 0.09044 -3.57257  
C 1.31560 -0.82859 -2.97173  
H -0.12083 1.48360 -2.90727  
C -0.09330 -1.26416 -2.57831  
H -2.85498 -0.80889 -2.47372  
H 1.90106 1.88848 -2.29258  
H -0.04428 -2.14572 -1.92115  
H 3.17133 -0.55253 -2.21028  
H -1.77316 1.65963 -2.33927  
N -0.88882 -0.22204 -1.86841  
H 3.51202 1.70440 -1.54600  
C 2.29748 -0.70969 -1.81248  
C -2.23907 -0.76773 -1.55802  
H -2.11119 -1.80382 -1.21573  
C 2.42521 1.68298 -1.35346  
H 2.31374 -1.67048 -1.28044  
H -3.02848 1.11256 -0.83058  
N 2.01786 0.36375 -0.81480  
H 2.15707 2.46131 -0.63204  
C -2.93266 0.07164 -0.49804  
H -3.95566 -0.30944 -0.32503  
H 3.83836 -0.21458 0.15341  
O 0.18495 2.17127 0.82592  
C 2.80435 0.07711 0.41236  
H -2.34345 -2.01830 0.70885  
N -2.15529 0.07932 0.76813  
H 2.06176 -1.94711 0.65662  
H 2.86880 1.00803 0.98949  
H -2.38880 2.14858 1.11799  
C 2.14865 -1.01871 1.23617  
C -2.38027 -1.22074 1.46306  
H 0.02604 -2.53844 1.24874  
C -3.40800 -1.22049 1.87149  
H -2.62537 1.20215 1.61428  
H -3.71312 1.12760 1.78765  
N 0.07756 -0.62049 1.65951  
H 2.76843 -1.24949 2.12045  
C 0.03317 -1.83607 2.09630  
H 1.56864 1.14143 2.55594  
C -1.39426 -1.57642 2.56964  
H -2.11748 1.8623 2.58381  
H -1.75599 -2.50994 3.02642  
C 0.90353 0.31427 2.81468  
H 0.60175 -2.31856 2.91339  
H -0.06505 0.74891 3.06863  
H -1.41276 -0.83612 3.38039  
H 1.30807 -0.22404 3.68852  
O -0.43591 2.30126 -0.37811

53  
2<sup>ni</sup> Side-on TS (4)  
Ni -0.07534 0.39800 -0.00398  
H 1.72852 -1.55795 -3.66434  
H -0.64568 -1.44485 -3.65424  
H -1.56656 0.70426 -3.78323  
H 1.34908 1.04126 -3.54060  
C 1.30710 -0.80387 -2.98254  
H -0.16306 1.49301 -3.00431  
C -0.13517 -1.21521 -2.69906  
C -1.11808 0.99616 -2.81724  
H -2.91271 -0.78480 -2.51698  
H 1.86063 1.87105 -2.25941  
H -0.13968 -2.13849 -2.09940  
H 3.27103 -0.70984 -2.08752  
H -1.76990 1.72228 -2.32495  
N -0.92821 -0.19973 -1.95620  
H 3.50482 1.57192 -1.63136  
C 2.21632 -0.76734 -1.75781  
C -2.26242 -0.76087 -1.62338  
H -2.11980 -1.80434 -1.31030  
C 2.43572 1.62540 -1.36122  
H 2.10210 1.71819 -1.21924  
H -3.06668 1.08735 -0.83840  
N 1.97911 0.33900 -0.78018  
H 2.28669 2.42902 -0.63348  
C -2.93332 0.04496 -0.52273  
H -3.94131 -0.36043 -0.32033  
H 3.82477 -0.23337 0.14536  
O 0.15568 2.31015 0.83307  
C 2.79978 0.06356 0.43287  
H -2.18394 -2.04616 0.65708  
H -2.11813 0.05777 0.72530  
H 0.08600 -1.95951 0.75344  
H 2.88651 0.90362 0.99270

H -2.51726 2.10791 1.07508  
C 2.17484 -1.01364 1.30416  
C -2.30917 -1.25686 1.41084  
H 0.11811 -2.56218 1.39825  
H -3.35892 -1.31088 1.75551  
C -2.61876 1.15061 1.59554  
H -3.67915 0.98820 1.85587  
N 0.81433 -0.61647 1.74939  
H 2.82834 -1.21210 2.17318  
C 0.07393 -1.82089 2.21057  
H 1.57529 1.18795 2.58039  
C -1.38330 -1.56352 2.58382  
H -2.03434 1.20303 2.51910  
H -1.76296 -2.48762 3.04565  
C 0.94847 0.34291 2.87607  
H 0.59984 -2.25880 3.08080  
H -0.02595 0.74723 3.16119  
H -1.46384 -0.80120 3.37045  
H 1.40114 -0.15628 3.75112  
O -0.39890 2.43435 -0.34867

53  
2<sup>ni</sup> End-on (2)  
Ni -0.07144 0.20618 -0.01471  
H 1.70666 -1.56512 -3.67166  
H -0.65182 -1.28865 -3.72073  
H -1.61067 0.91681 -3.69496  
H 1.43105 1.5076 -3.52838  
C 1.31952 -0.79725 -2.98472  
H -0.11976 1.56289 -2.94948  
C -0.15062 -1.13326 -2.74656  
C -1.09588 1.11851 -2.73934  
H -2.91297 -0.69046 -2.56652  
H 1.82278 1.79845 -2.26793  
H -0.21099 -2.08748 -2.20043  
H 3.27115 -0.80178 -2.05496  
H -1.66820 1.85269 -2.16429  
N -0.93181 -0.13268 -1.95918  
H 3.47242 1.52481 -1.64803  
C 2.20974 -0.82747 -1.74223  
C -2.27125 -0.71664 -1.66737  
H -2.12442 -1.77589 -1.41520  
C 2.40473 1.56863 -1.37087  
H 2.05355 -1.78202 -1.21735  
H -3.10790 1.06391 -0.77829  
N 1.97515 0.27983 -0.77112  
H 2.24622 2.37295 -0.64590  
C -2.95455 0.00780 -0.52268  
H -3.95554 -0.42636 -0.34673  
H 3.82204 -0.24616 0.18462  
O -0.29364 2.15614 0.11007  
C 2.79617 0.06374 0.45410  
H -2.13051 -2.13772 0.64898  
N -2.13785 -0.03321 0.72212  
H 2.09189 -1.93847 0.87008  
H 2.87387 1.03160 0.96534  
H -2.46244 2.01951 1.10975  
C 2.16785 -0.96545 1.37439  
C -2.31364 -1.35026 1.39511  
H 0.18861 -2.54850 1.51120  
H -3.36947 -1.44955 1.71196  
C -2.61253 1.05771 1.60944  
H -3.68215 0.92598 1.84937  
N 0.79329 -0.55667 1.78644  
H 2.80693 -1.11459 2.26277  
C 0.07774 -1.77201 2.28377  
H 1.37371 1.36316 2.48286  
C -1.40493 -1.59326 2.59954  
H -2.04652 1.07431 2.54502  
H -1.74040 -2.53396 3.06216  
C 0.89116 0.45863 2.86572  
H 0.59823 -2.14165 3.18722  
H -0.10703 0.74640 3.06660  
H -1.55765 -0.82931 3.37375  
H 1.45843 0.05645 3.72337  
O 0.57091 2.85184 0.78287

53  
2<sup>ni</sup> End-on (4)  
Ni -0.07190 0.22744 -0.02943  
H 1.69511 -1.60430 -3.68111  
H -0.65945 -1.32377 -3.70645  
H -1.61647 0.89890 -3.71046  
H 1.42999 0.11425 -3.55167  
C 1.31951 -0.82773 -2.99758  
H -0.09000 1.51923 -3.02139  
C -0.15002 -1.15173 -2.73944  
H -0.17259 1.10934 -2.77301  
H -2.91008 -0.66134 -2.56642  
H 1.84932 1.77466 -2.29451  
H -0.21139 -2.09405 -2.17318  
H 3.28190 -0.82731 -2.08989

H -1.60444 1.87134 -2.19461  
N -0.91985 -0.12892 -1.96889  
H 3.49835 1.50636 -1.67003  
C 2.22373 -0.85068 -1.76551  
C -2.26680 -0.69207 -1.66876  
H -2.13560 -1.75199 -1.41070  
C 2.42954 1.54621 -1.39606  
H 2.07283 -1.80214 -1.23392  
H -3.05957 1.11181 -0.78840  
N 1.99878 0.25901 -0.79581  
H 2.26372 2.35433 -0.67755  
C -2.93505 0.05289 -0.52877  
H -3.94461 -0.35948 -0.34898  
H 3.83997 -0.29663 0.15447  
O 0.03404 2.15236 0.25401  
C 2.80799 0.03397 0.42542  
H -0.08764 -2.10056 0.63238  
N -2.11875 0.00176 0.71689  
H 2.08878 -1.95334 0.85631  
H 2.92649 1.00108 0.93362  
H -2.49278 2.04420 1.11660  
C 2.17899 -0.97876 1.35472  
C -2.28849 -1.32232 1.37907  
H 0.20248 -2.54486 1.53680  
H -3.34699 -1.43247 1.68263  
C -2.60920 1.07735 1.61606  
H -3.67223 0.91496 1.86623  
N 0.81107 -0.55107 1.76632  
H 2.81857 -1.13166 2.24243  
C 0.09079 -1.75082 2.29092  
H 1.43989 1.36505 2.34349  
H -1.39259 -1.52061 2.59410  
H -2.03494 1.10636 2.54666  
H -1.73625 -2.49550 3.06235  
C 0.92006 0.48478 2.82407  
H 0.60674 -2.10063 3.20501  
H -0.07446 0.80878 3.14157  
H -1.54711 -0.78878 3.36002  
H 1.46535 0.08995 3.69936  
O -0.89118 2.95669 -0.15898

51  
2<sup>cu</sup> No O<sub>2</sub> (1)  
Cu -0.05510 -0.03415 -0.08576  
H 1.70055 -1.39998 -3.78436  
H -0.64425 -1.16125 -3.76274  
H -1.59199 1.04930 -3.52035  
H 1.40161 0.28930 -3.49693  
C 1.32941 -0.69852 -3.02091  
H -0.10340 1.60918 -2.70092  
C -0.13367 -1.08788 -2.78217  
H -2.87437 -0.76178 -2.56898  
H 2.15474 1.84170 -2.25513  
H -0.16937 -2.08704 -2.32300  
H 3.38227 -0.85136 -2.20909  
H -1.66690 1.60918 -2.19042  
N -0.92420 -0.17817 -1.89781  
H 3.77928 1.48159 -1.61776  
C 2.28756 -0.80509 -1.82769  
H -2.26352 -0.78186 -1.64610  
H -2.10223 -1.83941 -1.39566  
C 2.70574 1.54866 -1.35415  
H 2.10007 -1.76077 -1.31502  
H -3.28513 0.94808 -0.83801  
N 2.18594 0.27819 -0.81857  
H 2.57773 2.34308 -0.60865  
C -3.04133 -0.07783 -0.53142  
H -4.01088 -0.59900 -0.40514  
H 3.91852 -0.52438 0.16222  
C 2.93156 -0.08373 0.40636  
H -2.12495 -2.08837 0.73465  
N -2.30306 0.00421 0.74698  
H 2.05452 -0.23226 0.81235  
H 3.13966 0.84496 0.95427  
H -2.77825 2.04040 1.04394  
C 2.18251 -1.06297 1.31333  
C -2.35566 -1.29537 1.46201  
O 1.05353 -2.56961 1.66896  
H -3.39327 -1.47824 1.80974  
C -2.87040 1.08412 1.57348  
H -3.93905 0.91222 1.80799  
N 0.82368 -0.58374 1.69614  
H 2.79440 -1.24593 2.21719  
C 0.07466 -1.70368 2.34328  
H 1.47815 1.38611 2.16269  
C -1.40222 -1.43837 2.65502  
H -2.32676 1.16923 2.52097  
H -1.74572 -2.31194 3.23055  
C 0.93592 0.55968 2.63339  
H 0.59118 -1.97829 2.28434  
H -0.05984 0.92443 2.90157

H -1.51135 -0.59225 3.34788  
H 1.46808 0.26272 3.55544

51

<sup>2</sup>Cu No O<sub>2</sub> (3)  
Cu -0.06676 0.43236 0.00012  
H 1.72238 -1.56876 -3.70593  
H -0.62718 -1.40547 -3.68403  
H -1.64104 0.80603 -3.73864  
H 1.39739 0.13911 -3.55948  
C 1.33335 -0.80986 -3.01044  
H -0.13586 1.48901 -3.04552  
C -0.12018 -1.18577 -2.72481  
C -1.10548 1.04672 -2.80202  
H -2.89232 -0.79678 -2.52669  
H 1.90211 1.80210 -2.28255  
H -0.14302 -2.11417 -2.13313  
H 3.31398 -0.74967 -2.15675  
H -1.66097 1.79790 -2.23139  
N -0.91957 -0.17327 -1.98498  
H 3.51878 1.62933 -1.53896  
C 2.26803 -0.81089 -1.80022  
C -2.24125 -0.75710 -1.63407  
H -2.07417 -1.79704 -1.32016  
C 2.43128 1.59288 -1.34813  
H 2.16786 -1.77407 -1.27888  
H -3.04528 1.07662 -0.82475  
N 2.04503 0.27139 -0.80819  
H 2.13920 2.36334 -0.62301  
C -2.93276 0.02488 -0.53233  
H -3.94936 -0.37614 -0.36765  
H 3.85037 -0.30917 0.17605  
C 2.82407 0.01172 0.43131  
H -2.21868 -2.09617 0.69918  
N -2.16108 0.00390 0.73865  
H 2.03882 -1.97543 0.76943  
H 2.91113 0.96467 0.96840  
H -2.32283 2.07450 1.07506  
C 2.16356 -1.03024 1.31490  
C -2.34333 -1.29205 1.43886  
H 0.12431 -2.54586 1.46073  
H -3.38802 -1.35289 1.79848  
C -2.59348 1.13947 1.58221  
H -3.68244 1.09419 1.76238  
N 0.81877 -0.59673 1.78033  
H 2.81524 -1.24683 2.18113  
C 0.06547 -1.78693 2.25578  
H 1.48715 1.28846 2.47248  
C -1.40224 -1.55398 2.61516  
H -2.07692 1.12271 2.54652  
H -1.75571 -2.47935 3.09460  
C 0.95879 0.41005 2.85670  
H 0.58345 -2.20583 3.13918  
H -0.02555 0.75496 3.18488  
H -1.50386 -0.77970 3.38714  
H 1.50353 -0.01898 3.71785

53

<sup>2</sup>Cu Side-on (1)  
Cu -0.07117 0.52437 0.03266  
H 1.68987 -1.48976 -3.72656  
H -0.62289 -1.52836 -3.47813  
H -1.51422 0.62891 -3.75204  
H 1.29915 0.19894 -3.53168  
C 1.33148 -0.75576 -2.98875  
H -0.21387 1.53888 -2.92022  
C -0.07187 -1.20244 -2.57542  
C -1.13809 0.97444 -2.77327  
H -2.83129 -0.90994 -2.46072  
H 2.08519 1.89500 -2.28237  
H 0.00179 -2.07726 -1.91131  
H 3.37803 -0.60265 -2.30271  
H -1.86953 1.65820 -2.33373  
N -0.90987 -0.18467 -1.87186  
H 3.70077 1.63095 -1.57255  
C 2.36631 -0.71762 -1.86619  
C -2.22361 -0.80525 -1.54389  
H -2.02570 -1.82229 -1.17777  
C 2.61632 1.64272 -1.35741  
H 2.35741 -1.69385 -1.36098  
H 3.15730 1.01854 -0.83966  
N 2.15247 0.33773 -0.84495  
H 2.40382 2.42487 -0.61967  
C -3.00294 -0.01402 -0.49964  
H -4.00973 -0.45987 -0.38584  
H 3.90104 -0.37437 0.17597  
O 0.23367 2.39452 0.78480  
C 2.88094 -0.00445 0.39485  
H -2.39295 -0.26217 0.77775  
N -2.28901 0.03917 0.79342  
H 1.97761 -1.96067 0.61574  
H 3.00349 0.91745 0.97880

H -2.62526 2.10420 1.09882  
C 2.13584 -1.05226 1.21299  
C -2.45024 -1.24735 1.51351  
H -0.01946 -2.47460 1.25318  
H -3.46597 -1.29479 1.95254  
C -2.81363 1.15302 1.60953  
H -3.89948 1.04662 1.78913  
N 0.79411 -0.58275 1.66740  
H 2.74393 -1.34693 2.08679  
C 0.00858 -1.77765 2.10478  
H 1.65993 1.14766 2.55062  
C -1.41297 -1.51322 2.60180  
H -2.30784 1.18111 2.58134  
H -1.73285 -2.42208 3.13370  
C 0.97277 0.34151 2.82014  
H 0.57849 -2.27982 2.90934  
H 0.02030 0.80083 3.09754  
H -1.42394 -0.72109 3.36237  
H 1.37936 -0.20665 3.68757  
O -0.48137 2.44054 -0.31411

53

<sup>2</sup>Cu End-on (1)  
Cu -0.07462 0.35004 -0.00481  
H 1.71419 -1.59540 -3.65459  
H -0.64950 -1.35755 -3.75598  
H -1.61350 0.85303 -3.76929  
H 1.40441 0.11527 -3.52466  
C 1.29859 -0.82952 -2.98216  
H -0.11696 1.49494 -3.03599  
C -0.17324 -1.18396 -2.77087  
H -1.09782 1.06501 -2.81495  
H -2.96598 -0.66924 -2.54899  
H 1.90206 1.79022 -2.29166  
H -0.23671 -2.13086 -2.21248  
H 3.23676 -0.86161 -2.03277  
H -1.66512 1.81772 -2.25847  
N -0.94968 -0.17166 -2.01228  
H 3.53799 1.49514 -1.64156  
C 2.17303 -0.83911 -1.72742  
C -2.29040 -0.70347 -1.67378  
H -2.17822 -1.76366 -1.40831  
C 2.46655 1.56192 -1.38277  
H 1.98106 -1.77087 -1.17594  
H -3.04095 1.13100 -0.80473  
N 1.99615 0.29721 -0.77148  
H 2.31350 2.38664 -0.67896  
C -2.92311 0.07506 -0.52798  
H -3.93526 -0.31958 -0.32407  
H 3.83854 -0.28422 0.14895  
O 0.01114 2.38493 0.07888  
C 8.22203 0.03789 0.44059  
H -1.98569 -2.05853 0.58989  
N -2.10354 0.04166 0.71790  
H 2.12675 -1.97558 0.85065  
H 2.93483 0.99224 0.97147  
H -2.49157 2.07034 1.15918  
C 2.20293 -1.00564 1.36023  
C -2.23224 -1.30623 1.35212  
H 0.22897 -2.60026 1.57813  
H -3.29568 -1.45502 1.61854  
C -2.62656 1.08897 1.62778  
H -3.69956 0.92596 1.83040  
N 0.84204 -0.61073 1.79574  
H 2.86717 -1.15781 2.23149  
C 0.11649 -1.79545 2.32067  
H 1.47042 1.31086 2.45126  
C -1.37033 -1.56814 2.58721  
H -2.08921 1.08044 2.58088  
H -1.75237 -2.49429 3.04303  
C 0.94449 0.43428 2.84217  
H 0.60285 -2.14571 3.25214  
H -0.05071 0.76413 3.15295  
H -1.52375 -0.79584 3.35290  
H 1.48487 0.05191 3.72727  
O -0.01912 3.12473 -0.11667

53

<sup>2</sup>Cu End-on (3)  
Cu -0.07819 0.36239 -0.00486  
H 1.71166 -1.57910 -3.66394  
H -0.64793 -1.35638 -3.75025  
H -1.61608 0.84513 -3.77228  
H 1.39986 0.12969 -3.52913  
C 1.29967 -0.81840 -2.98335  
H -0.13130 1.50485 -3.02966  
C -0.17013 -1.7838 -2.66662  
C -1.10866 1.06348 -2.81497  
H -2.96345 -0.68371 -2.54918  
H 1.92947 1.79671 -2.28830  
H -0.22796 -2.12438 -2.20621  
H 3.24448 -0.86165 -2.04747

H -1.68978 1.81060 -2.26502  
N -0.95271 -0.16922 -2.00881  
H 3.56589 1.48563 -1.64681  
C 2.18309 -0.83492 -1.73486  
C -2.29022 -0.71090 -1.67191  
H -2.16956 -1.76957 -1.40440  
C 2.49602 1.55954 -1.38261  
H 1.99073 -1.76792 -1.18558  
H -3.06820 1.11532 -0.80883  
N 2.01478 0.29801 -0.77535  
H 2.35504 2.38328 -0.67511  
C -2.93612 0.06189 -0.52857  
H -3.94436 -0.34610 -0.33038  
H 3.84739 -0.30743 0.15052  
O 0.01458 2.39078 0.06697  
C 2.83330 0.02727 0.43749  
H -1.98839 -2.05705 0.59745  
N -2.12235 0.04179 0.71984  
H 2.11465 -1.97846 0.84186  
H 2.95596 0.97926 0.97052  
H -2.53410 2.06743 1.15842  
C 2.20103 -1.01137 1.35522  
C -2.23985 -1.30468 1.35797  
H 0.22140 -2.59339 1.57950  
H -3.30163 -1.46208 1.62705  
C -6.35906 1.08433 1.62574  
H -3.73086 0.91213 1.82800  
N 0.84397 -0.60643 1.79319  
H 2.86447 -1.17350 2.22536  
C 0.11880 -1.78722 2.32125  
H 1.49155 1.30755 2.45129  
H -1.37193 -1.55587 2.59134  
H -2.12269 1.08299 2.57958  
H -1.75216 -2.47777 0.05716  
C 0.95534 0.43633 2.84028  
H 0.60098 -2.13824 3.25205  
H -0.03716 0.77641 3.14976  
H -1.52140 -0.77697 3.35109  
H 1.49053 0.04887 3.72650  
O -0.99740 3.15097 -0.07992

## Solvent Phase 12-TMC ligand (1)

45

<sup>1</sup>Cr No O<sub>2</sub> (2)  
Cr -2.42217 -13.48890 0.10269  
C -4.42708 -15.58953 1.15891  
H -4.62087 -16.57353 1.62154  
H -4.90281 -15.55022 0.17522  
H -4.85564 -14.80116 1.78764  
N -1.34968 -11.82935 -0.71985  
N -2.96488 -15.35145 1.00094  
N -1.37929 -13.09456 1.89211  
C -0.46601 -11.33603 0.39353  
H -1.00574 -10.51701 0.88700  
H 0.46656 -10.90846 -0.01022  
C -2.10809 -12.25490 2.87870  
H -3.03237 -12.75560 3.18626  
H -2.37971 -11.29522 2.42456  
H -1.48055 -12.07033 3.76728  
C -1.09418 -14.45198 2.44508  
H -0.75767 -14.38905 3.49537  
H -0.26760 -14.88090 1.86556  
C -2.33498 -15.33742 2.36608  
H -2.08358 -16.35991 2.69354  
H -3.09627 -14.95738 3.05912  
C -0.13574 -12.41209 1.42476  
H 0.52334 -13.17687 0.99785  
H 0.40466 -11.95013 2.27028  
C -2.16803 -10.68498 -1.21230  
H -2.85593 -11.03755 -1.98894  
H -2.75844 -10.27923 -0.38343  
N -1.51616 -14.64729 -1.40770  
C -0.58017 -12.39481 -1.88172  
H -1.19975 -12.24057 -2.77423  
H 0.35625 -11.83437 -2.03855  
C -2.33736 -14.87296 -2.62640  
H -3.25249 -15.41671 -2.36884  
H -2.63128 -13.91293 -3.06584  
H -1.76771 -15.45328 -3.37232  
C -1.20802 -15.93743 -0.72222  
H -0.93172 -16.71758 -1.45369  
H -0.33608 -15.77119 -0.07886  
C -2.40402 -16.41554 0.09768  
H -2.12228 -17.31174 0.67488  
H -3.21370 -16.71298 -0.57990  
C -0.27465 -13.88345 -1.73841  
H 0.45606 -14.06301 -0.94042  
H 0.17542 -14.25156 -2.67755

H -1.52591 -9.88805 -1.62746  
45  
<sup>1</sup>Cr No O<sub>2</sub> (4)  
Cr -2.37404 -13.50611 0.10771  
C -4.42838 -15.57346 1.13489  
H -4.62724 -16.55601 1.59804  
H -4.89760 -15.53424 0.14580  
H -4.85980 -14.78128 1.75606  
N -1.34310 -11.83764 -0.71490  
N -2.96034 -15.34773 0.99538  
N -1.39335 -13.05144 1.95866  
C -0.45979 -11.33715 0.39876  
H -0.99187 -10.50151 0.87130  
H 0.48043 -10.93229 -0.00839  
C -2.07420 -12.21641 2.97781  
H -3.01678 -12.68792 3.27739  
H -2.30931 -11.23280 2.55604  
H -1.43151 -12.08832 3.86575  
C -1.11488 -14.42893 2.47429  
H -0.78461 -14.39289 3.52727  
H -0.28385 -14.84277 1.89028  
C -2.34835 -15.32304 2.37111  
H -2.09254 -16.34389 2.69711  
H -3.12399 -14.95189 3.05283  
C -0.14640 -12.39431 1.45571  
H 0.50151 -13.17721 1.04378  
H 0.40699 -11.91899 2.28465  
C -2.19179 -10.70567 -1.18838  
H -2.88220 -11.06494 -1.95929  
H -2.77965 -10.31830 -0.34929  
N -1.53602 -14.67005 -1.48265  
C -0.58910 -12.39325 -1.89433  
H -1.21293 -12.21358 -2.77849  
H 0.35272 -11.84126 -2.04364  
C -2.31997 -14.93503 -2.71369  
H -3.25067 -15.45506 -2.46112  
H -2.58588 -13.98880 -3.19795  
H -1.73750 -15.55419 -3.41762  
C -1.21700 -15.93714 -0.75288  
H -0.93545 -16.73592 -1.46126  
H -0.34406 -15.74414 -0.11858  
C -2.39699 -16.41371 0.09151  
H -2.09448 -17.29539 0.67840  
H -3.21364 -16.73202 -0.56747  
C -0.29506 -13.88759 -1.78451  
H 0.43208 -14.08436 -0.98754  
H 0.16208 -14.23272 -2.72819  
H -1.56322 -9.89785 -1.60265

45

<sup>1</sup>Cr No O<sub>2</sub> (6)  
Cr -2.66016 -13.39258 0.06776  
C -4.49092 -15.64820 1.22573  
H -4.60592 -16.64425 1.68908  
H -5.02067 -15.63579 0.26703  
H -4.93421 -14.89302 1.88403  
N -1.42187 -11.79135 -0.74024  
N -3.03348 -15.32418 0.99791  
N -1.33238 -13.08256 1.93809  
C -0.55074 -11.30974 0.38789  
H -1.12022 -10.53389 0.91578  
H 0.35360 -10.82561 -0.01906  
C -1.97991 -12.28183 2.99493  
H -2.91048 -12.76310 3.31704  
H -2.23963 -11.28854 2.61087  
H -1.31258 -12.16631 3.86932  
C -1.08167 -14.46844 2.38960  
H -0.69953 -14.49820 3.42714  
H -0.29801 -14.89745 1.75546  
C -2.35959 -15.31030 2.33315  
H -2.13060 -16.34311 2.64616  
H -3.08125 -14.91103 3.05697  
C -0.14379 -12.39160 1.39161  
H 0.50528 -13.13962 0.92357  
H 0.45307 -11.91228 2.18974  
C -2.16523 -10.61861 -1.28223  
H -2.83576 -10.95200 -2.08190  
H -2.76459 -10.16915 -0.48285  
N -1.46770 -14.68743 -1.44283  
C -0.61672 -12.39222 -1.86152  
H -1.21922 -12.28089 -2.77221  
H 0.30554 -11.80591 -2.01321  
C -2.19964 -14.95001 -2.69746  
H -3.13513 -15.48037 -2.48584  
H -2.46149 -14.00607 -3.18891  
H -1.59097 -15.56005 -3.39073  
H -1.22868 -15.93948 -0.69204  
H -0.44203 -16.76941 -1.36458  
H -0.38097 -15.78210 -0.01465  
C -2.48457 -16.36685 0.07420  
H -2.27516 -17.29168 0.63859

H -3.27492 -16.60437 -0.64921  
C -0.25798 -13.87217 -1.68654  
H 0.43184 -14.01908 -0.84699  
H 0.27980 -14.20007 -2.59581  
H -1.47246 -9.85834 -1.68511

47

<sup>1</sup>Cr Side-on (2)  
Cr -2.56367 -13.43087 0.08145  
C -4.45177 -15.58873 1.21615  
H -4.61493 -16.57712 1.67470  
H -4.96473 -15.54130 0.25027  
H -4.85919 -14.80824 1.86676  
N -1.37766 -11.82111 -0.73348  
N -3.00002 -15.33521 1.00336  
N -1.35301 -13.12845 1.82158  
C -0.51843 -11.30716 0.38877  
H -1.09860 -10.53232 0.90482  
H 0.38464 -10.82169 -0.01425  
C -2.09332 -12.32171 2.83144  
H -3.02430 -12.82576 3.10678  
H -2.35164 -11.34378 2.41420  
H -1.47120 -12.18410 3.73039  
C -1.05073 -14.48141 2.36653  
H -0.67304 -14.41844 3.40133  
H -0.25012 -14.91543 1.75814  
C -2.30636 -15.34616 2.33938  
H -2.05765 -16.37850 2.63094  
H -3.02742 -14.97083 3.07526  
C -0.13133 -12.96688 1.38117  
H 0.55728 -13.12122 0.93535  
H 0.39020 -11.94305 2.24068  
C -2.19799 -10.68890 -1.27223  
H -2.84699 -11.06444 -2.05480  
H -2.78948 -10.27023 -0.46523  
N -1.48063 -14.62726 -1.32703  
C -0.55643 -12.40343 -1.85321  
H -1.14409 -12.28243 -2.77105  
H 0.37131 -11.82512 -1.98513  
C -2.29471 -14.82553 -2.55921  
H -2.32876 -15.31978 -2.31146  
H -2.53502 -13.85940 -3.01248  
H -1.73742 -15.44185 -3.28295  
C -1.21739 -15.94261 -0.67615  
H -0.94565 -16.70608 -1.42411  
H -0.35634 -15.82739 -0.00760  
C -2.46217 -16.39343 0.07970  
H -2.25454 -17.31914 0.63946  
H -3.25970 -16.62100 -0.63808  
C -0.23306 -13.88100 -1.65373  
H 0.47978 -14.03588 -0.83529  
H 0.23714 -14.27739 2.56958  
H -1.52475 -9.90594 -1.68663  
O -4.18933 -13.12120 -0.80331  
O -4.13029 -12.49236 0.50675

47

<sup>1</sup>Cr Side-on (4)  
Cr -2.56717 -13.42974 0.08073  
C -4.45293 -15.58576 1.21859  
H -4.61741 -16.57391 1.67674  
H -4.96568 -15.53518 0.25285  
H -4.85702 -14.80360 1.86911  
N -1.37688 -11.81996 -0.73476  
N -3.00057 -15.33637 1.00483  
N -1.35070 -13.12692 1.82616  
C -0.52108 -11.30530 0.38973  
H -1.10425 -10.53254 0.90540  
H 0.38049 -10.81688 -0.01253  
C -2.09111 -12.32197 2.83713  
H -3.02173 -12.82685 3.11227  
H -2.35093 -11.34400 2.42090  
H -1.46830 -12.18504 3.73558  
C -1.04847 -14.48177 2.36597  
H -0.66857 -14.42176 3.39992  
H -0.24902 -14.91424 1.75496  
C -2.30415 -15.34659 2.33948  
H -2.05502 -16.37910 2.62936  
H -3.02437 -14.97236 3.07664  
C -0.13125 -12.39409 1.38187  
H 0.55741 -13.11798 0.93327  
H 0.39150 -11.93967 2.32395  
C -2.18192 -10.6

H -1.73305 -15.44306 -3.28777  
C -1.21899 -15.94478 -0.67720  
H -0.94765 -16.70966 -1.42358  
H -0.35833 -15.83015 -0.00805  
C -2.46506 -16.39307 0.07815  
H -2.26007 -17.31992 0.63664  
H -3.26351 -16.61742 -0.63958  
C -0.23134 -13.88218 -1.65264  
H 0.47880 -14.03712 -0.83191  
H 0.24235 -14.27768 -2.56684  
H -1.52789 -9.90645 -1.68865  
O -4.19463 -13.12304 -0.81063  
O -4.13524 -12.48632 0.51218

47

<sup>1</sup>C<sup>+</sup> Side-on (6)

Cr -2.80573 -13.33966 0.04067  
C -4.42582 -15.93111 1.44718  
H -4.47476 -16.93346 1.91180  
H -5.03347 -15.94113 0.53406  
H -4.85726 -15.20286 2.14496  
N -1.24117 -11.65172 -0.83110  
N -3.04072 -15.53792 1.11600  
N -1.43744 -13.11823 1.75515  
C -0.48586 -11.23573 0.37306  
H -1.08027 -10.45590 0.86932  
H 0.48169 -10.77253 0.10089  
C -2.19139 -12.35059 2.78195  
H -3.12682 -12.86465 3.02928  
H -2.43869 -11.35534 2.39673  
H -1.58897 -12.24012 3.69960  
C -1.06256 -14.46045 2.28719  
H -0.63209 -14.36038 3.29947  
H -0.26471 -14.85161 1.64783  
C -2.23704 -15.44095 2.35867  
H -1.84042 -16.42938 2.65687  
H -2.91969 -15.12559 3.15855  
C -0.20761 -12.36646 1.36271  
H 0.50009 -13.08399 0.93524  
H 0.27809 -11.94174 2.25826  
H -1.87873 -10.47022 -1.44715  
H -2.50129 -10.78725 -2.29278  
H -2.52214 -9.97537 -0.70907  
N -1.56740 -14.57472 -1.29329  
C -0.43839 -12.37839 -1.84418  
H -0.93711 -12.23357 -2.81129  
H 0.57198 -11.93994 -1.94620  
C -2.35665 -14.73843 -2.54399  
H -3.29898 -15.25398 -2.32779  
H -2.59473 -13.75892 -2.97349  
H -1.78827 -15.32595 -3.28485  
C -1.29975 -15.91328 -0.68327  
H -1.02848 -16.63897 -1.46916  
H -0.44228 -15.81690 -0.03428  
C -2.49185 -16.46542 0.10009  
H -2.18747 -17.42647 0.55693  
H -3.30858 -16.69300 -0.59849  
C -0.27910 -13.88027 -1.58414  
H 0.38685 -14.06255 -0.73399  
H 0.20616 -14.33491 -2.46588  
H -1.13640 -9.73672 -1.81290  
O -4.62442 -12.92719 -0.81283  
O -4.56565 -12.34715 0.38422

47

<sup>1</sup>C<sup>+</sup> End-on (2)

Cr -2.55261 -13.45933 0.07763  
C -4.39995 -15.58826 1.27978  
H -4.56876 -16.57265 1.74549  
H -4.96134 -15.53352 0.34084  
H -4.75812 -14.80198 1.95220  
N -1.34846 -11.89510 -0.78665  
N -2.95173 -15.37730 0.99851  
N -1.39170 -13.13929 1.77763  
C -0.61397 -11.28049 0.36843  
H -1.30021 -10.56356 0.83673  
H 0.26286 -10.71525 0.01389  
C -2.20727 -12.39208 2.7532  
C -3.02524 -13.02426 3.13371  
H -2.65614 -11.50732 2.30754  
H -1.57882 -12.09408 3.62904  
C -0.99640 -14.47907 2.30842  
H -0.59555 -14.39333 3.33189  
H -0.18423 -14.85691 1.67628  
C -2.19257 -15.42326 2.30047  
H -1.86231 -16.44998 2.51950  
H -2.89339 -15.13682 3.09293  
C -0.19590 -12.33210 1.38048  
H 0.55048 -13.01557 0.95764  
H 0.26042 -11.85412 2.26186  
C -2.16947 -10.83361 -1.43434  
H -2.68900 -11.26086 -2.29955

H -2.91951 -10.47487 -0.71782  
N -1.46979 -14.66101 -1.32729  
C -0.41542 -12.48182 -1.81392  
H -0.86857 -12.31202 -2.79730  
H 0.54519 -11.94525 -1.80996  
C -2.28588 -14.77584 -2.56731  
H -3.24448 -15.25523 -2.34210  
H -2.48929 -13.78193 -2.97933  
H -1.75291 -15.37601 -3.32257  
C -1.25218 -16.00994 -0.72063  
H -1.00539 -16.75408 -1.49516  
H -0.38731 -15.94328 -0.04917  
C -2.49896 -16.43544 0.03668  
H -2.32242 -17.38787 0.56192  
H -3.32315 -16.60175 -0.66891  
C -0.17823 -13.97198 -1.60535  
H 0.48395 -14.15479 -0.75063  
H 0.31480 -14.39903 -2.49492  
H -1.53201 -10.00059 -1.77189  
O -4.54358 -11.37643 0.57802  
O -4.03088 -12.59184 0.21848

47

<sup>1</sup>C<sup>+</sup> End-on (4)

Cr -2.60079 -13.41208 0.06379  
C -4.44105 -15.65224 1.29163  
H -4.56555 -16.63367 1.77689  
H -5.01231 -15.64001 0.35703  
H -4.82731 -14.86756 1.95022  
N -1.36177 -11.85922 -0.81719  
N -3.00792 -15.38427 0.99417  
N -1.35801 -13.13921 1.79608  
C -0.62864 -11.27504 0.35703  
H -1.31883 -10.57357 0.84268  
H 0.23945 -10.69485 0.00590  
C -2.15484 -12.37996 2.79868  
H -2.93067 -13.02490 3.22123  
H -2.65939 -11.52964 3.23034  
H -1.50000 -12.02499 3.60997  
C -1.00522 -14.49282 2.29686  
H -0.60737 -14.44620 3.32455  
H -0.20282 -14.88215 1.66084  
C -2.23281 -15.40576 2.28575  
H -1.92449 -16.43616 2.52204  
H -2.92517 -15.09222 3.07551  
C -0.18256 -12.33679 1.35587  
H 0.55596 -13.01698 0.91608  
H 0.29898 -11.84843 2.21851  
C -2.14998 -10.77685 -1.46818  
H -2.62205 -11.17285 -2.37473  
H -2.93618 -10.45975 -0.76827  
N -1.44782 -14.66365 -1.32427  
C -0.42198 -12.47175 -1.82367  
H -0.87250 -12.32433 -2.81162  
H 0.53431 -11.92739 -1.82593  
C -2.24870 -14.78969 -2.57173  
H -3.20655 -15.27518 -2.35698  
H -2.45774 -13.80058 -2.99319  
H -1.70208 -15.38869 -3.31895  
C -1.25137 -16.00150 -0.70150  
H -0.99796 -16.75816 -1.46236  
H -0.39807 -15.93800 -0.01596  
C -2.51826 -16.42481 0.03210  
H -2.34726 -17.37792 0.55852  
H -3.32525 -16.59763 -0.69186  
C -0.16818 -13.96062 -1.59272  
H 0.49119 -14.12977 -0.73398  
H 0.34050 -14.38097 -2.47705  
H -1.50180 -9.92954 -1.74235  
O -4.41811 -11.35906 0.58018  
O -4.21695 -12.71371 0.36657

47

<sup>1</sup>C<sup>+</sup> End-on (6)

Cr -2.63854 -13.49275 -0.04135  
C -4.46225 -15.66613 1.19652  
H -4.58670 -16.63046 1.71528  
H -5.00332 -15.69991 0.24432  
H -4.87983 -14.86389 1.81410  
N -1.41431 -11.87440 -0.85479  
N -3.02224 -15.38636 0.93452  
C -0.99640 -14.47907 2.30842  
C -0.70386 -11.28295 0.33160  
H -1.41932 -10.59934 0.80619  
H 0.15150 -10.67965 -0.01614  
C -2.03997 -12.34132 2.99811  
H -2.93775 -12.87702 3.32529  
H -2.35864 -11.35365 2.64828  
H -1.35706 -12.22365 3.85874  
C -1.05420 -14.46174 2.30758  
H 0.65247 -14.50331 3.33723  
H -0.26010 -14.83634 1.65139

C -2.29315 -15.36088 2.25669  
H -2.01260 -16.38812 2.53911  
H -3.01589 -15.01156 3.00418  
C -0.23213 -12.30761 1.36384  
H 0.48889 -13.00855 0.92664  
H 0.30385 -11.76867 2.16564  
C -2.16826 -10.78070 -1.52991  
H -2.70428 -11.18967 -2.39396  
H -2.89280 -10.36712 -0.82024  
N -1.45183 -14.69561 -1.37806  
C -0.46050 -12.47718 -1.85166  
H -0.91217 -12.35013 -2.84262  
H 0.48671 -11.91532 -1.85918  
C -2.18267 -14.88851 -2.66078  
H -3.12777 -15.41078 -2.47927  
H -2.41281 -13.92019 -3.11731  
H -1.57051 -15.48107 -3.36156  
C -1.22791 -16.01268 -0.71246  
H -0.94173 -16.78071 -1.44959  
H -0.38794 -15.90577 -0.01662  
C -2.49308 -16.44813 0.01486  
H -2.30899 -17.38038 0.57319  
H -3.28438 -16.65888 -0.71600  
C -0.17988 -13.95731 -1.60862  
H -4.56768 -14.10738 -0.72998  
H 0.36420 -14.37156 -2.47438  
H -1.48477 -9.98726 -1.87524  
O -4.22357 -11.27946 0.84980  
O -4.30864 -12.61029 0.73078

45

<sup>1</sup>Mn No O<sub>2</sub> (1)

Mn -2.14549 -13.57282 0.15785  
C -4.26667 -15.45020 1.13013  
H -4.55884 -16.40445 1.60278  
H -4.71205 -15.39169 0.13054  
H -6.44938 -14.61797 1.73146  
N -1.21386 -11.91925 -0.65985  
N -2.78506 -15.33777 1.02047  
N -1.29630 -13.07736 1.95263  
C -0.34323 -11.35702 0.43417  
H -0.88712 -10.50941 0.87145  
H 0.59963 -10.95719 0.02635  
C -2.06732 -12.24330 2.91292  
H -3.00872 -12.74179 3.16901  
H -2.30975 -11.27889 2.45311  
H -1.48761 -12.06789 3.83665  
C -0.99119 -14.42337 2.53660  
H -0.69996 -14.32827 3.60057  
H -0.13145 -14.82824 1.98879  
C -2.19619 -15.35236 2.40692  
H -1.91375 -16.37419 2.70840  
H -2.98715 -15.02387 3.09364  
C -0.04241 -12.38099 1.52644  
H 0.65123 -13.14700 1.15901  
H 0.44436 -11.87477 2.38085  
C -2.15221 -10.85431 -1.11391  
H -2.82557 -11.25974 -1.87751  
H -2.75503 -10.51495 -0.26406  
N -1.43524 -14.67557 -1.41764  
H -0.40256 -12.43128 -1.85298  
H -1.06425 -12.22045 -2.73779  
H 0.49907 -11.88660 -1.98163  
C -2.28246 -14.88220 -2.61787  
H -3.21919 -15.37481 -2.33468  
H -2.53330 -13.91585 -0.06919  
H -1.75896 -15.50486 -3.36521  
C -1.11574 -15.97982 -0.75339  
H -0.88484 -16.76180 -1.50061  
H -0.21692 -15.82831 -0.14393  
C -2.27936 -16.43714 0.12356  
H -1.97874 -17.32190 0.70822  
H -3.12044 -16.74487 0.51042  
C -0.18069 -13.93210 -1.77174  
H 0.56635 -14.14796 -0.99840  
H 0.23156 -14.28424 -2.73562  
H -1.60177 -9.99447 -1.53484

45

<sup>1</sup>Mn No O<sub>2</sub> (3)

Mn -2.12053 -13.58235 0.16149  
C -4.25098 -15.43290 1.12489  
H -4.55497 -16.38341 1.59757  
H -4.69239 -15.36983 1.12387  
H -4.62601 -14.59571 1.72410  
N -1.19991 -11.92943 -0.65610  
N -2.76711 -15.33985 1.02115  
N -1.30392 -13.06903 1.96624  
C -0.33355 -11.35720 0.43774  
H -0.87500 -10.50050 0.85964  
H 0.61513 -10.96960 0.03215  
C -2.08815 -12.23648 2.91312

H -3.02684 -12.74207 3.16587  
H -2.33594 -11.27666 2.44629  
H -1.51684 -12.05065 3.83955  
C -0.99218 -14.41296 2.55180  
H -0.71153 -14.32675 3.61837  
H -0.12422 -14.80968 2.01115  
C -2.18362 -15.35802 2.41119  
H -1.88627 -16.37783 2.70439  
H -2.98209 -15.04795 3.09776  
C -0.04689 -12.37032 1.54402  
H 0.65203 -13.13775 1.19010  
H 0.42762 -11.85633 2.40092  
C -2.15381 -10.87610 -1.10659  
H -2.82623 -11.28942 -1.86668  
H -2.75689 -10.54220 -0.25485  
N -1.44063 -14.67813 -1.43003  
C -0.43760 -12.43583 -1.85393  
H -1.04401 -12.20527 -2.73887  
H 0.51951 -11.90215 -1.97077  
C -2.30190 -14.87460 -2.62369  
H -3.23995 -15.36128 -2.33407  
H -2.54864 -13.90471 -3.06993  
H -1.78989 -15.49837 -3.37744  
C -1.12117 -15.98658 -0.77203  
H -0.90235 -16.76669 -1.52514  
H -0.21452 -15.83878 -0.17320  
C -2.27192 -16.44359 0.12201  
H -1.96032 -17.32456 0.70630  
H -3.12129 -16.75653 -0.49838  
C -0.18495 -13.94061 -1.78791  
H 0.56375 -14.16794 -1.01958  
H 0.21737 -14.29024 -2.75712  
H -1.61396 -10.01114 -1.53053

45

<sup>1</sup>Mn No O<sub>2</sub> (5)

Mn -2.45662 -13.44869 0.11344  
C -4.37689 -15.68237 1.22323  
H -4.51949 -16.67464 1.68661  
H -4.87716 -15.66608 0.24863  
H -4.83462 -14.91829 1.86121  
N -1.27965 -11.79372 -0.71347  
N -2.93013 -15.37804 1.04284  
N -1.26905 -13.07761 1.98150  
C -0.40261 -11.33508 0.41327  
H -0.94222 -10.52470 0.92123  
H 0.53070 -10.90058 0.01693  
C -1.93040 -12.25001 3.01113  
H -2.86720 -12.72232 3.32969  
H -2.17954 -11.26497 2.59897  
H -1.27856 -12.11564 3.89248  
C -1.01702 -14.58337 2.46244  
H -0.65676 -14.45878 3.50715  
H -0.21431 -14.88804 1.85180  
C -2.27712 -15.32759 2.39136  
H -2.03186 -16.34692 2.73458  
H -3.02661 -14.92813 3.08695  
C -0.05532 -12.41834 1.44070  
H 0.57712 -13.19164 0.99027  
H 0.53954 -11.95064 2.24621  
C -2.05445 -10.62773 -1.22102  
H -2.74295 -10.96012 -2.00592  
H -2.64186 -10.19661 -0.40286  
N -1.40047 -14.69374 -1.42980  
C -0.51579 -12.39480 -1.85530  
H -1.13722 -12.26042 -2.75033  
H 0.41864 -11.83339 -2.02559  
C -2.16317 -14.96735 -2.66556  
H -3.10185 -15.48081 -2.42591  
H -2.42102 -14.02639 -3.16557  
H -1.57996 -15.59539 -3.36221  
C -1.11634 -15.93700 -0.67261  
H -0.81380 -16.75708 -1.34905  
H -0.26334 -15.74391 -0.01133  
C -2.33307 -16.40984 0.13232  
H -2.05589 -17.30975 0.70685  
H -3.12643 -16.70781 -0.56449  
C -0.18648 -13.88474 -1.70262  
H 0.52487 -14.04684 -0.88346  
H 0.31641 -14.22035 -2.62755  
H -1.38362 -9.85273 -1.63226

45

<sup>1</sup>Mn No O<sub>2</sub> (7)

Mn -2.75897 -13.33768 0.06414  
C -4.34788 -15.77368 1.43134  
H -4.44881 -16.77440 1.88739  
H -4.94516 -15.73858 0.51200  
H -4.74269 -15.02372 2.12745  
N -1.21016 -11.73667 -0.77544  
N -2.93440 -15.46031 1.11376  
N -1.32319 -13.10170 1.84914

C -0.45931 -11.24738 0.41083  
H -1.09125 -10.49250 0.89840  
H 0.47163 -10.73775 0.10449  
C -2.05050 -12.35095 2.90148  
H -2.98517 -12.86295 3.15767  
H -2.30656 -11.34967 2.53699  
H -1.42953 -12.25660 3.80974  
C -0.95066 -14.45750 2.33258  
H -0.51188 -14.40319 3.34539  
H -0.16343 -14.83838 1.67303  
C -2.13965 -15.41780 2.37269  
H -1.77367 -16.42453 2.63963  
H -2.82339 -15.10995 3.17385  
C -0.11709 -12.34411 1.41416  
H 0.59099 -13.05640 0.97685  
H 0.38936 -11.88846 2.28291  
C -1.92630 -10.59999 -1.40062  
H -2.54450 -10.96652 -2.22913  
H -2.58712 -10.13328 -0.65968  
H -1.45515 -14.62784 -1.31671  
C -0.36444 -12.41602 -1.79607  
H -0.85024 -12.26413 -2.76814  
H 0.62871 -11.93868 -1.86338  
C -2.20588 -14.79973 -2.58516  
H -3.15536 -15.31246 -2.39318  
H -2.43790 -13.82285 -3.02492  
H -1.61615 -15.83968 -3.30875  
C -1.21685 -15.95038 -0.67251  
H -0.95701 -16.70876 -1.43133  
H -0.34535 -15.85706 -0.01395  
C -2.43373 -14.73654 0.11051  
H -2.18994 -17.40186 0.58946  
H -3.26023 -16.62726 -0.58756  
C -0.17230 -13.91503 -1.55810  
H 0.47111 -14.09251 -0.68921  
H 0.35164 -14.34389 -2.43101  
H -1.22521 -9.83863 -1.78616

47

<sup>1</sup>Mn Side-on (1)

Mn -2.46379 -13.44432 0.11681  
C -4.32225 -15.47874 1.40750  
H -4.49534 -16.46923 1.85716  
H -4.91529 -15.37012 0.49502  
H -4.62511 -14.69884 2.11415  
N -1.28768 -11.88055 -0.73070  
N -2.88185 -15.30444 1.07086  
N -1.27713 -13.13374 1.82177  
C -0.55754 -11.25715 0.41862  
H -1.25533 -10.56135 0.90001  
H 0.29899 -10.66644 0.05596  
C -2.06317 -12.41126 2.86129  
H -2.97854 -12.96134 3.09710  
H -2.35152 -11.42414 2.48873  
H -1.45818 -12.29780 3.77502  
C -0.86631 -14.47331 2.32614  
H -0.43633 -14.40361 3.33990  
H -0.07586 -14.84919 1.66630  
C -2.07446 -15.39896 2.34321  
H -1.7600

H -4.50988 -16.45642 1.83827  
H -4.90809 -15.35265 0.47210  
H -4.62792 -14.68360 2.09313  
N -1.29016 -11.88159 -0.72602  
N -2.88159 -15.30267 1.06558  
N -1.26794 -13.13364 1.81953  
C -0.55099 -11.25725 0.41834  
H -1.24514 -10.56014 0.90285  
H 0.30375 -10.66795 0.04959  
C -2.06015 -12.40031 2.85281  
H -2.97818 -12.95600 3.08275  
H -2.34392 -11.42089 2.47780  
H -1.45952 -12.29580 3.76931  
C -0.86591 -14.47536 2.32686  
H -0.43800 -14.40572 3.34116  
H -0.07564 -14.85718 1.66993  
C -2.08051 -15.39393 2.34245  
H -1.77204 -16.43374 2.52652  
H -2.74673 -15.10813 3.16408  
C -0.09153 -12.30461 1.41775  
H 0.66655 -12.96798 0.98438  
H 0.36344 -11.81964 2.29603  
C -2.11936 -10.83402 -1.38307  
H -2.67838 -11.28558 -2.20907  
H -2.83348 -10.43770 -0.65533  
N -1.40948 -14.63121 -1.26337  
C -0.34935 -12.46728 -1.75158  
H -0.80184 -12.30617 -2.73654  
H 0.60635 -11.92259 -1.74616  
C -2.20366 -14.73421 -2.52045  
H -3.15035 -15.24265 -2.31821  
H -2.43512 -13.73757 -2.90610  
H -1.63472 -15.99986 -3.27533  
C -1.23003 -15.99141 -0.67124  
H -1.01791 -16.73504 -1.45578  
H -0.35902 -15.96760 -0.00499  
C -2.49224 -16.36785 0.08493  
H -2.36314 -17.33454 0.59759  
H -3.33003 -16.47764 -0.61510  
C -0.10899 -13.95483 -1.52994  
H 0.54330 -14.13315 -0.66691  
H 0.39180 -14.38871 -2.41148  
H -1.48069 -10.02429 -1.76993  
O -3.94602 -12.38593 0.47406  
O -4.13267 -13.27014 -0.67925

47  
**I<sup>Mn</sup> Side-on (5)**  
Mn -2.61226 -13.34418 0.10156  
C -4.37156 -15.68299 1.40808  
H -4.51911 -16.67789 1.86247  
H -4.94003 -15.62843 0.47280  
H -4.75587 -14.91725 2.09141  
N -1.18237 -11.70984 -0.76085  
N -2.94139 -15.41847 1.12563  
N -1.31684 -13.08594 1.82553  
C -0.39563 -11.24030 0.40925  
H -0.99021 -10.46072 0.90400  
H 0.55078 -10.77002 0.08985  
C -2.05096 -12.30219 2.85745  
H -2.99026 -12.80194 3.11452  
H -2.29022 -11.30730 2.46841  
H -1.43154 -12.19988 3.76287  
C -0.96507 -14.43825 2.35196  
H -0.53869 -14.35173 3.36568  
H -0.17422 -14.84270 1.71157  
C -2.16937 -15.37839 2.39731  
H -1.82170 -16.38627 2.68167  
H -2.85899 -15.04849 3.18423  
C -0.08385 -12.35114 1.40715  
H 0.60962 -13.07902 0.97312  
H 0.41762 -11.92002 2.28917  
C -1.92558 -10.57266 -1.35119  
H -2.57101 -10.93877 -2.15763  
H -2.55928 -10.11633 -0.58217  
N -1.47725 -14.57818 -1.27604  
C -0.37232 -12.38732 -1.80987  
H -0.88892 -12.23282 -2.76530  
H 0.62170 -11.91846 -1.90878  
C -2.27444 -14.74216 -2.52411  
C -3.22482 -15.23666 -2.99888  
H -2.49820 -13.76357 -2.96063  
H -1.71251 -15.34706 -3.25367  
C -1.22660 -15.91345 -0.64935  
H -0.97039 -16.65300 -1.42544  
H -0.34900 -15.82134 0.00081  
C -2.43710 -16.40818 0.13844  
H -2.17911 -17.36335 0.62875  
H -3.26162 -16.61733 -0.55575  
C -0.18688 -13.88679 -1.57192  
H 0.48659 -14.07257 -0.72759  
H 0.28826 -14.33472 -2.46083

H -1.24300 -9.80586 -1.75659  
O -4.14596 -12.39160 0.52786  
O -4.22384 -13.02702 -0.76317

47  
**I<sup>Mn</sup> Side-on (7)**  
Mn -2.61339 -13.34668 0.09593  
C -4.37665 -15.66184 1.34664  
H -4.51633 -16.64997 1.81784  
H -4.92921 -15.64186 0.40036  
H -4.78722 -14.89266 2.01099  
N -1.21767 -11.74374 -0.74682  
N -2.94144 -15.38023 1.08778  
N -1.28290 -13.05446 1.92453  
C -0.40809 -11.26433 0.41209  
H -0.99594 -10.48052 0.90844  
H 0.52726 -10.79402 0.06273  
C -1.94508 -12.26676 2.98890  
H -2.87826 -12.75220 3.29538  
H -2.19132 -11.26592 2.61719  
H -1.28566 -12.16962 3.86914  
C -0.97550 -14.43196 2.39227  
H -0.55784 -14.41775 3.41484  
H -0.19367 -14.83864 1.74142  
C -2.20715 -15.33953 2.38834  
H -1.90045 -16.35545 2.68991  
H -2.91896 -14.98591 3.14525  
C -0.06728 -12.35495 1.42731  
H 0.59540 -13.10296 0.97900  
H 0.49250 -11.89737 2.26165  
C -1.95999 -10.59612 -1.32695  
H -2.61302 -10.95095 -2.13273  
H -2.57925 -10.31161 -0.55095  
H -1.43654 -14.63876 -1.36515  
C -0.40807 -12.39739 -1.81978  
H -0.94753 -12.24434 -2.76309  
H 0.56845 -11.89562 -1.92783  
C -2.18851 -14.85142 -2.62390  
H -3.13944 -15.35478 -2.41586  
H -2.41385 -13.88990 -3.09899  
H -1.60496 -15.46933 -3.32862  
C -1.19236 -15.93129 -0.66899  
H -0.92708 -16.72170 -1.39271  
H -0.32405 -15.80537 -0.01150  
C -2.41307 -16.39469 0.12863  
H -2.16137 -17.33191 0.65460  
H -3.22977 -16.62748 -0.56702  
C -0.17245 -13.89705 -1.61584  
H 0.49340 -14.07549 -0.76340  
H 0.34484 -14.29167 -2.50830  
H -1.27406 -9.83443 -1.73616  
O -4.44325 -12.23250 0.55510  
O -4.55659 -12.81943 -0.65990

47  
**I<sup>Mn</sup> End-on (1)**  
Mn -2.50029 -13.48710 0.08705  
C -4.40205 -15.54929 1.26820  
H -4.58255 -16.53090 1.73487  
H -4.96573 -15.48824 3.33093  
H -4.74664 -14.75652 1.93968  
N -1.36916 -11.92440 -0.78262  
N -2.95280 -15.35968 0.98310  
H -1.39796 -13.13837 1.76402  
C -0.66239 -11.27210 0.36740  
H -1.37549 -10.57987 0.83221  
H 0.19330 -10.67742 0.00970  
C -2.21211 -12.41028 2.77833  
H -3.00618 -13.06194 3.15460  
H -2.69427 -11.54191 2.31289  
H -1.57218 -12.09716 3.61738  
C -0.98933 -14.47839 2.28442  
H -0.58282 -14.39339 3.30552  
H -0.18062 -14.85131 1.64503  
C -2.18609 -15.42106 2.28049  
H -1.85786 -16.45081 2.48616  
H -2.88037 -15.14042 3.08029  
C -0.21441 -12.31068 1.37627  
H 0.54643 -12.97749 0.95287  
H 0.22669 -11.82539 2.26104  
C -2.19497 -10.88870 -1.46561  
H -2.70215 -11.34272 -2.32488  
H -2.95140 -10.51928 -0.76232  
N -1.45503 -14.65469 -1.30799  
C -0.39876 -12.49299 -1.79129  
H -0.82366 -12.31585 -2.78578  
H 0.55473 -11.94601 -1.75298  
C -2.28253 -14.74669 -2.54385  
H -3.25472 -15.19462 -2.31234  
H -2.45561 -13.74860 -2.95811  
H -1.77372 -15.36678 -3.29956  
C -1.25748 -16.01502 -0.72142

H -1.01828 -16.75114 -1.50586  
H -0.39594 -15.97029 -0.04408  
C -2.51655 -16.42550 0.02136  
H -2.36315 -17.38163 0.54625  
H -3.33896 -16.57411 -0.69023  
C -0.15911 -13.98165 -1.58989  
H 0.50338 -14.17186 -0.73727  
H 0.32703 -14.40813 -2.48399  
H -1.56023 -10.06054 -1.82004  
O -4.35593 -11.36681 0.66885  
O -3.95737 -12.62339 0.29770

47  
**I<sup>Mn</sup> End-on (3)**  
Mn -2.50989 -13.43979 0.07745  
C -4.41820 -15.56779 1.25961  
H -4.58097 -16.54667 1.73859  
H -4.98078 -15.52933 0.32064  
H -4.78065 -14.77248 1.91821  
N -1.35957 -11.89634 -0.78743  
N -2.97398 -15.35334 0.97471  
N -1.36305 -13.14228 1.76725  
C -0.62845 -11.27117 0.36651  
H -1.32706 -10.57404 0.84587  
H 0.23023 -10.68424 0.00430  
C -2.18562 -12.39186 2.75732  
H -2.94373 -13.05267 3.18625  
H -2.71269 -11.56430 2.26326  
H -1.54170 -12.00852 3.56359  
C -0.99161 -14.48697 2.28831  
H -0.59934 -14.41831 3.31530  
H -0.18375 -14.87509 1.65738  
C -2.21121 -15.40422 2.27362  
H -1.90258 -16.43710 2.49644  
H -2.90638 -15.10167 0.06480  
C -0.17881 -12.32453 1.36572  
H 0.57826 -12.99523 0.93241  
H 0.27852 -11.84367 2.24489  
C -2.18966 -10.84967 -1.44473  
H -2.66443 -11.27583 -2.33594  
H -2.97371 -10.53995 -0.73938  
N -1.44680 -14.66170 -1.29892  
C -0.40949 -12.48573 -1.80051  
H -0.85216 -12.32457 -2.78955  
H 0.54461 -11.93878 -1.78642  
C -2.27748 -14.75122 -2.53148  
H -3.23740 -15.22552 -2.30394  
H -2.47715 -13.75118 -2.92862  
H -1.75566 -15.34600 -3.29894  
C -1.25210 -16.01614 -0.70907  
H -1.01105 -16.75715 -1.48844  
H -0.39417 -15.97126 -0.02728  
C -2.51975 -16.42094 0.02535  
H -2.68009 -17.37255 0.55952  
H -3.33266 -16.57981 -0.69472  
C -0.15977 -13.97433 -1.58224  
H 0.50714 -14.15257 -0.73058  
H 0.33056 -14.40097 -2.47344  
H -1.56851 -9.99027 -1.74329  
O -4.38278 -11.44640 0.62840  
O -4.10938 -12.75698 0.30574

45  
**I<sup>Fe</sup> No O<sub>2</sub> (2)**  
Fe -2.17877 -13.58302 1.03449  
C -3.35520 -15.35875 1.07527  
H -4.68405 -16.30098 1.55003  
H -4.78903 -15.29194 0.07094  
H -4.71715 -14.51216 1.66972  
N -1.31217 -11.94749 -0.67925  
N -2.86868 -15.28549 0.97590  
N -1.38110 -13.07696 1.90290  
C -0.43882 -11.35583 0.39915  
H -0.98512 -10.50664 0.83044  
H 0.49762 -10.95533 -0.02098  
C -2.19130 -12.23697 2.82373  
H -3.13007 -12.74553 3.06818  
H -2.43544 -11.28386 2.34262  
H -1.63599 -12.03726 3.75698  
C -1.08554 -14.40942 2.51001  
H -0.81437 -14.31042 3.57889  
H -0.21935 -14.82571 1.98179  
C -2.29596 -15.32685 2.37082  
H -2.02527 -16.35480 2.65949  
H -0.73878 -15.00040 3.05766  
C -0.12965 -12.37018 1.49508  
H 0.57619 -13.12918 1.13763  
H 0.33577 -11.85475 2.35730  
C -2.27130 -10.89881 -1.13360  
H -2.94315 -11.32304 -1.88847  
H -2.87230 -10.56549 -0.27994  
N -1.52248 -14.66216 -1.42312

C -0.53867 -12.43734 -1.87763  
H -1.14373 -12.21791 -2.76641  
H 0.40949 -11.88819 -1.99018  
C -2.41109 -14.83198 -2.60148  
H -3.35045 -15.30743 -2.29927  
H -2.64914 -13.85530 -3.03640  
H -1.92198 -15.45736 -3.36900  
C -1.22162 -15.97914 -0.78362  
H -1.01862 -16.75591 -1.54599  
H -0.31376 -15.85427 -0.18199  
C -2.39055 -16.41232 0.09499  
H -2.10586 -17.29252 0.69298  
H -3.23683 -16.71527 -0.53469  
C -0.26952 -13.93657 -1.79998  
H 0.48490 -14.15579 -1.03542  
H 0.12179 -14.29447 -2.77185  
H -1.74489 -10.02864 -1.56612

45  
**I<sup>Fe</sup> No O<sub>2</sub> (4)**  
Fe -2.45826 -13.47027 0.09330  
C -4.46346 -15.53029 1.14750  
H -4.67861 -16.50730 1.61706  
H -4.94248 -15.49677 0.16252  
H -4.88634 -14.73471 1.77115  
N -1.37787 -11.84049 -0.72584  
N -2.99989 -15.31251 0.99375  
N -1.34569 -13.08288 1.92471  
C -0.49612 -11.34018 0.37911  
H -1.04416 -10.53173 0.88110  
H 0.42727 -10.99631 -0.03173  
C -2.05381 -12.24921 2.91519  
H -2.99536 -12.72897 3.20705  
H -2.29886 -11.27395 2.47855  
H -1.43813 -12.09143 3.81952  
C -1.09846 -14.44873 2.43895  
H -0.75690 -14.43530 3.49145  
H -0.28997 -14.89283 1.84589  
C -2.36800 -15.30118 2.35300  
H -2.14244 -16.32906 2.68591  
H -3.11786 -14.89789 3.04576  
C -0.13106 -12.40902 1.41387  
H 0.51816 -13.17348 0.97158  
H 0.44425 -11.92641 2.22675  
C -2.21546 -10.71369 -1.21731  
H -2.89727 -11.07644 -1.99481  
H -2.80970 -10.31439 -0.38777  
N -1.48323 -14.68092 -1.43080  
C -0.60362 -12.40592 -1.87842  
H -1.22607 -12.27131 -2.77252  
H 0.32493 -11.83179 -2.04195  
C -2.28451 -14.92004 -2.64719  
H -3.22489 -15.42073 -2.38882  
H -2.53876 -13.96671 -3.12491  
H -1.73404 -15.54754 -3.37187  
C -1.21419 -15.94088 -0.70185  
H -0.93482 -16.76116 -1.39012  
H -0.35698 -15.77195 -0.03927  
C -2.44340 -16.38050 0.10021  
H -2.19647 -17.28494 0.68251  
H -3.24418 -16.65695 -0.59705  
C -0.26558 -13.89317 -1.73119  
H 0.45585 -14.05403 -0.92037  
H 0.22050 -14.23368 -2.66500  
H -1.59310 -9.90222 -1.63600

45  
**I<sup>Fe</sup> No O<sub>2</sub> (6)**  
Fe -2.73915 -13.36017 0.04926  
C -4.46423 -15.70730 1.23069  
H -4.61656 -16.69225 1.70508  
H -4.97257 -15.69434 0.25914  
H -4.90948 -14.93022 1.86350  
N -1.30998 -11.75186 -0.76307  
N -3.02186 -15.41884 1.03696  
N -1.41371 -13.09113 1.82177  
C -0.45464 -11.30539 0.37326  
H -0.98976 -10.48982 0.87735  
H 0.49699 -10.88546 0.00566  
C -2.11969 -12.26208 2.82970  
H -3.06219 -12.74064 3.11759  
H -2.35995 -11.28040 2.40638  
H -1.49180 -12.12530 3.72744  
C -1.11935 -14.44244 2.37019  
H -0.73878 -14.36897 3.40294  
H -0.31873 -14.87984 1.76448  
C -2.35084 -15.34015 2.36545  
H -2.06838 -16.34635 2.71887  
H -3.09101 -14.95076 3.07592  
C -0.16469 -12.41583 1.37684  
H 0.48789 -13.17646 0.93599  
H 0.37869 -11.98959 2.23851

C -2.07782 -10.59615 -1.28709  
H -2.76958 -10.94137 -2.06500  
H -2.66500 -10.15047 -0.47532  
N -1.54371 -14.61973 -1.34480  
C -0.55697 -12.39051 -1.88015  
H -1.15767 -12.25418 -2.78845  
H 0.40180 -11.87179 -2.05065  
C -2.34642 -14.85067 -2.57194  
H -3.29206 -15.34255 -2.31715  
H -2.58880 -13.89451 -3.04877  
H -1.79083 -15.48307 -3.28643  
C -1.23735 -15.91310 -0.67510  
H -0.94162 -16.67523 -1.41733  
H -0.37162 -15.75772 -0.02132  
C -2.43340 -16.43398 0.11671  
H -2.13696 -17.33980 0.67209  
H -3.22731 -16.73321 -0.57895  
C -0.29479 -13.87878 -1.67075  
H 0.41632 -14.04087 -0.85262  
H 0.17310 -14.28848 -2.58324  
H -1.40850 -9.82809 -1.71209

47  
**I<sup>Fe</sup> Side-on (2)**  
Fe -2.46032 -13.46830 0.09407  
C -4.45637 -15.51706 1.13154  
H -4.64641 -16.49388 1.60399  
H -4.93276 -15.45877 0.14629  
H -4.87669 -14.71604 1.74671  
N -1.39966 -11.85896 -0.70532  
N -2.99595 -15.28639 0.96966  
N -1.32476 -13.14937 1.78206  
C -0.48851 -11.34146 0.37847  
H -1.03268 -10.54942 0.90604  
H 0.40435 -10.87633 -0.06693  
C -2.08166 -12.30908 2.75606  
H -3.01201 -12.80776 3.03897  
H -2.34156 -11.34747 2.30612  
H -1.46644 -12.14172 3.65433  
C -1.06971 -14.48690 2.37838  
H -0.72673 -14.39738 3.42316  
H -0.26406 -14.96621 1.81259  
C -2.35829 -15.29690 2.33226  
H -2.17211 -16.33210 2.65764  
H -3.08820 -14.86839 3.02875  
C -0.09194 -12.43360 1.36112  
H 0.58939 -13.16198 0.90932  
H 0.42925 -11.98820 2.22528  
C -2.22458 -10.72688 -1.20426  
H -2.91510 -11.09780 -1.96762  
H -2.80972 -10.32062 -0.37292  
N -1.45624 -14.63204 -1.27757  
C -0.60622 -12.41391 -1.85712  
H -1.23234 -12.31387 -2.75132  
H 0.29617 -11.80562 -2.02368  
C -2.30558 -14.83893 -2.48771  
H -3.25095 -15.31351 -2.21269  
H -2.54089 -13.87809 -2.95224  
H -1.76993 -14.47556 -3.20976  
C -1.17937 -15.94523 -0.63745  
H -0.90199 -16.70549 -1.38675  
H -0.32492 -15.82570 0.03796  
C -2.43675 -16.38373 0.09990  
H -2.24450 -17.28453 0.70219  
H -3.21544 -16.64127 -0.62736  
C -0.23275 -13.87477 -1.65919  
H 0.51723 -14.01166 -0.87127  
H 0.20236 -14.27479 -2.59181  
H -1.58479 -9.93653 -1.62780  
O -0.06928 -12.62651 0.52911  
O -4.04589 -13.06064 -0.81466

47  
**I<sup>Fe</sup> Side-on (4)**  
Fe -2.66422 -13.38783 0.06120  
C -4.45503 -15.69717 1.25254  
H -4.61284 -16.68509 1.71755  
H -4.96828 -15.67006 0.28506  
H -3.21544

C -2.32151 -15.36329 2.36708  
H -2.03347 -16.37424 2.70103  
H -3.04627 -14.98263 3.09756  
C -0.15034 -12.42940 1.35842  
H 0.52674 -13.17085 0.92267  
H 0.36029 -12.00862 2.24120  
C -2.07225 -10.60828 -1.29893  
H -2.75309 -10.95918 -2.08237  
H -2.66749 -10.16982 -0.49041  
N -1.52082 -14.59368 -1.28409  
C -0.52873 -12.39296 -1.87410  
H -1.11907 -12.26870 -2.79057  
H 0.42867 -11.86956 -2.03602  
C -2.34471 -14.80466 -2.50820  
H -3.28627 -15.29732 -2.24693  
H -2.58655 -13.84253 -2.96995  
H -1.79514 -15.42866 -3.23175  
C -1.22495 -15.90890 -0.64910  
H -0.93610 -16.64835 -1.41494  
H -0.35934 -15.77936 0.00958  
C -2.43605 -16.42936 0.11890  
H -2.15913 -17.34937 0.66102  
H -3.22721 -16.70147 -0.59084  
C -0.26450 -13.87763 -1.64230  
H 0.45700 -14.03465 -0.83273  
H 0.17991 -14.31167 -2.55417  
H -1.40664 -9.83447 -1.71772  
O -4.20026 -12.46345 0.47060  
O -4.25486 -13.07528 -0.81051

47

<sup>1</sup>F<sup>e</sup> Side-on (6)

Fe -2.66922 -13.38785 0.06120  
C -4.44390 -15.59837 1.29280  
H -4.61310 -16.58354 1.75776  
H -4.98933 -15.54737 0.34454  
H -4.82370 -14.81433 1.95668  
N -1.32540 -11.80726 -0.76786  
N -2.99660 -15.37118 1.03781  
N -1.37585 -13.08490 1.86369  
C -0.53585 -11.27671 0.38409  
H -1.15704 -10.01358 0.87074  
H 0.37743 -10.77359 0.02609  
C -0.29220 -12.31052 2.90563  
H -3.02325 -12.81700 3.18045  
H -2.35020 -11.31775 2.52207  
H -1.46095 -12.19971 3.80319  
C -1.03970 -14.44963 2.34868  
H -0.62634 -14.41422 3.37167  
H -0.24816 -14.84680 1.70314  
C -2.26070 -15.36653 2.34032  
H -1.95087 -16.38888 2.61040  
H -2.96993 -15.03489 3.10860  
C -0.16631 -12.50888 1.40049  
H 0.52664 -13.07788 0.96212  
H 0.35841 -11.88250 2.25024  
C -2.12076 -10.69822 -1.35776  
H -2.75296 -11.09038 -2.16147  
H -2.76634 -10.26550 -0.58600  
H -1.51093 -14.65387 -1.37574  
C -0.48271 -12.43117 -1.83571  
H -1.00604 -12.27699 -2.78715  
H 0.48518 -11.91082 -1.91546  
C -2.27752 -14.83926 -2.63225  
H -3.23072 -15.33535 -2.42119  
H -2.50034 -13.86840 -0.88710  
H -1.70211 -15.45022 -3.34778  
C -1.27443 -15.96233 -3.70505  
H -1.01594 -16.73972 -1.44362  
H -0.40737 -15.85485 -0.04209  
C -2.50605 -16.40503 0.07835  
H -2.29142 -17.34995 0.60455  
H -3.32798 -16.60466 -0.62118  
C -0.23948 -13.92548 -1.62885  
H 0.42172 -14.10068 -0.77178  
H 0.27600 -14.33089 -2.51644  
H -1.46214 -9.91277 -1.76367  
O -4.28298 -12.40689 0.48906  
O -4.36388 -13.04181 -0.79973

47

<sup>1</sup>F<sup>e</sup> End-on (2)

Fe -2.46314 -13.48506 0.08285  
C -4.41953 -15.53372 1.25291  
H -4.59798 -16.50807 1.73526  
H -4.97797 -15.49018 0.31260  
H -4.77060 -14.72971 1.90747  
N -1.39049 -11.93194 -0.78273  
N -2.97359 -15.33944 0.96933  
N -1.37021 -13.14920 1.75379  
C -0.68109 -11.27442 0.36328  
H -1.40069 -10.59961 0.84232

H 0.15699 -10.66176 -0.00461  
C -2.18624 -12.41506 2.76225  
H -2.96557 -13.07028 3.16039  
H -2.68620 -11.55981 2.29115  
H -1.53912 -12.07839 3.58636  
C -0.98538 -14.49163 2.27208  
H -0.58367 -14.41772 3.29609  
H -0.18173 -14.87836 1.63534  
C -2.20623 -15.40607 2.26562  
H -1.90127 -16.44214 2.47630  
H -2.89453 -15.10766 3.06401  
C -0.19966 -12.31439 1.35745  
H 0.56332 -12.96960 0.92125  
H 0.24642 -11.82730 2.23872  
C -2.21887 -10.90317 -1.47022  
H -2.70723 -11.35752 -2.34018  
H -2.98880 -10.55464 -0.77001  
N -1.42477 -14.65149 -1.28202  
C -0.40310 -12.49188 -1.78595  
H -0.82465 -12.32468 -2.78319  
H 0.53858 -11.92593 -1.74249  
C -2.26840 -14.72986 -2.50867  
H -3.24171 -15.17030 -2.26976  
H -2.43859 -13.73009 -2.91877  
H -1.77196 -15.35117 -3.27192  
C -1.24811 -16.01298 -0.70419  
H -1.01190 -16.74968 -1.48931  
H -0.39371 -15.98460 -0.01746  
C -2.52615 -16.40896 0.01781  
H -2.38885 -17.36360 0.54994  
H -3.33587 -16.55739 -0.70780  
C -0.13813 -13.97686 -1.57844  
H 0.53499 -14.15798 -0.73249  
H 0.34320 -14.39925 -2.47720  
H -1.59028 -10.06438 -1.80986  
O -4.29944 -11.41423 0.65783  
O -3.98156 -12.70895 0.38141

47

<sup>1</sup>F<sup>e</sup> End-on (4)

Fe -2.56547 -13.48041 -0.00775  
C -4.42684 -15.57951 1.20843  
H -4.60333 -16.54802 1.70332  
H -4.96567 -15.56375 0.25435  
H -4.80548 -14.76971 1.84002  
N -1.37505 -11.90795 -0.83001  
N -2.97560 -15.37103 0.95859  
N -1.37324 -13.11911 1.84187  
C -0.67871 -11.29273 0.34438  
H -1.39913 -10.61188 0.81499  
H 0.17392 -10.68657 -0.00184  
C -2.12392 -12.37190 2.87509  
H -2.96871 -12.96951 3.23073  
H -2.53674 -11.45099 2.44817  
H -1.46583 -12.13244 3.72760  
C -1.01882 -14.47632 2.30953  
H -0.62214 -14.46265 3.34032  
H -0.21640 -14.85869 1.66751  
C -2.24495 -15.38888 2.27226  
H -1.94854 -16.41914 2.52323  
H -2.95934 -15.06527 3.03819  
C -0.21477 -12.32528 1.36649  
H 0.52689 -13.00829 0.93451  
H 0.28067 -11.80461 2.20383  
C -2.20521 -10.86427 -1.48860  
H -2.67940 -11.28828 -2.38152  
H -2.98605 -10.54718 -0.78332  
N -1.44985 -14.66347 -1.32153  
C -0.41308 -12.48688 -1.83260  
H -0.84603 -12.33062 -2.82709  
H 0.53925 -11.93636 -1.81041  
C -2.26418 -14.78145 -2.56318  
H -3.21226 -15.28351 -2.34457  
H -2.48884 -13.78909 -2.96825  
H -1.71619 -15.36207 -3.32286  
C -1.23454 -16.00803 -0.71240  
H -0.97414 -16.75053 -1.48377  
H -0.38091 -15.93570 -0.02819  
C -2.49254 -16.43640 0.02483  
H -2.31587 -17.37841 0.56824  
H -3.29889 -16.62498 -0.69547  
C -0.16226 -13.97225 -1.60286  
H 0.49746 -14.13895 -0.74375  
H 0.33504 -14.40879 -2.48490  
H -1.58414 -10.00456 -1.78719  
O -4.30964 -11.34663 0.68790  
O -4.04583 -12.66804 0.54421

45

<sup>1</sup>C<sup>o</sup> No O<sub>2</sub> (1)

Co -0.00813 -0.67562 0.00189  
Co -0.00207 0.77627 1.39702

H -2.93646 0.80912 2.01424  
H -2.20029 1.30435 0.45412  
H -1.20852 1.28349 1.92872  
N 1.60479 -0.62906 -1.10378  
N -1.62123 -0.63315 1.10747  
N 1.06305 -1.15178 1.56930  
C 2.70135 -1.27774 -0.29313  
H 3.39437 -0.48613 0.02172  
H 3.28222 -1.98429 -0.90385  
C 1.66847 -0.13216 2.46454  
H 0.88544 0.50899 2.88364  
H 2.35675 0.50073 1.89352  
H 2.22130 -0.61307 3.29161  
C 0.08540 -2.01042 2.31578  
H 0.45942 -2.24661 3.32993  
H -0.00922 -2.95113 1.76145  
H 2.12759 -1.32128 2.40705  
H -2.04735 -2.05552 2.68028  
H -1.26811 -0.56066 3.19869  
C 2.12530 -1.99355 0.92601  
H 1.65401 -2.93444 0.61949  
H 2.93219 -2.23207 1.64441  
C 1.99651 0.78133 -1.39886  
H 1.81893 1.28220 -1.93270  
H 2.17321 1.31402 -0.45798  
N -1.07658 -1.16478 -1.56336  
C 1.26311 -1.32426 -2.40054  
H 1.25090 -0.56682 -3.19513  
H 2.03873 -2.05522 -2.67105  
C -1.68793 -0.15247 -2.46277  
H -2.37849 0.47983 -1.89389  
H -0.90846 0.49038 -2.88589  
H -2.23948 -0.63983 -3.28693  
C -2.13370 -2.00975 -0.91588  
H -2.93904 -2.25722 -1.63300  
H -1.65647 -2.94592 -0.60416  
C -2.71418 -1.29117 0.29948  
H -3.29186 -1.99767 0.91329  
C -0.34190 -0.50448 -0.01949  
H -3.94024 -2.02096 -2.30622  
H 0.00637 -2.95862 -1.74776  
H -0.46679 -2.26373 -3.31930  
H 2.91237 0.81684 -2.01605

45

<sup>1</sup>C<sup>o</sup> No O<sub>2</sub> (3)

Co -0.00953 -0.18714 0.00093  
C -2.39913 0.85414 1.62124  
H -3.29701 0.64430 2.23163  
H -2.69581 1.43864 0.74298  
H -1.96953 1.44853 2.21626  
N 1.71027 -0.39086 -1.17107  
N -1.72809 -0.39532 1.17387  
N 1.01951 -1.24907 1.50625  
C 2.67484 -1.16482 -0.32247  
H 3.31357 -0.42994 0.18428  
H 3.33668 -1.78394 -0.95195  
C 1.69732 -0.38315 2.49480  
H 0.96994 0.72727 2.98671  
H 2.43613 0.25362 1.99638  
H 2.20915 -0.98787 3.26507  
C -0.05660 -2.04202 2.13822  
H 0.26510 -2.47363 3.10539  
H -0.29409 -2.88227 1.47492  
C -1.28550 -1.16179 2.38431  
H -2.11075 -1.77944 2.77846  
H -1.04203 -0.42126 3.15701  
C 1.99487 -2.04530 0.73114  
H 1.45609 -2.87843 0.26264  
H 2.77668 -2.48550 1.37936  
C 2.37445 0.86025 -1.62412  
H 1.66876 1.44778 -2.22227  
H 2.66751 1.45073 -0.74863  
N -1.03240 -1.26117 -1.49952  
C 1.27221 -1.16525 -2.37809  
H 1.02508 -0.42970 -3.15437  
H 2.10087 -1.78039 -2.76900  
C -1.71491 -0.40318 -2.49176  
H -2.45902 0.22974 -1.99637  
H -0.99143 0.25590 -2.98455  
C -2.22125 -1.01395 -3.26087  
C -0.00335 -2.05953 -0.72104  
H -2.78242 -2.50718 -1.36744  
H -1.45964 -2.88726 -0.24881  
C -2.68838 -1.17851 0.32886  
H -3.34634 -1.79894 0.96109  
H -3.33159 -0.44949 -0.18073  
C 0.04794 -2.05094 -2.12831  
H 0.29019 -2.88711 -1.46165  
H -0.27150 -2.48815 -3.09370  
H 2.37374 0.65256 -2.23317

45

<sup>1</sup>C<sup>o</sup> No O<sub>2</sub> (5)

Co -0.01018 0.12834 0.00034  
C -2.59779 0.77656 1.54583  
H -3.48161 0.53778 2.16292  
H -2.92589 1.27227 0.62462  
H -1.94926 1.46903 2.09601  
N 1.81579 -0.44131 -1.20253  
N -1.83317 -0.44623 1.20557  
N 0.96158 -1.16064 1.44594  
C 2.66022 -1.34645 -0.37083  
H 3.43234 -0.73049 0.10603  
H 3.18723 -2.08164 -1.00064  
C 1.73945 -0.30916 2.37907  
H 1.06197 0.35655 2.92455  
H 2.44610 0.31608 1.82292  
H 2.29453 -0.93368 3.10048  
C -0.07824 -1.92496 2.19251  
H 0.32423 -2.29262 3.15143  
H -0.34212 -2.80985 1.60160  
C -1.30594 -1.06455 2.45062  
H -2.08281 -1.66584 2.95308  
H -1.04439 -0.24323 3.13074  
C 1.85670 -2.08250 0.69671  
H 1.22630 -2.85501 0.24196  
H 2.54936 -2.59818 1.38474  
C 2.57366 0.78425 -1.54793  
H 1.92141 1.47078 -2.10113  
H 2.89891 1.28570 -0.62882  
N -0.97486 -1.17216 -1.43964  
C 1.29199 -1.06770 -2.44497  
H 1.02579 -0.25076 -3.12851  
H 2.07220 -1.66668 -2.94496  
C -1.75779 -0.32945 -2.37650  
H -2.46780 0.29431 -1.82301  
H -1.08428 0.33753 -2.92532  
H -2.30949 -0.96067 -3.09465  
C 1.86475 -2.09579 -0.68640  
H -2.55430 -2.61844 -1.37229  
H -1.23002 -2.86250 -0.22807  
C -2.67263 -1.35949 0.37765  
H -3.19585 -2.09462 1.01068  
H -3.44779 -0.74977 -0.10231  
C 0.06917 -1.93386 -2.18300  
H 0.33803 -2.81473 -1.58839  
H -0.33127 -2.30801 -3.14027  
H 3.45888 0.54781 -2.16394

47

<sup>1</sup>C<sup>o</sup> Side-on (1)

Co -0.00966 -0.13468 0.00086  
C -2.38090 0.86579 1.51865  
H -3.26034 0.64616 2.14373  
H -2.68652 1.39384 0.61102  
H -1.67313 1.49618 2.06494  
N 1.67710 -0.39174 -1.12971  
N -1.69516 -0.39624 1.13216  
N 0.93592 -1.26129 1.39656  
C 2.64526 -1.22932 0.32826  
H 3.31671 -0.53642 0.19027  
H 3.26654 -1.83375 -1.00476  
C 1.64987 0.36730 2.35846  
H 0.93517 0.27964 2.87250  
H 2.35543 0.27618 1.82811  
C 2.18899 -0.98050 3.09771  
H -0.09776 -2.03827 2.13036  
H 0.29764 -2.42391 3.08448  
H -0.37798 -2.90522 1.52201  
C -1.27326 -1.11243 2.38843  
H -2.12638 -1.66352 2.81144  
H -0.99052 -0.34385 3.11619  
C 1.92536 -2.10752 0.68184  
H 1.38679 -2.93183 0.20179  
H 2.65194 -2.55219 1.38209  
C 2.35590 0.87231 -1.52195  
H 1.64514 1.49590 -2.07213  
H 2.65766 1.40659 -0.61666  
N -0.94866 -1.27274 -1.38977  
C 1.25953 -1.11611 -2.38269  
H 0.97276 -0.35258 -3.11420  
H 2.11574 -1.66459 -2.80283  
C -1.66728 -0.38650 -2.35529  
H -2.37645 0.25502 -1.82742  
H -0.95585 0.26236 -2.87141  
H -2.20284 -1.00551 -3.09227  
C -1.93356 -2.12142 -0.67169  
H -2.65739 -2.57309 -1.37029  
H -1.39042 -2.94050 -0.18806  
C -2.65856 -1.24322 0.33475  
H -3.27557 -1.84878 1.01415  
H -3.33481 -0.55687 -0.18635  
C 0.08909 -2.04721 -2.12050

H 0.37430 -2.91004 -1.50868  
H -0.30442 -2.43899 -3.07288  
H 3.23716 0.65458 -2.14513  
O -0.40832 1.60159 -0.59983  
O 0.37944 1.60640 0.59389

47

<sup>1</sup>C<sup>o</sup> Half side-on/end-on (3)

Co -0.02828 0.03856 -0.01930  
C -2.61918 0.77805 1.62845  
H -3.47906 0.51633 2.26911  
H -2.98531 1.28574 0.72918  
H -1.96238 1.46753 2.17135  
N 1.84664 -0.41374 -1.19847  
N -1.84411 -0.41881 1.23596  
N 0.91554 -1.20208 1.37721  
C 2.67242 -1.33782 -0.37081  
H 3.43134 -0.73337 0.14001  
H 3.21678 -2.05533 -1.00752  
C 1.67657 -0.31379 2.30231  
H 0.98578 0.33491 2.84855  
H 2.36351 0.32400 1.73889  
H 2.24767 -0.92372 3.02145  
C -0.10147 -1.96451 2.15390  
H 0.33128 -2.32874 3.10052  
H -0.38243 -2.85006 1.57384  
C -1.31183 -1.08726 2.45154  
H -2.09250 -1.69357 2.94330  
H -1.03028 -0.29490 3.15658  
C 1.85162 -2.10810 0.66363  
H 1.25464 -2.89767 0.19593  
H 2.53529 -2.60016 1.37661  
C 2.63418 0.78151 -1.56980  
H 2.00025 1.46669 -2.14387  
H 2.96449 1.29638 -0.66054  
N -0.94802 -1.19302 -1.39768  
C 1.30787 -1.06156 -2.42400  
H 1.02487 -0.25792 -3.11618  
H 2.08700 -1.66067 -2.92706  
C -1.72788 -0.35805 -2.35380  
H -4.04388 0.26925 -1.85152  
H -2.05268 0.29628 -2.91095  
H -2.26922 -1.00671 -3.06096  
C -1.86419 -2.09602 -0.65212  
H -2.55887 -2.60093 -1.34491  
H -1.25420 -2.87713 -0.18712  
C -2.67501 -1.32344 0.39053  
H -3.23230 -2.04270 1.01408  
H 3.42331 -0.70256 -0.11672  
C 0.09772 -1.94760 -2.14543  
H 0.37531 -2.82831 -1.55661  
H -0.30705 -2.32131 -3.10048  
H 3.51831 0.51666 -2.17539  
O -0.41890 1.66454 -0.63559  
O 0.30698 1.88757 0.51115

47

<sup>1</sup>C<sup>o</sup> Side-on (5)

Co -0.01055 -0.06542 0.00115  
C -2.49753 0.80009 1.67930  
H -3.38493 0.55962 2.28957  
H -2.80896 1.38484 0.80684  
H -1.80632 1.40749 2.27388  
N 1.78350 -0.42109 -1.21951  
N -1.80173 -0.42655 1.22251  
N 1.00935 -1.19776 1.49515  
C 2.70300 -1.20002 -0.33685  
H 3.36044 -0.47457

H -2.22905 -1.02480 -3.23734  
C -1.98722 -2.04266 -0.71620  
H -2.73116 -2.50471 -1.38739  
H -1.42588 -2.86457 -0.25493  
C -2.71656 -1.21511 -0.34340  
H -3.36042 -1.88161 -0.94152  
H -3.37879 -0.49590 -0.15460  
C 0.05140 -2.02837 -2.12015  
H 0.28325 -2.86054 -1.44466  
H -0.30346 -2.47712 -3.06358  
H 3.36157 0.56879 -2.29079  
O -0.39648 1.82099 -0.56831  
O 0.37007 1.82499 0.55896

47

<sup>130</sup> End-on (1)

Co -2.47058 -13.51689 0.01632  
C -4.43199 -15.55320 1.15901  
H -4.61505 -16.51376 1.66814  
H -4.97150 -15.54860 0.20312  
H -4.81449 -14.73283 1.77698  
N -1.41927 -11.94808 -0.83098  
N -2.98649 -15.34892 0.90774  
N -1.35668 -13.14907 1.78818  
H -0.71837 -11.30263 0.32793  
H -1.45066 -10.64607 0.81308  
H 0.10651 -10.67016 -0.03703  
C -2.11956 -12.40932 2.82244  
H -2.95116 -13.01879 3.18689  
H -2.54893 -11.49614 2.39640  
H -1.45682 -12.15806 3.66679  
C -1.00950 -14.50506 2.26506  
H -0.62153 -14.48605 3.29882  
H -0.20767 -14.89616 1.62888  
C -2.25337 -15.39239 2.22463  
H -1.97938 -16.43085 2.46585  
H -2.96021 -15.06206 2.99426  
C -0.20910 -12.32952 1.33115  
H 0.54549 -12.99027 0.88867  
H 0.27089 -11.80936 2.17734  
C -2.24155 -10.91484 -1.51437  
H -2.73025 -11.36190 -2.38778  
H -3.00700 -10.56332 -0.81186  
N -1.41119 -14.67219 -1.29621  
C -0.42510 -12.50302 -1.82580  
H -0.84896 -12.35560 -2.82519  
H 0.50781 -11.92174 -1.78955  
C -2.25200 -14.76490 -2.52463  
H -3.21751 -15.22274 -2.28884  
H -2.43973 -13.76879 -2.93546  
H -1.74072 -15.37685 -3.28576  
C -1.22020 -16.02749 -0.71458  
H -0.96442 -16.76306 -1.49463  
H -0.37688 -15.98332 -0.01593  
C -2.50547 -16.43177 -0.01124  
H -2.36539 -17.37261 0.54387  
H -3.29728 -16.60772 -0.74987  
H -0.13561 -13.98155 -1.59848  
H 0.54020 -14.14190 -0.75114  
H 0.35082 -14.40804 -2.49222  
H -1.61218 -10.07360 -1.84700  
O -4.21357 -11.43654 0.72722  
O -0.41477 -12.74349 0.50370

47

<sup>130</sup> End-on (3)

Co -2.48225 -13.53571 0.00153  
C -4.43612 -15.55207 1.15372  
H -4.62055 -16.51936 1.64788  
H -4.97233 -15.52989 0.19851  
H -4.80765 -14.73899 1.78484  
N -1.42154 -11.95131 -0.84079  
N -2.98429 -15.35550 0.90420  
N -1.36690 -13.12452 1.82664  
C -0.74299 -11.29675 0.32489  
H -1.49103 -10.64960 0.79930  
H 0.07748 -10.65402 -0.03286  
C -2.10335 -12.40373 2.88847  
H -2.95956 -12.99654 3.22463  
H -2.49761 -11.46081 2.49705  
H -1.43746 -12.21261 3.74703  
C -1.01340 -14.49049 2.26607  
H -0.61405 -14.49733 3.29616  
H -0.21521 -14.86699 1.61562  
C -2.25018 -15.38937 2.22108  
H -1.96722 -16.42519 2.46287  
H -2.96070 -15.06391 2.98957  
C -0.22980 -12.30779 1.34398  
H 0.52487 -12.97320 0.90736  
H 0.25870 -11.76982 2.17451  
C -2.24474 -10.92652 -1.53743  
H -2.73902 -11.38582 -2.40140

H -3.00550 -10.55937 -0.83881  
N -1.42339 -14.68063 -1.31898  
C -0.42000 -12.50680 -1.82555  
H -0.83227 -12.35393 -2.82917  
H 0.51680 -11.93234 -1.77796  
C -2.24843 -14.78101 -2.55721  
H -3.21541 -15.24101 -2.33076  
H -2.43286 -13.78680 -2.97452  
H -1.72551 -15.39504 -3.30824  
C -1.22841 -16.03392 -0.72647  
H -0.96889 -16.77125 -1.50304  
H -0.38489 -15.98056 -0.02859  
C -2.50843 -16.43987 -0.01630  
H -2.36509 -17.38020 0.53855  
H -3.30461 -16.61538 -0.75064  
C -0.41493 -13.98700 -1.60065  
H 0.52012 -14.15134 -0.74315  
H 0.35633 -14.41490 -2.48683  
H -1.61352 -10.09340 -1.88706  
O -4.14176 -11.41431 0.77696  
O -3.99000 -12.71433 0.47887

47

<sup>130</sup> End-on (5)

Co -0.02873 -0.01752 -0.03451  
C -2.60848 0.77044 1.53511  
C -3.46976 0.52761 2.18071  
H -2.97304 1.25372 0.62197  
H -1.95158 1.47331 2.06032  
N 1.79047 -0.44235 -1.22692  
N -1.83756 -0.44426 1.17766  
N 0.95588 -1.18244 1.43508  
C 2.65182 -1.32401 -0.38287  
H 3.39846 -0.68349 0.10186  
H 3.20802 -2.04233 -1.00713  
C 1.72429 -0.32946 2.37758  
H 1.04215 0.33695 2.91400  
H 2.43560 0.29557 1.82928  
H 2.26865 -0.95973 3.10036  
C -0.09229 -1.94603 2.17158  
H 0.30112 -2.31576 3.13278  
H -0.35471 -2.82936 1.57743  
C -1.31593 -1.07405 2.42258  
H -2.09939 -1.67175 2.91910  
H -1.05087 -0.25790 3.10733  
H 1.86628 -2.08770 0.68160  
H 1.25127 -2.87349 0.22742  
H 2.57155 -2.58878 1.36622  
C 2.54550 0.77699 -1.60221  
H 1.90607 1.42854 -2.20769  
H 2.83218 1.32014 -0.69447  
N -0.98142 -1.24296 -1.45606  
C 1.28494 -1.11488 -2.45687  
H 1.01242 -0.32230 -3.16580  
H 2.07891 -1.71418 -2.93389  
C -1.74447 -0.37542 -2.38992  
H 2.45134 0.25178 -1.83659  
H -1.05820 0.28149 -2.93483  
H -2.30206 -0.99052 -3.11539  
C -1.89167 -2.13927 -0.69493  
H -2.59477 -2.65185 -1.37356  
H -1.27300 -2.91517 -0.22981  
C -2.68475 -1.36394 0.35900  
H -3.22198 -2.07912 1.00308  
H -3.44834 -0.75147 -0.13552  
C 0.07080 -1.99995 -2.19058  
H 0.34470 -2.87321 -1.58731  
H -0.32085 -2.38418 -3.14699  
H 3.45431 0.52987 -2.17705  
O -0.12249 1.82813 -0.14046  
O 0.51598 2.33871 0.92294

45

<sup>130</sup> No O<sub>2</sub> (2)

Ni -0.00988 -0.37037 0.00049  
C -2.24780 0.88789 1.54798  
H -3.15870 0.78413 2.16445  
H -2.49353 1.45995 0.64611  
H -1.49450 1.44224 2.11905  
N 1.67688 -0.43295 -1.15614  
N -1.69621 -0.43637 1.15761  
N 1.07206 -1.19097 1.58310  
C 2.68490 -1.15044 -0.30910  
H 3.32569 -0.38573 0.14769  
H 3.33627 -1.78918 -0.28231  
C 1.74568 -0.34679 2.58950  
H 1.01220 0.29463 3.09098  
H 2.48094 0.30309 2.10214  
H 2.26054 -0.96247 3.35052  
C -0.00632 -2.01298 2.18928  
H 0.30278 -2.43080 3.16617  
H -0.19719 -2.86140 1.51983

C -1.28231 -1.18699 2.38889  
H -2.09439 -1.84577 2.73798  
H -1.11070 -0.44376 3.17812  
C 2.04336 -1.99393 0.79732  
H 1.50184 -2.84339 0.36265  
H 2.84362 -2.40771 1.43971  
C 2.22134 0.89234 -1.55292  
H 1.46538 1.43960 -2.12731  
H 2.46332 1.47039 -0.65385  
N -1.08736 -1.20403 -1.57791  
C 1.26719 -1.19187 -2.38370  
H 1.09228 -0.45351 -3.17679  
H 2.08267 -1.84836 -2.72918  
C -1.76536 -0.36776 -2.58800  
H -2.50493 0.27954 -2.10372  
H -1.03590 0.27612 -3.09131  
H -2.27591 -0.98945 -3.34703  
C -2.05446 -2.00855 -0.78846  
H -2.85247 -2.42935 -1.42906  
H -1.50842 -2.53522 -0.35012  
C -2.70043 -1.16355 0.31432  
H -3.34781 -1.80323 0.93672  
H -3.34586 -0.40470 -0.14572  
C -0.00489 -2.02318 -2.18076  
H 0.18972 -2.86816 -1.50811  
H -0.31188 -2.44619 -3.15608  
H 3.13321 0.79063 -2.16832

45

<sup>130</sup> No O<sub>2</sub> (4)

Ni -0.01094 0.04950 -0.00029  
C -2.63071 0.79589 1.56956  
H -3.50849 0.53868 2.18831  
H -2.96899 1.29776 0.65537  
H -1.98769 1.49082 2.12301  
N 1.82877 -0.40224 -1.20838  
N -1.84825 -0.40631 1.20981  
N 0.93524 -2.16756 1.40835  
C 2.66188 -1.31949 -0.37647  
H 3.42701 -0.71036 0.11923  
H 3.19884 -2.04434 -1.01043  
C 1.69627 -2.07087 2.31623  
H 1.00615 0.38427 2.85724  
H 2.37944 0.36313 1.74205  
H 2.27379 -0.87008 3.04112  
C -0.09747 -1.91840 2.17554  
H 0.31821 -2.27415 3.13288  
H -0.37012 -2.80921 1.59845  
C -1.31727 -1.04027 2.44430  
H -2.09204 -1.63609 2.95011  
H -1.03679 -0.22721 3.12784  
C 1.85208 -2.07762 0.67374  
H 2.23584 -2.86031 0.21434  
H 1.54288 -2.57969 1.37283  
C 2.60504 0.80240 -1.57331  
H 1.95842 1.49175 -2.12954  
H 2.94089 1.30979 -0.66129  
N -0.95067 -1.17896 -1.40337  
C 1.29651 -1.04423 -2.44006  
H 1.01597 -0.23567 3.12705  
H 2.07886 -1.63800 -2.94350  
C -1.71668 -0.29116 -2.31578  
H -2.40365 0.34168 -1.74488  
H -3.44427 -0.36524 -2.85987  
H -2.29050 -0.89745 -3.03771  
C -1.86267 -2.09039 -0.66443  
H -2.55061 -2.59947 -1.36125  
H -1.24502 -2.86738 -0.20107  
C -2.67670 -1.33131 0.38181  
H -3.21058 -2.05560 0.10899  
H -3.44427 -0.72804 -0.11729  
C 0.08611 -1.92781 -2.16701  
H 0.36372 -2.81430 -1.58572  
H -0.32758 -2.29060 -3.12259  
H 3.48404 0.54710 -2.19114

47

<sup>130</sup> Side-on (2)

Ni -0.01092 -0.01022 0.00002  
C -2.57442 0.82866 1.54372  
H -3.44877 0.60216 2.17226  
H -2.91013 1.31926 0.62405  
H -1.90448 1.51408 2.07435  
N 1.80580 -0.39405 -1.19494  
N -1.82548 -0.39818 1.19620  
N 0.92793 -1.18079 1.39909  
C 2.65781 -1.30255 -3.37153  
H 3.40985 -0.68276 0.13050  
H 2.30737 -2.00990 1.01365  
C 1.69239 -0.30227 2.32958  
H 1.00481 0.35347 2.87097  
H 2.39028 0.32772 1.77145

H 2.24965 -0.92252 3.04978  
C -0.10525 -1.93476 2.16365  
H 0.31148 -2.29655 3.11768  
H -0.38423 -2.82086 1.58284  
C -1.30948 -1.04212 2.43457  
H -2.10183 -1.62793 2.93058  
H -1.02626 -0.23603 3.12281  
C 1.85733 -2.08309 0.66698  
H 1.25647 -2.87272 0.20599  
H 2.55039 -2.57509 1.37262  
C 2.54835 0.83509 -1.54795  
H 1.87491 1.51457 -2.08176  
H 2.88144 1.33156 -0.63049  
N -0.94327 -1.19224 -1.39385  
C 1.29312 -1.04613 -2.43036  
H 1.00536 -0.24473 -3.12215  
H 2.08858 -1.62977 -2.92392  
C -1.71237 -0.32217 -2.32841  
H -2.41364 0.30656 -1.77314  
H -1.02822 0.33476 -2.87266  
H -2.26621 -0.94886 -3.04564  
C -1.86795 -2.09606 -0.66039  
H -2.55819 -2.59499 -1.36121  
H 2.55039 -2.57509 1.37262  
C 2.54835 0.83509 -1.54795  
H 1.87491 1.51457 -2.08176  
H 2.88144 1.33156 -0.63049  
N -0.94327 -1.19224 -1.39385  
C 1.29312 -1.04613 -2.43036  
H 1.00536 -0.24473 -3.12215  
H 2.08858 -1.62977 -2.92392  
C -1.71237 -0.32217 -2.32841  
H -2.41364 0.30656 -1.77314  
H -1.02822 0.33476 -2.87266  
H -2.26621 -0.94886 -3.04564  
C -1.86795 -2.09606 -0.66039  
H -2.55819 -2.59499 -1.36121  
H 2.55039 -2.57509 1.37262  
C 2.54835 0.83509 -1.54795  
H 1.87491 1.51457 -2.08176  
H 2.88144 1.33156 -0.63049  
N -0.94327 -1.19224 -1.39385  
C 1.29312 -1.04613 -2.43036  
H 1.00536 -0.24473 -3.12215  
H 2.08858 -1.62977 -2.92392  
C -1.71237 -0.32217 -2.32841  
H -2.41364 0.30656 -1.77314  
H -1.02822 0.33476 -2.87266  
H -2.26621 -0.94886 -3.04564  
C -1.86795 -2.09606 -0.66039  
H -2.55819 -2.59499 -1.36121  
H 2.55039 -2.57509 1.37262  
C 2.54835 0.83509 -1.54795  
H 1.87491 1.51457 -2.08176  
H 2.88144 1.33156 -0.63049  
N -0.94327 -1.19224 -1.39385  
C 1.29312 -1.04613 -2.43036  
H 1.00536 -0.24473 -3.12215  
H 2.08858 -1.62977 -2.92392  
C -1.71237 -0.32217 -2.32841  
H -2.41364 0.30656 -1.77314  
H -1.02822 0.33476 -2.87266  
H -2.26621 -0.94886 -3.04564  
C -1.86795 -2.09606 -0.66039  
H -2.55819 -2.59499 -1.36121  
H 2.55039 -2.57509 1.37262  
C 2.54835 0.83509 -1.54795  
H 1.87491 1.51457 -2.08176  
H 2.88144 1.33156 -0.63049  
N -0.94327 -1.19224 -1.39385  
C 1.29312 -1.04613 -2.43036  
H 1.00536 -0.24473 -3.12215  
H 2.08858 -1.62977 -2.92392  
C -1.71237 -0.32217 -2.32841  
H -2.41364 0.30656 -1.77314  
H -1.02822 0.33476 -2.87266  
H -2.26621 -0.94886 -3.04564  
C -1.86795 -2.09606 -0.66039  
H -2.55819 -2.59499 -1.36121  
H 2.55039 -2.57509 1.37262  
C 2.54835 0.83509 -1.54795  
H 1.87491 1.51457 -2.08176  
H 2.88144 1.33156 -0.63049  
N -0.94327 -1.19224 -1.39385  
C 1.29312 -1.04613 -2.43036  
H 1.00536 -0.24473 -3.12215  
H 2.08858 -1.62977 -2.92392  
C -1.71237 -0.32217 -2.32841  
H -2.41364 0.30656 -1.77314  
H -1.02822 0.33476 -2.87266  
H -2.26621 -0.94886 -3.04564  
C -1.86795 -2.09606 -0.66039  
H -2.55819 -2.59499 -1.36121  
H 2.55039 -2.57509 1.37262  
C 2.54835 0.83509 -1.54795  
H 1.87491 1.51457 -2.08176  
H 2.88144 1.33156 -0.63049  
N -0.94327 -1.19224 -1.39385  
C 1.29312 -1.04613 -2.43036  
H 1.00536 -0.24473 -3.12215  
H 2.08858 -1.62977 -2.92392  
C -1.71237 -0.32217 -2.32841  
H -2.41364 0.30656 -1.77314  
H -1.02822 0.33476 -2.87266  
H -2.26621 -0.94886 -3.04564  
C -1.86795 -2.09606 -0.66039  
H -2.55819 -2.59499 -1.36121  
H 2.55039 -2.57509 1.37262  
C 2.54835 0.83509 -1.54795  
H 1.87491 1.51457 -2.08176  
H 2.88144 1.33156 -0.63049  
N -0.94327 -1.19224 -1.39385  
C 1.29312 -1.04613 -2.43036  
H 1.00536 -0.24473 -3.12215  
H 2.08858 -1.62977 -2.92392  
C -1.71237 -0.32217 -2.32841  
H -2.41364 0.30656 -1.77314  
H -1.02822 0.33476 -2.87266  
H -2.26621 -0.94886 -3.04564  
C -1.86795 -2.09606 -0.66039  
H -2.55819 -2.59499 -1.36121  
H 2.55039 -2.57509 1.37262  
C 2.54835 0.83509 -1.54795  
H 1.87491 1.51457 -2.08176  
H 2.88144 1.33156 -0.63049  
N -0.94327 -1.19224 -1.39385  
C 1.29312 -1.04613 -2.43036  
H 1.00536 -0.24473 -3.12215  
H 2.08858 -1.62977 -2.92392  
C -1.71237 -0.32217 -2.32841  
H -2.41364 0.30656 -1.77314  
H -1.02822 0.33476 -2.87266  
H -2.26621 -0.94886 -3.04564  
C -1.86795 -2.09606 -0.66039  
H -2.55819 -2.59499 -1.36121  
H 2.55039 -2.57509 1.37262  
C 2.54835 0.83509 -1.54795  
H 1.87491 1.51457 -2.08176  
H 2.88144 1.33156 -0.63049  
N -0.94327 -1.19224 -1.39385  
C 1.29312 -1.04613 -2.43036  
H 1.00536 -0.24473 -3.12215  
H 2.08858 -1.62977 -2.92392  
C -1.71237 -0.32217 -2.32841  
H -2.41364 0.30656 -1.77314  
H -1.02822 0.33476 -2.87266  
H -2.26621 -0.94886 -3.04564  
C -1.86795 -2.09606 -0.66039  
H -2.55819 -2.59499 -1.36121  
H 2.55039 -2.57509 1.37262  
C 2.54835 0.83509 -1.54795  
H 1.87491 1.51457 -2.08176  
H 2.88144 1.33156 -0.63049  
N -0.94327 -1.19224 -1.39385  
C 1.29312 -1.04613 -2.43036  
H 1.00536 -0.24473 -3.12215  
H 2.08858 -1.62977 -2.92392  
C -1.71237 -0.32217 -2.32841  
H -2.41364 0.30656 -1.77314  
H -1.02822 0.33476 -2.87266  
H -2.26621 -0.94886 -3.04564  
C -1.86795 -2.09606 -0.66039  
H -2.55819 -2.59499 -1.36121  
H 2.55039 -2.57509 1.37262  
C 2.54835 0.83509 -1.54795  
H 1.87491 1.51457 -2.08176  
H 2.88144 1.33156 -0.63049  
N -0.94327 -1.19224 -

45  
**<sup>1</sup>Cu** No O<sub>2</sub> (1)  
Cu -0.01072 -0.11670 -0.00003  
C -2.35998 0.92022 1.60158  
H -3.25897 0.72278 2.21290  
H -2.65124 1.50459 0.72177  
H -1.65046 1.50774 2.19478  
N 1.68990 -0.33928 -1.16119  
N -1.70993 -0.34298 1.16239  
N 1.09134 -1.26514 1.61008  
C 2.65689 -1.10463 -0.30977  
H 3.27864 -0.36262 0.20807  
C 3.33239 -1.70099 -0.94676  
C 1.80260 -0.51666 2.65437  
H 1.10498 0.13293 3.19633  
H 2.57065 0.12568 2.20759  
H 2.28936 -1.19659 3.38018  
C -0.05078 -0.20066 2.14798  
H 0.18975 -2.50292 3.11535  
H -0.29151 -2.82905 1.44753  
C -1.26717 -1.10883 2.37163  
H -2.10366 -1.79097 2.76869  
H -1.01109 -0.36703 3.13916  
C 2.00683 -2.01989 0.74029  
H 1.44010 -2.82631 0.25784  
H 2.81965 -2.50487 1.31468  
C 2.33340 0.92538 -1.60585  
H 1.62094 1.50643 -2.20189  
H 2.62133 1.51533 -0.72865  
N -1.10657 -1.27821 -1.60500  
C 1.25123 -1.11269 -2.36706  
H 0.99125 -0.37571 -3.13791  
H 2.09086 -1.71034 -2.76141  
C -1.82188 -0.53868 -2.65289  
H -2.59247 0.10277 -2.20918  
H -1.12747 0.11095 -3.19888  
H -2.30624 -1.22467 -3.37461  
C -2.01773 -2.03366 -0.73137  
H -2.82763 -2.52654 -1.30315  
H -1.44607 -2.83397 -0.24474  
C -2.67290 -1.11702 3.14342  
H -3.34539 -1.71410 0.95383  
H -3.29836 -0.38046 -0.20682  
C 0.03974 -2.03007 -2.13907  
H 0.28529 -2.83320 -1.43430  
H -0.19794 -2.51873 -3.10394  
H 3.23360 0.72997 -2.21605

45  
**<sup>1</sup>Cu** No O<sub>2</sub> (3)  
Cu -0.01088 -0.00020 -0.00025  
C -2.53346 0.82858 1.50281  
H -3.42559 0.61022 2.11534  
H -2.84208 1.31870 0.57235  
N -1.87132 1.51100 2.04833  
N 1.77712 -0.41049 -1.18115  
N -1.79669 -0.41449 1.18257  
N 0.99972 -1.17722 1.50300  
C 2.64679 -1.31190 -0.35724  
H 3.40836 -0.68241 0.11800  
H 3.18284 -2.02267 -1.00586  
C 1.78598 -0.35786 2.45187  
H 1.11892 0.31328 3.00282  
H 2.50695 0.26267 1.90978  
C 2.32363 -1.00693 3.16519  
C -0.07663 -1.92289 2.21266  
H 0.28647 -2.30539 3.18175  
H -0.34521 -2.79777 1.60863  
C -1.28608 -1.03115 2.44323  
H -2.08742 -1.60214 2.94103  
H -1.01348 -0.20656 3.11428  
C 1.87416 -2.07978 0.70869  
H 1.23480 -2.84297 0.24976  
H 2.58888 -2.61054 1.36253  
C 2.50751 0.83492 -1.50695  
H 1.84179 1.51169 -2.05515  
H 2.81398 1.33050 -0.57870  
N -1.01519 -1.08935 1.49801  
C 1.26968 -1.03528 -2.43906  
H 0.99244 -2.01511 -3.11356  
H 2.07406 -1.60396 -2.93455  
C -1.80615 -0.37899 -2.45055  
H -2.52968 0.24084 -1.91110  
H -1.14290 0.29257 -3.00559  
H -2.34118 -1.03450 -3.15995  
C -1.88460 -2.09296 -0.69933  
H -2.59619 -2.63107 -1.35057  
H -1.24094 -2.84995 -0.23638  
C -2.66165 -1.32406 0.36263  
H -3.19432 -2.03438 1.01452  
H -3.42618 -0.70067 -0.11593  
C 0.06514 -1.93257 -2.20431

H 0.33854 -2.80318 -1.59633  
H -0.29595 -2.32146 -3.17160  
H 3.40057 0.61848 -2.11884

47  
**<sup>1</sup>Cu** Side-on (1)  
Cu -0.01105 0.08987 -0.00043  
C -2.74673 0.73966 1.69333  
H -3.60804 0.44386 2.32042  
H -3.12121 1.26513 0.80679  
H -2.11870 1.43499 2.26353  
N 1.91493 -0.41361 -1.27358  
N -1.93444 -0.41778 1.27494  
N 0.93271 -1.13022 1.40215  
C 2.69739 -1.30491 -0.38935  
H 3.45087 -0.68731 0.11545  
H 3.25417 -2.06510 -0.96736  
C 1.69034 -0.26008 2.34125  
H 0.99769 0.38486 2.89076  
H 2.38690 0.37791 1.78916  
H 2.25244 -0.88196 3.05698  
C -0.09869 -1.90748 2.14758  
H 0.32772 -2.27847 3.09449  
H -0.35266 -2.79186 1.55355  
C -1.34686 -1.07979 2.45775  
H -2.07961 -1.73791 2.96187  
H -1.08790 -0.28788 3.17350  
C 1.85775 -2.03494 0.66674  
H 1.25011 -2.82365 0.21128  
H 2.53944 -2.53123 1.37854  
C 2.72100 0.74627 -1.69714  
H 2.08937 1.43546 -2.27079  
H 3.09224 1.27795 -0.81295  
N -0.94827 -1.14160 -1.39718  
C 1.33088 -1.08397 -2.45335  
H 1.06776 -0.29669 -3.17267  
H 2.06703 -1.74046 -2.95459  
C -1.71068 -0.27996 -2.34024  
H -2.41067 0.35668 -1.79097  
H 1.02153 0.36616 -2.89274  
C -2.26937 -0.90840 -3.05289  
C -1.86855 -2.04782 -0.65764  
H -2.54740 -2.55100 -1.36730  
H -1.25679 -2.83098 -0.19833  
C -2.71224 -1.31724 0.39481  
H -3.26514 -2.07747 0.97642  
H -3.46882 -0.70597 -0.11311  
C 0.08711 -1.91679 -2.13927  
H 0.34575 -2.79721 -1.54146  
H -0.33740 -2.29437 -3.08444  
H 3.58420 0.45236 -2.32255  
O -0.36726 1.91593 -0.57621  
O 0.33589 1.91986 0.56738

47  
**<sup>1</sup>Cu** Side-on TS (3)  
Cu -0.01090 0.05102 -0.00037  
C -2.64588 0.78225 1.62073  
H -3.48832 0.53202 2.29013  
H -3.04158 1.27236 0.72385  
H -1.98368 1.48896 2.13623  
N 1.85415 -0.41066 -1.23043  
N -1.87375 -0.41469 1.23173  
N 0.96605 -1.16503 1.45217  
C 2.67702 -1.30254 -0.37269  
H 3.42923 -0.67629 0.12281  
C 3.32357 -2.03721 -0.98125  
C 1.73037 -0.31438 2.39527  
H 1.04484 0.33185 2.95300  
H 2.42884 0.32778 1.84870  
H 2.29574 -0.94005 3.10709  
C -0.08706 -1.92611 2.17470  
H 0.29980 -2.30716 3.13541  
H -0.34779 -2.80443 1.57310  
C -1.32193 -1.06700 2.44461  
H -2.08741 -1.68987 2.94159  
H -1.05942 -2.65058 3.14769  
C 1.87174 -2.05935 0.68935  
H 1.25425 -2.83852 0.22861  
H 2.57671 -2.57091 1.36839  
C 2.61979 0.78868 -1.62485  
H 1.95385 1.48920 -2.14393  
H 3.01241 1.28520 -0.73016  
N -0.98138 -1.17674 -1.44698  
C 1.30589 -1.07135 -2.44033  
H 1.03923 -0.27406 -3.14706  
H 2.07463 -1.69242 -2.93446  
H -1.75041 -0.33456 -2.39387  
C -2.45200 0.30651 -1.85004  
H -1.06840 0.31256 -2.95487  
H -2.31268 -0.96673 -3.10237  
C -1.88229 -2.07238 -0.68012

H -2.58426 -2.59096 -1.35694  
H -1.26060 -2.84578 -0.21554  
C -2.69187 -1.31493 0.37813  
H -3.24352 -2.04956 0.99026  
H -3.44731 -0.69510 -0.12055  
C 0.07553 -1.93560 -2.16634  
H 0.34090 -2.80990 -1.56098  
H -0.30957 -2.32291 -3.12524  
H 3.46390 0.54000 -2.29273  
O -0.22865 2.00689 -0.63042  
O 0.19690 2.00984 0.62106

47  
**<sup>1</sup>Cu** End-on (1)  
Cu -2.52458 -13.50701 -0.00937  
C -4.43331 -15.64028 1.18368  
H -4.60726 -16.61172 1.67686  
H -4.96515 -15.62942 0.22562  
H -4.83239 -14.83958 1.81522  
N -1.36141 -11.87767 -0.84220  
N -2.98824 -15.41064 0.94757  
N -1.35290 -13.11516 1.85624  
C -0.63353 -11.30569 0.33123  
H -1.31818 -10.59459 0.81122  
H 0.24182 -10.73102 -0.01583  
C -2.08392 -12.36070 2.89178  
H -2.97305 -12.91951 3.20909  
H -2.42368 -11.39906 2.49111  
H -1.44225 -12.18050 3.77315  
C -1.03147 -14.48275 3.30671  
H -0.64244 -14.49369 3.34201  
H -0.23032 -14.87108 1.66706  
C -2.26595 -15.39081 2.25977  
H -1.97074 -16.41526 2.54006  
H -2.98686 -15.05104 3.01346  
C -0.19192 -12.34784 1.35933  
H 0.52972 -13.04876 0.92293  
H 0.33092 -11.82667 2.18137  
C -2.16642 -10.80725 -1.47733  
H -2.70532 -11.21853 -2.33847  
H -2.89557 -10.43042 -0.75091  
N -1.43785 -14.69768 -1.37984  
C -0.44444 -12.48088 1.86070  
H 0.91364 -12.33903 -2.84147  
H 0.51217 -11.93488 -1.88427  
C -2.22626 -14.85566 -2.62683  
H -3.17855 -15.35114 -2.41095  
H -2.44717 -13.87643 -3.06414  
H -1.66609 -15.48568 -3.36198  
C -1.21538 -16.01310 -0.72822  
H -0.94230 -16.78083 -1.47194  
H -0.36656 -15.91374 -0.04141  
C -2.47108 -16.45459 0.01592  
H -2.7146 -17.39327 0.55945  
H -3.26961 -16.66500 -0.70718  
C -0.17431 -13.96855 -1.63712  
H 0.48405 -14.12758 -0.77550  
H 0.34625 -14.37564 -2.52137  
H -1.52536 -9.97765 -1.82105  
O -4.44035 -11.45139 0.61654  
O -4.27416 -12.72731 0.39775

47  
**<sup>1</sup>Cu** End-on (3)  
Cu -2.52686 -13.49065 0.00854  
C -4.43082 -15.62249 1.20010  
H -4.60285 -16.62598 1.69051  
H -4.96533 -15.63941 0.24348  
H -4.83275 -14.85621 1.83607  
N -1.35476 -11.86369 -0.83127  
N -2.98805 -15.41555 0.96184  
N -1.34959 -13.12145 1.84854  
C -0.60651 -11.30789 0.33689  
H -1.27206 -10.58224 0.82198  
H 0.27937 -10.75203 -0.01398  
C -2.08815 -12.36013 2.87518  
H -2.98740 -12.96634 3.17917  
H -2.40942 -11.39340 2.47174  
H -1.45720 -12.18781 3.76565  
C -1.03020 -14.48611 2.31201  
H -0.64116 -14.48593 3.34721  
H -0.22930 -14.87949 1.67544  
C -2.26431 -15.39496 2.27118  
H -1.96601 -16.41811 2.55417  
H -2.98289 -15.03453 3.02691  
C -0.17983 -12.35980 1.36139  
H 0.53677 -13.06487 0.92394  
H 0.34321 -11.84826 2.18960  
C -1.50420 -10.77839 -1.45097  
H -2.70404 -11.17568 -2.30924  
H -2.86828 -10.39394 -0.71726  
N -1.44250 -14.69761 -1.38562

C -0.45856 -12.47318 -1.86316  
H -0.94649 -12.33402 -2.83530  
H 0.49854 -11.92875 -1.90703  
C -2.22909 -14.86490 -2.63090  
H -3.17968 -15.36315 -2.41294  
H -2.45561 -13.88882 -3.07278  
H -1.66799 -15.46895 -3.36515  
C -1.21618 -16.00704 -0.72699  
H -0.94440 -16.78094 -1.46550  
H -0.36437 -15.90309 -0.04434  
C -2.46733 -16.45246 0.02619  
H -2.25869 -17.39195 0.56573  
C -3.26762 -16.66684 -0.69393  
C -0.18456 -13.96215 -1.64448  
H 0.47855 -14.12112 -0.78623  
H 0.33667 -14.36109 -2.53261  
H -1.50298 -9.95373 -1.79499  
O -4.53730 -11.48310 0.49479  
O -4.30806 -12.74735 0.32348

## 14-TMC ligand (2)

51  
**<sup>2</sup>Cr** No O<sub>2</sub> (2)  
Cr -0.07395 0.06933 -0.06189  
H 1.73085 -1.41027 -3.78948  
H -0.63736 -1.20471 -3.82144  
H -1.73821 0.93437 -3.65836  
H 1.40093 0.28456 -3.53411  
C 1.32208 -0.70081 -3.05354  
H -0.19993 1.56736 -3.00676  
C -0.13778 -1.09806 -2.83970  
C -1.15927 1.11840 -2.73577  
H -2.89991 -0.79317 -2.61891  
H 1.73282 1.84549 -2.13977  
H -0.17218 -2.07505 -2.33682  
H 3.28237 -0.68138 -2.14255  
H -1.69823 1.83587 -2.10788  
N -0.94208 -0.15670 -2.00022  
H 3.39372 1.62510 -1.52119  
C 2.22771 -0.78698 -1.82408  
C -2.26394 -0.79645 -1.71435  
H -2.06995 -1.84339 -1.44816  
C 2.32176 1.58565 -1.25561  
H 2.11764 -1.77961 -1.36524  
H -3.19534 0.95552 -0.86691  
N 1.96071 0.23171 -0.75910  
H 2.10926 2.32231 -0.47235  
C -2.97008 -0.07858 -0.57966  
H -3.93309 -0.56854 -0.35585  
H 3.81124 -0.44733 0.10396  
C 2.82864 -0.06350 0.42833  
H -2.12955 -2.13398 0.74730  
N -2.10946 -0.02897 0.64731  
H 2.00490 -2.01412 0.85071  
H 3.01361 0.88469 0.94757  
H -2.42255 2.05216 0.86797  
C 2.15905 -1.05433 1.36075  
C -2.30860 -1.29131 1.42984  
H 0.15509 -2.54262 1.67706  
H -3.36891 -1.33463 1.74272  
C -2.54126 1.3828 1.46034  
H -3.59840 1.02829 1.76449  
N 0.81379 -0.55586 1.78920  
H 2.79854 -1.24050 2.24321  
C 0.06314 -1.70601 2.38424  
H 1.52302 1.36519 2.37695  
C -1.41653 -1.44931 2.66190  
H -1.92539 1.23288 2.35872  
H -1.78830 -2.33424 3.20088  
C 0.98322 0.51508 2.80626  
H 0.56847 -2.00196 3.32322  
H 0.00782 0.87571 3.14588  
H -1.55291 -0.61311 3.36135  
H 1.54291 0.12703 3.67679

51  
**<sup>2</sup>Cr** No O<sub>2</sub> (4)  
Cr -0.07552 0.06405 -0.05697  
H 1.73335 -1.42214 -3.78704  
H -0.63353 -1.20217 -3.82920  
H -1.73743 0.92432 -3.69205  
H 1.41563 0.27707 -3.54358  
C 1.32676 -0.70477 -3.05786  
H -0.20901 1.57957 -3.03611  
C -0.13655 -1.09075 -2.84740  
C -1.16647 1.12448 -2.76782  
H -2.89878 -0.78763 -2.61454  
H 1.74134 1.84484 -2.15602  
H -0.17774 -2.06526 -2.33973  
H 3.28161 -0.69864 -2.13363

H -1.71299 1.84346 -2.14835  
N -0.94178 -0.13943 -2.01819  
H 3.40396 1.60658 -1.54555  
C 2.22434 -0.79250 -1.82237  
C -2.25767 -0.78495 -1.71467  
H -2.05777 -1.83108 -1.44927  
C 2.33304 1.58442 -1.27401  
H 2.10246 -1.78149 -1.35814  
H -3.17893 0.96607 -0.85472  
N 1.96173 0.23709 -0.76632  
H 2.12868 2.32782 -0.49506  
C -2.96217 -0.07184 -0.57567  
H -3.92828 -0.55791 -0.35888  
H 3.80448 -0.43226 0.11013  
C 2.81962 -0.05189 0.42986  
H -2.13503 -2.14272 0.75129  
N -2.11107 -0.03650 0.65849  
H 1.99473 -2.00296 0.84981  
H -2.40818 2.04576 0.88942  
C 2.15185 -1.04475 1.36220  
C -2.31284 -1.30109 1.43554  
H 0.15964 -2.53771 1.68053  
H -3.37292 -1.34248 1.74771  
C -2.54129 1.12963 1.47552  
H -3.60162 1.02080 1.76796  
N 0.81024 -0.54843 1.80561  
H 2.29749 0.89860 0.94703  
H -2.40818 2.04576 0.88942  
C 2.15185 -1.04475 1.36220  
C -2.31284 -1.30109 1.43554  
H 0.15964 -2.53771 1.68053  
H -3.37292 -1.34248 1.74771  
C -2.54129 1.12963 1.47552  
H -3.60162 1.02080 1.76796  
N 0.81024 -0.54843 1.80561  
H 2.29749 0.89860 0.94703  
H -2.40818 2.04576 0.88942  
C 2.15185 -1.04475 1.36220  
C -2.31284 -1.30109 1.43554  
H 0.15964 -2.53771 1.68053  
H -3.37292 -1.34248 1.74771  
C -2.54129 1.12963 1.47552  
H -3.60162 1.02080 1.76796  
N 0.81024 -0.54843 1.80561  
H 2.29749 0.89860 0.94703  
H -2.40818 2.04576 0.88942  
C 2.15185 -1.04475 1.36220  
C -2.31284 -1.30109 1.43554  
H 0.15964 -2.53771 1.68053  
H -3.37292 -1.34248 1.74771  
C -2.54129 1.12963 1.47552  
H -3.60162 1.02080 1.76796  
N 0.81024 -0.54843 1.80561  
H 2.29749 0.89860 0.94703  
H -2.40818 2.04576 0.88942  
C 2.15185 -1.04475 1.36220  
C -2.31284 -1.30109 1.43554  
H 0.15964 -2.53771 1.68053  
H -3.37292 -1.34248 1.74771  
C -2.54129 1.12963 1.47552  
H -3.60162 1.02080 1.76796  
N 0.81024 -0.54843 1.80561  
H 2.29749 0.89860 0.94703  
H -2.40818 2.04576 0.88942  
C 2.15185 -1.04475 1.36220  
C -2.31284 -1.30109 1.43554  
H 0.15964 -2.53771 1.68053  
H -3.37292 -1.34248 1.74771  
C -2.54129 1.12963 1.47552  
H -3.60162 1.02080 1.76796  
N 0.81024 -0.54843 1.80561  
H 2.29749 0.89860 0.94703  
H -2.40818 2.04576 0.88942  
C 2.15185 -1.04475 1.36220  
C -2.31284 -1.30109 1.43554  
H 0.15964 -2.53771 1.68053  
H -3.37292 -1.34248 1.74771  
C -2.54129 1.12963 1.47552  
H -3.60162 1.02080 1.76796  
N 0.81024 -0.54843 1.80561  
H 2.29749 0.89860 0.94703  
H -2.40818 2.04576 0.88942  
C 2.15185 -1.04475 1.36220  
C -2.31284 -1.30109 1.43554  
H 0.15964 -2.53771 1.68053  
H -3.37292 -1.34248 1.74771  
C -2.54129 1.12963 1.47552  
H -3.60162 1.02080 1.76796  
N 0.81024 -0.54843 1.80561  
H 2.29749 0.89860 0.94703  
H -2.408

53  
2<sup>Cr</sup> Side-on (2)  
Cr -0.08317 0.49881 -0.00578  
H 1.72357 -1.56935 -3.63821  
H -0.65699 -1.49168 -3.58944  
H -1.55562 0.62641 -3.79285  
H 1.31339 0.12857 -3.55834  
C 1.29861 -0.80174 -2.97452  
H -0.17053 1.47108 -3.03516  
C -0.12852 -1.23265 -2.65417  
C -1.12123 0.97039 -2.83957  
H -2.90268 -0.78814 -2.51255  
H 1.86157 1.89246 -2.28606  
H -0.11163 -2.13416 -2.02397  
H 3.26848 -0.61647 -2.10871  
H -1.79256 1.69912 -2.37777  
N -0.92551 -0.19718 -1.93251  
H 3.48842 1.63926 -1.58921  
C 2.22406 -0.72223 -1.76741  
C -2.27150 -0.75619 -1.60829  
H -2.13483 -1.79430 -1.27794  
C 2.40998 1.67823 -1.36376  
H 2.19599 -1.67346 -1.22366  
H -3.06532 1.11515 -0.86516  
N 1.96362 0.38415 -0.78437  
H 2.20618 2.47486 -0.64143  
C -2.94256 0.07738 -0.53299  
H -3.94700 -0.32108 -0.31189  
H 3.81917 -0.18073 0.12606  
O 2.1050 0.215825 0.83052  
C 2.79772 0.10630 0.42724  
H -2.23150 -2.00429 0.65698  
N -2.11578 0.10396 0.71540  
H 2.09165 -1.92611 0.71448  
H 2.87314 1.04188 0.99478  
H -2.44779 2.15786 1.07087  
H -2.17440 -0.98609 1.27488  
C -2.32206 -1.21194 1.41071  
H 0.08885 -2.52918 1.32710  
H -3.36504 -1.23064 1.77091  
H -2.61884 1.20439 1.58000  
H -3.69481 1.06915 1.77817  
N 0.80098 -0.58877 1.70665  
H 2.80813 -1.18908 2.15455  
C 0.06243 -1.80573 2.15528  
H 1.58296 1.18478 2.58695  
C -1.38221 -1.54080 2.56335  
H -2.07987 1.21373 2.53206  
H -1.76227 -2.47069 3.01192  
C 0.93637 0.34684 2.86014  
H 0.60880 -2.25489 3.00429  
H -0.03589 0.75652 3.14282  
H -1.44085 -0.79015 3.36292  
H 1.37266 -0.18806 3.71992  
O -0.47228 2.28779 -0.43220

53  
2<sup>Cr</sup> Side-on (4)  
Cr -0.08335 0.50263 -0.00486  
H 1.72487 -1.57470 -3.63737  
H -0.65605 -1.49626 -3.59172  
H -1.55971 0.62673 -3.79556  
H 1.31425 0.12328 -3.56294  
C 1.29896 -0.80532 -2.97645  
H -0.16821 1.46542 -3.04284  
C -0.12852 -1.23603 -2.65653  
C -1.12039 0.96885 -2.84391  
H -2.90502 -0.78851 -2.51032  
H 1.86252 1.89259 -2.29035  
H -0.11226 -2.13675 -2.02521  
H 3.26780 -0.61550 -2.10989  
H -1.78576 1.70055 -2.37820  
N -0.92613 -0.19948 -1.93780  
H 3.48699 1.64347 -1.58591  
C 2.22362 -0.72256 -1.76881  
C -2.27116 -0.75587 -1.60810  
H -2.13472 -1.79362 -1.27656  
C 2.40750 1.68051 -1.36568  
H 2.16060 -1.67292 -1.22350  
H -3.05799 1.11860 -0.86440  
N 1.96283 0.38533 -0.78754  
H 2.19628 2.47580 -0.64410  
C -2.93934 0.08025 -0.53264  
H -3.94489 -0.31463 -0.31139  
H 3.81652 -0.17414 0.12633  
O 0.18948 2.16579 0.84843  
C 2.79419 0.10930 0.42707  
H -2.23283 -2.00406 0.65713  
N -2.11545 0.10418 0.71837  
H 2.09165 -1.92488 0.71305  
H 2.86566 1.04529 0.99438

H -2.43816 2.15845 1.07343  
C 2.17429 -0.98554 1.27459  
C -2.32188 -1.21262 1.41193  
H 0.08937 -2.53133 1.32744  
H -3.36462 -1.22994 1.77233  
C -2.61712 1.20613 1.58185  
H -3.69431 1.07390 1.77488  
N 0.80222 -0.59200 1.71168  
H 2.81124 -1.18863 2.15177  
C 0.06257 -1.80916 2.15670  
H 1.57872 1.18458 2.58944  
C -1.38239 -1.54407 2.56429  
H -2.08190 1.21249 2.53592  
H -1.76321 -2.47473 3.01048  
C 0.93667 0.34388 2.86487  
H 0.60778 -2.25999 3.00527  
H -0.03647 0.75011 3.14959  
H -1.44138 -0.79520 3.36548  
H 1.37667 -0.18967 3.72357  
O -0.45361 2.30156 -0.44670

53  
2<sup>Cr</sup> End-on (2)  
Cr -0.07434 0.37499 -0.02959  
H 1.67994 -1.63946 -3.61979  
H -0.68176 -1.37366 -3.62045  
H -1.66065 0.88947 -3.64728  
H 1.40684 0.08324 -3.52845  
C 1.30670 -0.84725 -2.95394  
H -0.06636 1.44714 -3.06621  
C -0.15411 -1.17627 -2.67105  
C -1.05511 1.10293 -2.75189  
H -2.91266 -0.62354 -2.55737  
H 1.87893 1.77932 -2.29470  
H -0.20742 -2.09971 -2.07433  
H 3.27210 -0.82304 -2.05043  
H -1.51518 1.90294 -2.15676  
N -0.92241 -0.12824 -1.92362  
C 5.52297 1.47926 -1.66438  
C 2.21574 -0.84645 -1.72916  
C -2.29123 -0.67512 -1.64880  
H -2.18230 -1.73719 -1.39297  
C 2.45678 1.55548 -1.39380  
H 2.06710 -1.78702 -1.18001  
H -3.04804 1.14927 -0.77638  
N 1.99840 0.28586 -0.77033  
H 2.31372 2.37495 -0.68310  
C -2.94072 0.08814 -0.51691  
H -3.94731 -0.31262 -0.30925  
H 3.85932 -0.27065 0.14882  
C -0.14031 2.10729 0.01098  
C 2.84595 0.05227 0.44166  
H -2.06792 -2.08512 0.58981  
N -2.09177 0.02622 0.71620  
H 2.15217 -1.95569 0.85290  
H 2.95062 0.10353 0.96083  
H -2.40450 2.05810 1.18157  
C 2.21104 -0.97831 1.34885  
C -2.26159 -1.31891 1.35330  
H 0.21663 -2.56440 1.47335  
H -3.31950 -1.42063 1.65163  
C -2.59396 1.07959 1.64170  
H -3.67439 0.94105 1.81535  
N 0.81725 -1.26654 1.71873  
H 2.81887 -1.11499 2.25829  
C 0.10847 -1.78080 2.23773  
H 1.46339 1.33413 2.42393  
C -1.36749 -1.58930 2.55921  
H -2.08048 1.02727 2.60651  
H 1.71360 -2.53568 3.00043  
C 0.89699 0.47090 2.78614  
H 0.64354 -2.12825 3.13900  
H -0.10333 0.81257 3.06174  
H -1.51173 -0.83550 3.34666  
H 1.39717 0.05454 3.67632  
O -1.14406 3.01546 -0.23767

53  
2<sup>Cr</sup> End-on (6)  
Cr -0.07908 0.27638 -0.01641  
H 1.72159 -1.54036 -3.69157  
H -0.64133 -1.34312 -3.76128  
H -1.65670 0.78302 -3.81891  
H 1.39911 0.16969 -3.54263  
C 1.30667 -0.78534 -3.00729  
H -0.20804 1.53366 -3.08834  
C -0.15651 -1.16091 -2.78441  
C -1.16652 1.05507 -2.86809  
H -2.94760 -0.76033 -2.56881  
H 1.79718 1.83803 -2.25280  
H -0.20287 -2.10152 -2.21608  
H 3.25105 -0.76865 -2.06608

H -1.78715 1.78259 -2.33668  
N -0.95996 -0.15295 -2.03113  
H 3.45869 1.52548 -1.67534  
C 2.19019 -0.80839 -1.76065  
C -2.28450 -0.74909 -1.68622  
H -2.11557 -1.79542 -1.39886  
C 2.40007 1.59070 -1.37410  
H 2.03768 -1.76104 -1.23440  
H -3.09953 1.06473 -0.83925  
N 1.96038 0.30116 -0.77722  
C 2.27236 2.38583 -0.63383  
C -2.94928 0.01537 -0.55626  
H -3.94411 -0.41009 -0.34327  
H 3.81381 -0.26496 0.14149  
O 0.36514 2.75152 0.77257  
C 2.80105 0.05463 0.43921  
H -2.11454 -2.10214 0.64820  
N -2.11324 0.00630 0.68933  
H 2.06209 -1.94209 0.82267  
H 2.90171 1.01196 0.96538  
H -2.49707 0.05741 1.03108  
C 2.17194 -0.98418 1.34667  
C -2.29590 -1.30784 1.38514  
H 0.17552 -2.53558 1.51858  
H -3.35377 -1.38175 1.69288  
C -2.59160 1.0841 1.56738  
H -3.64452 0.94213 1.84858  
N 0.81067 -0.55306 1.79695  
H 2.82195 -1.16238 2.21999  
C 0.07769 -1.76082 2.29257  
H 0.19634 1.31248 2.54215  
C -1.40085 -1.54395 2.59966  
H -1.98692 1.16498 2.47704  
H -1.75963 -2.47195 3.06932  
C 0.95914 0.43193 2.90334  
H 0.59047 -2.13084 3.19844  
H -0.02291 0.76359 3.25330  
H -1.54286 -0.76512 3.36132  
H 1.50373 -0.02646 3.74664  
O -0.45726 2.43480 -0.24897

51  
2<sup>Mn</sup> No O<sub>2</sub> (1)  
Mn -0.07226 0.00467 -0.06409  
H 1.73995 -1.38824 -3.79456  
H -0.63935 -1.18455 -3.82342  
H -1.72346 0.94981 -3.60731  
H 1.39520 0.30243 -3.52561  
C 1.32244 -0.68800 -3.05455  
H -0.18826 1.57236 -2.94164  
H -0.13244 -1.09609 -2.84296  
C -1.14538 1.11427 -2.67993  
H -2.87874 -0.81186 -2.62801  
H 1.65759 1.84533 -2.08803  
H -0.15989 -2.08507 -2.36296  
H 3.27402 -0.64958 -2.12806  
H -1.68742 1.81676 -2.03858  
N -0.92741 -0.17635 -1.97351  
H 3.32562 1.65047 -1.48194  
C 2.21825 -0.77825 -1.82088  
C -2.25383 -0.82010 -1.71565  
H -2.06321 -1.86863 -1.45134  
C 2.25583 1.58255 -1.21177  
H 2.12329 -1.78125 -1.38084  
H -3.20172 0.92403 -0.87428  
N 1.92538 0.21374 -0.73743  
H 0.03661 2.30280 -0.41536  
C -2.96129 -0.10586 -0.58423  
H -3.91570 -0.60418 -0.34482  
H 3.79787 -0.46790 0.08730  
C 2.82136 -0.08698 0.43083  
H -2.15721 -2.14595 0.77417  
N -2.07345 -0.04702 0.62635  
H 2.00784 -0.04297 0.84531  
H 3.01398 0.85606 0.95660  
H -2.30516 2.04991 0.81083  
C 2.15353 -1.08145 1.35555  
C -2.30692 -1.28361 1.43922  
H 0.14287 -2.56519 1.69600  
H -3.36718 -1.28968 1.75746  
C -2.46812 1.15008 1.41460  
H -3.53403 1.09103 1.70183  
N 0.80034 -0.57762 1.75232  
H 2.78016 -1.26325 2.24812  
C 0.05938 -1.71165 2.38416  
H 1.47966 1.37278 2.28553  
C -1.41489 -1.44175 2.66883  
H -1.86622 1.23232 3.22299  
H -1.79413 -2.31746 3.21780  
C 0.96444 0.52117 2.74099  
H 0.57334 -1.98852 3.32508  
H -0.01147 0.86859 3.08999

H -1.53935 -0.59662 3.35984  
H 1.54755 0.16794 3.61082  
51  
2<sup>Mn</sup> No O<sub>2</sub> (3)  
Mn -0.07219 -0.01261 -0.06622  
H 1.74232 -1.36654 -3.80996  
H -0.63666 -1.15642 -3.83999  
H -1.74107 0.97072 -3.58707  
H 1.40052 0.32111 -3.52306  
C 1.32514 -0.67404 -3.06229  
H -0.19537 1.58234 -2.93551  
C -0.13052 -1.08203 -2.85781  
C -1.15036 1.12398 -2.66598  
H -2.87281 -0.82006 -2.63728  
H 1.64652 1.83909 -2.07221  
H -0.15933 -2.07695 -2.39040  
H 3.27571 -0.64738 -2.13327  
H -1.68103 1.82117 -2.00919  
N -0.92640 -0.17411 -1.97689  
H 3.31289 1.65758 -1.45673  
C 2.21959 -0.77972 -1.82880  
C -2.24923 -0.82878 -1.72378  
H -2.04979 -1.87664 -1.46339  
C 2.24212 1.57540 -1.19458  
H 2.12292 -1.78740 -1.39983  
H -3.21879 0.90038 -0.87567  
N 1.92439 0.19898 -0.73528  
H 2.00695 2.28567 -0.39359  
C -2.96347 -0.12708 -0.58949  
H -3.91062 -0.63843 -0.34968  
H 3.79420 -0.49879 0.08434  
C 2.82311 -0.10708 0.43062  
H -2.15599 -2.15784 0.79243  
N -2.07270 -0.06180 0.61973  
H 1.99286 -2.05336 0.85163  
H 3.02786 0.83524 0.95300  
H -2.97518 2.03921 0.78362  
C 2.14850 -1.09207 1.35970  
C -2.30858 -1.28767 1.44667  
H 0.14046 -2.56206 1.72458  
H -3.36956 -1.29001 1.76282  
C -2.45403 1.14744 1.39492  
H -3.52149 1.10482 1.67902  
N 0.79948 -0.57552 1.75687  
H 2.77450 -1.27613 2.25249  
C 0.05636 -1.70034 2.40233  
H 1.47120 1.38552 2.26025  
C -1.41869 -1.42831 2.68006  
H -1.85336 1.22980 2.30394  
H -1.79785 -2.29726 2.34004  
C 0.97173 0.53317 2.73207  
H 0.56877 -1.96537 3.34767  
H -0.00095 0.87564 3.09511  
H -1.54676 -0.57483 3.36015  
H 1.57265 0.19283 3.59465

51  
2<sup>Mn</sup> No O<sub>2</sub> (5)  
Mn -0.07940 0.22170 -0.03376  
H 1.73164 -1.41190 -3.57528  
H -0.61846 -1.27374 -3.82743  
H -1.75275 0.87664 -3.75611  
H 1.38298 0.28000 -3.51876  
C 1.30955 -0.70172 -3.02970  
H -0.24990 1.55532 -3.06316  
C -0.15259 -1.11597 -2.83474  
C -1.20712 1.08447 -2.81724  
H -2.95223 -0.82683 -2.58554  
H 1.88769 1.88906 -2.17950  
H -0.18277 -2.07896 -2.30346  
H 3.27364 -0.75364 -2.12792  
H -1.78316 1.80196 -2.22193  
N -0.98484 -0.16243 -2.05139  
H 3.55281 1.55186 -1.62307  
C 2.21702 -0.77484 -1.79655  
C -2.28690 -0.79089 -1.70265  
H -2.08435 -1.82979 -1.40958  
C 2.49220 1.60180 -1.31260  
H 2.05614 -1.74134 -1.29789  
H -3.21960 0.98234 -0.88246  
N 2.03902 0.29983 -0.77094  
H 2.37519 2.37432 -0.54381  
C -3.00101 -0.04800 -0.57518  
H -3.97155 -0.53718 -0.37551  
H 3.84785 -0.41656 0.13009  
C 2.85749 -0.03136 0.43342  
H -2.07027 -2.07705 0.69376  
N -2.19349 0.02591 0.67807  
H 2.01679 -1.99424 0.81079  
H 3.03413 0.90491 0.97784  
H -2.65294 2.07028 0.95830

C 2.18270 -1.05125 1.34832  
C -2.30039 -1.27485 1.40924  
H 0.16385 -2.54430 1.64911  
H -3.35683 -1.40560 1.71430  
C -2.71650 1.12934 1.51697  
H -3.76925 0.94418 1.80221  
N 0.85965 -0.57937 1.83726  
H 2.85654 -1.27321 2.19689  
C 0.07947 -1.72554 2.37873  
H 1.58328 1.32012 2.45740  
C -1.40305 -1.44232 2.64067  
H -2.12041 1.23271 2.42917  
H -1.78996 -2.32028 3.18016  
C 1.03885 0.46415 2.87179  
H 0.55129 -2.07284 3.31892  
H 0.06626 0.82835 3.21951  
H -1.52846 -0.60394 3.33960  
H 1.60015 0.06416 3.73641

51  
2<sup>Mn</sup> No O<sub>2</sub> (7)  
Mn -0.08859 0.76554 0.02946  
H 1.68777 -1.50038 3.71614  
H -0.64729 -1.41433 -3.61497  
H -1.63142 0.71462 -3.79104  
H 1.35328 0.20394 -3.53217  
C 1.31418 -0.75546 -2.99758  
H -0.23405 1.54941 -3.04020  
C -0.12476 -1.15525 -2.67497  
C -1.17774 1.03324 -2.83502  
H -2.88760 -0.84191 -2.51305  
H 2.09075 1.84168 -2.34345  
H -0.11406 -2.06337 -2.05359  
H 3.32145 -0.75458 -2.18535  
H -1.84429 1.74981 -2.34250  
N -0.94649 -0.13786 -1.95329  
H 3.70104 1.51560 -1.64055  
C 2.27949 -0.77289 -1.81284  
C -2.25645 -0.76220 -1.61010  
H -2.05480 -1.78814 -1.27401  
C 2.62192 1.59838 -1.41642  
H 2.15109 -1.72287 -1.27630  
H -3.16774 1.04643 -0.84727  
N 2.10684 0.33753 -0.83663  
H 2.45889 2.41915 -0.70608  
C -3.00610 0.00604 -0.53306  
H -0.00597 -0.44326 -0.39087  
H 3.88284 -0.31232 0.16787  
C 2.86398 0.04253 0.40853  
H -2.22366 -2.06569 0.69485  
N -2.26073 0.03909 0.75265  
H 2.01844 -1.92336 0.72118  
H 2.97895 0.98775 0.95687  
H -2.70006 2.07652 1.10909  
C 2.16308 -0.98896 1.27908  
C -2.37852 -1.27477 1.44160  
H 0.08196 -2.45882 1.36161  
H -3.41536 -1.38652 1.81175  
C -2.83066 1.10624 1.60584  
H -3.90518 0.93031 1.79221  
H 2.08235 -0.53250 1.74530  
H 2.80277 -1.23242 2.14576  
C 0.05303 -1.73427 2.18891  
H 1.62090 1.25089 2.57862  
C -1.40091 -1.49711 2.59426  
H -2.31037 1.14405 2.56959  
H -1.73005 -2.41141 3.11040  
C 0.99333 0.40583 2.88242  
H 0.59197 -2.19410 3.03844  
H 0.02537 0.81105 3.19645  
H -1.48008 -0.69974 3.34586  
H 1.46565 -0.10762 3.73961

53  
2<sup>Mn</sup> Side-on (1)  
Mn -0.08343 0.51270 -0.01008  
H 1.68403 -1.70451 -3.55800  
H -0.69694 -1.52459 -3.50667  
H -1.40268 0.63884 -3.80474  
H 1.32780 0.00673 -3.57872  
C 1.28735 -0.88584 -2.93941  
H -0.08462 1.50290 -2.95275  
C -0.14778 -1.25071 -2.58813  
C -1.04198 0.99449 -2.82591  
H -2.02325 -0.64016 -2.52546  
H 1.83767 1.78864 -2.38999  
H 1.15747 -2.12878 -1.92529  
H 3.25746 -0.66774 -2.07852  
H -1.75294 1.71975 -2.42077  
N -0.90870 -0.16498 -1.89701  
H 3.44237 1.62148 -1.63049  
C 2.21252 -0.76753 -1.73685

C -2.28626 -0.67548 -1.61222  
H -2.20412 -1.73146 -1.32430  
C 2.35725 1.64390 -1.43798  
H 2.15017 -1.70149 -1.16400  
H -3.00175 1.19710 -0.80522  
N 1.93432 0.36864 -0.79820  
H 2.10844 2.46854 -0.76296  
C -2.92210 0.14341 -0.51119  
H -3.94072 -0.22145 -0.29656  
H 3.80882 -0.08349 0.13542  
O 0.35428 2.19972 0.74319  
C 2.77471 0.17240 0.42144  
H -2.20861 -2.01681 0.58837  
N -2.08380 0.08897 0.72540  
H 2.15960 -1.87525 0.77387  
H 2.80562 1.13081 0.95393  
H -2.35072 2.12739 1.20033  
C 2.18338 -0.91058 1.29574  
C -2.30442 -1.24921 1.36648  
H 0.12908 -2.50456 1.23928  
H -3.34952 -1.27905 1.71951  
C -2.56943 1.15290 1.64609  
H -3.65480 1.04227 1.80441  
N 0.78054 -0.55353 1.67804  
H 2.79614 -1.05228 2.20062  
C 0.08095 -1.80869 2.09007  
H 1.52183 1.20284 2.62446  
C -1.36749 -1.60810 2.51047  
H -2.06922 1.08171 2.61647  
H -1.72152 -2.56737 2.91592  
C 0.85740 0.36530 2.85058  
H 0.64895 -2.26472 2.92049  
H -0.12482 0.77722 3.08791  
H -1.44689 -0.89313 3.34052  
H 1.24632 -0.18606 3.72221  
O -0.59550 2.26046 -0.33876

53  
**2<sup>Mn</sup> Side-on (3)**  
Mn -0.08333 0.49125 -0.00622  
H 1.69747 -1.67068 -3.57252  
H -0.68781 -1.52829 -3.51684  
H -1.43175 0.62800 -3.79345  
H 1.31465 0.03560 -3.57181  
C 1.28811 -0.86569 -2.94437  
H -0.09965 1.48586 -2.95725  
C -0.14153 -1.25568 -2.59640  
C -1.05633 0.98001 -2.81872  
H -2.90069 -0.68344 -2.52428  
H 1.81451 1.82903 -2.34629  
H -0.13909 -2.13987 -1.94154  
H 3.25556 -0.63242 -2.08417  
H -1.75925 1.70572 -2.40104  
N -0.91246 -0.18388 -1.89674  
C 3.42924 1.64322 -1.60914  
C 2.21270 -0.74768 -1.74180  
C -2.28547 -0.70295 -1.60988  
H -2.19532 -1.75496 -1.30912  
C 2.34626 1.66270 -1.40477  
H 2.16293 -1.68836 -1.17870  
H -0.31308 1.17600 -0.82899  
N 1.92965 0.37530 -0.78648  
H 2.10546 2.47332 -0.71037  
C -2.92620 0.12746 -0.51992  
H -3.94126 -0.24081 -0.29597  
H 3.80890 -0.10094 0.12729  
O 0.28553 2.16769 0.79174  
C 2.77897 0.15699 0.42530  
H -2.22899 -2.00926 0.60877  
N -2.08258 0.09643 0.71574  
H 2.15313 -1.89282 0.75499  
H 2.82006 1.10744 0.97108  
H -2.33830 2.14437 1.14908  
C 2.18558 -0.93436 1.28818  
C -2.30918 -1.23155 1.37853  
H 0.11203 -2.51534 1.24711  
H -3.35170 -1.24455 1.73944  
C -2.56030 1.18061 1.61638  
H -3.64535 1.07680 1.78084  
N 0.78709 -0.56935 1.67502  
H 2.79976 -1.08977 2.18988  
C 0.07528 -1.81432 2.09442  
H 1.53576 1.19142 2.60744  
C -1.36897 -1.59087 2.51968  
H -2.05460 1.12794 2.58494  
H -1.73363 -2.54187 2.93511  
C 0.87408 0.35435 2.84358  
H 0.64034 -2.27327 2.92498  
H -0.10612 0.76612 3.08847  
H -1.43508 -0.86816 3.34399  
H 1.27173 -0.19380 3.71321  
O -0.53038 2.27289 -0.39737

53  
**2<sup>Mn</sup> Side-on (5)**  
Mn -0.08604 0.64954 0.01753  
H 1.68702 -1.50344 -3.70948  
H -0.63474 -1.52730 -3.47145  
H -1.55573 0.59096 -3.77601  
H 1.29719 0.19215 -3.54464  
C 1.32369 -0.75548 -2.98904  
H -0.22828 1.51956 -3.00901  
C -0.07912 -1.19643 -2.57606  
C -1.15614 0.97324 -2.82194  
H -2.83417 -0.89635 -2.48058  
H 2.03677 1.90187 -2.29992  
H -0.00881 -2.06153 -1.89981  
H 3.36008 -0.58839 -2.27110  
H -1.87415 1.67418 -2.38630  
N -0.91718 -0.16197 -1.88663  
H 3.65517 1.63642 -1.59148  
C 2.34250 -0.70962 -1.85503  
C -2.23521 -0.79074 -1.56063  
H -2.03484 -1.80501 -1.19051  
C 2.57241 1.66136 -1.37484  
H 2.32553 -1.67946 -1.34006  
H -3.16030 1.03927 -0.86547  
N 2.11317 0.35857 -0.84306  
H 2.36354 2.44690 -0.64013  
C -3.00592 0.00781 -0.52316  
H -4.00714 -0.43792 -0.38333  
H 3.88362 -0.31975 0.15810  
O 0.18179 2.29108 0.85716  
C 2.86543 0.03632 0.39663  
H -2.37013 -2.04216 0.75101  
N -2.26667 0.06216 0.76393  
H 1.98454 -1.92696 0.62750  
H 2.97725 0.96417 0.97252  
H -2.61114 2.12386 1.07174  
C 2.13924 -1.01506 1.21900  
C -2.43610 -1.22861 1.48607  
H -0.01269 -2.43799 1.23762  
H -3.45745 -1.26464 1.90862  
C -2.79305 1.17431 1.58721  
H -3.87641 1.05209 1.76487  
N 0.79364 -0.54367 1.67545  
H 2.74798 -1.29926 2.09355  
C 0.00994 -1.75032 2.09636  
H 1.66119 1.17102 2.58745  
C -1.41323 -1.49144 2.58600  
H -2.28247 1.20114 2.55595  
H -1.73570 -2.40593 3.10556  
C 0.98157 0.35514 2.84930  
H 0.58108 -2.25441 2.89637  
H 0.02862 0.79703 3.15267  
H -1.43445 -0.70283 3.35006  
H 1.40491 -0.21593 3.69211  
O -0.44421 2.42402 -0.41967

53  
**2<sup>Mn</sup> Side-on (7)**  
Mn -0.08687 0.55035 0.00584  
H 1.71124 -1.48184 -3.72074  
H -0.63125 -1.40343 -3.68840  
H -1.65513 0.69808 -3.84777  
H 1.36280 0.21751 -3.52767  
C 1.31203 -0.74778 -3.00475  
H -0.27289 1.54774 -3.09109  
C -0.13477 -1.15815 -2.73075  
C -1.21022 1.01967 -2.88933  
H -2.92146 -0.85323 -2.53956  
H 1.98407 1.86401 -2.27489  
H -0.13740 -2.07623 -2.12394  
H 3.29770 -0.75272 -2.14486  
H -1.88821 1.72550 -2.39977  
N -0.96804 -0.15062 -2.01080  
C 3.62291 1.51966 -1.65409  
C 2.24800 -0.77652 -1.79610  
C -2.27125 -0.77824 -1.65003  
H -2.06511 -1.80594 -1.32131  
C 2.55646 1.60004 1.37874  
H 2.10863 -1.73144 -1.27045  
H -3.17662 1.02694 -0.87100  
N 2.06470 0.32461 -0.80456  
H 2.43321 2.40233 -0.64313  
C -2.99859 -0.00950 -0.55543  
H -3.98894 -0.46683 -0.38168  
H 3.86392 -0.33695 0.15119  
O 0.24737 2.56569 0.79714  
C 2.85419 0.01925 0.42323  
H -2.16179 -2.06871 0.68356  
N -2.22055 0.03756 0.71579  
H 2.01895 -1.95114 0.75046  
H 2.98638 0.95992 0.97370  
H -2.69581 2.07386 1.04553

C 2.17477 -1.01769 1.30743  
C -2.34275 -1.27309 1.41950  
H 0.10607 -2.49001 1.43950  
H -3.38941 -1.38445 1.75968  
C -2.77098 1.11601 1.57192  
H -3.82935 0.91982 1.81848  
N 0.84470 -0.55878 1.80041  
H 2.83663 -1.26145 2.15721  
C 0.06298 -1.74794 2.25053  
H 1.66782 1.21843 2.62110  
C -1.40043 -1.48283 2.60485  
H -2.20282 1.18838 2.50551  
H -1.76022 -2.38041 3.12958  
C 1.03768 0.37972 2.93269  
H 0.57224 -2.19477 3.12495  
H 0.07702 0.78953 3.26138  
H -1.49090 -0.66873 3.33701  
H 1.51712 -0.13621 3.78367  
O -0.53143 2.67258 -0.29997

53  
**2<sup>Mn</sup> End-on (1)**  
Mn -0.07332 0.29729 -0.04276  
H 1.65047 -1.72842 -3.56711  
H -0.70801 -1.38097 -3.59798  
H -1.60666 0.92304 -3.65588  
H 1.42144 0.00292 -3.54468  
C 1.29350 -0.90157 -2.93531  
H -0.01247 1.44876 -3.04740  
C -0.17599 -1.18383 -2.65127  
C -1.01229 1.12340 -2.75033  
H -9.22447 -0.51767 -2.57432  
H 1.83843 1.71423 -2.36452  
H -0.25559 -2.09778 -2.04257  
H 2.34970 -0.86426 -2.00981  
H -1.46681 1.92836 -2.15949  
H -0.92250 -0.10761 -1.91845  
H 3.47534 1.45697 -1.70397  
C 2.18968 -0.87673 -1.70122  
C -2.30976 -0.61978 -1.66608  
H -2.23793 -1.69200 -1.44350  
C 2.40559 1.53245 -1.44818  
H 2.03074 -1.80312 -1.13102  
H -3.01735 1.19763 -0.74428  
N 1.95694 0.28201 -0.77949  
H 2.24576 2.37630 -0.77114  
C -2.92952 -1.02882 -0.51206  
H -3.94019 -0.25796 -0.29751  
H 3.83842 -0.17688 0.15058  
O -0.03162 2.01613 0.05262  
C 2.81417 0.11548 0.43732  
H -0.58108 -2.25441 2.89637  
N -2.06118 0.02010 0.70288  
H 2.18578 -1.89710 0.90074  
H 2.87982 1.09572 0.92662  
H -2.35461 2.03596 1.23379  
C 2.21519 -0.90711 1.37197  
C -2.24006 -1.33870 1.30957  
H 0.25721 -2.53019 1.43118  
H -3.30149 -1.45086 1.59118  
C -2.55247 1.04724 1.66415  
H -3.63304 0.90895 1.83576  
N 0.80857 -0.52410 1.72783  
H 2.25532 -1.03398 2.28460  
C 0.12243 -1.76721 2.21254  
H 1.42423 1.36405 2.47993  
C -1.36031 -1.62372 2.52215  
H -2.03907 0.96195 2.62543  
H -1.68808 -2.59097 2.93083  
C 0.85871 0.49004 2.81643  
H 0.65973 -2.12353 3.10888  
H -0.14805 0.82061 3.08074  
H -1.53246 -0.89554 3.32578  
H 1.34466 0.05942 3.70756  
O -1.06058 2.89641 -0.15547

53  
**2<sup>Mn</sup> End-on (5)**  
Mn -0.06774 0.48368 0.03946  
H 1.71045 -1.59878 -3.61977  
H -0.64927 -1.38552 -3.69348  
H -1.67377 0.81714 -3.75954  
H 1.40444 0.11591 -3.51497  
C 1.30338 -0.82305 -2.95406  
H -0.12951 1.45664 -3.12625  
H -0.16349 -1.18001 -2.72148  
C -1.11085 1.06436 -2.84249  
H -2.96104 -0.66295 -2.52226  
H 1.94291 1.80879 -2.27886  
H -0.21854 -2.10648 -2.13010  
H 3.25176 -0.84962 -2.02146  
H -1.62920 1.85213 -2.28294

N -0.95019 -0.14381 -1.99593  
H 3.58497 1.47036 -1.65635  
C 2.19169 -0.82856 -1.71077  
C -2.29072 -0.68585 -1.64542  
H -2.16800 -1.74177 -1.36969  
C 2.52153 1.57203 -1.38128  
H 2.00388 -1.75596 -1.15255  
H -3.02512 1.15898 -0.78044  
N 2.03029 0.31901 -0.75712  
H 2.40587 2.39870 -0.67273  
C -2.92882 0.09909 -0.50859  
H -3.94339 -0.28550 -0.30984  
H 3.87136 -0.27843 0.15987  
O -0.14564 2.31183 -0.14173  
C 2.85982 0.04785 0.45628  
H -2.05631 -2.05842 0.59796  
N -2.11857 0.04762 0.74888  
H 2.15691 -1.96847 0.83920  
H 2.97534 0.99750 0.99515  
H -2.45463 2.07705 1.20471  
C 2.22676 -1.00217 1.35422  
C -2.25871 -1.30701 1.37299  
H 0.20673 -2.57941 1.46818  
H -3.31497 -1.42858 1.67069  
C -2.63782 1.09621 1.66567  
H -3.71853 0.95248 1.83259  
N 0.84907 -0.60471 1.76599  
H 2.86047 -1.15670 2.24369  
C 0.11663 -1.81259 2.25132  
H 1.52986 1.26948 2.51324  
C -1.35820 -1.58866 2.57349  
H -2.12917 1.04934 2.63425  
H -1.72232 -2.52635 -3.01869  
C 0.94085 0.41036 2.85096  
H 0.63330 -2.19764 3.14875  
H -0.05437 0.77051 3.12759  
H -1.48537 -0.83138 3.35889  
H 1.42325 -0.02657 3.74177  
O -1.27085 3.05944 -0.33336

51  
**2<sup>Fe</sup> No O<sub>2</sub> (2)**  
Fe -0.07226 0.00323 -0.06362  
H 1.74425 -1.43228 -3.77988  
H -0.64310 -1.19930 -3.79321  
H -1.69230 0.94803 -3.58117  
H 1.40443 0.26590 -3.55021  
C 1.33174 -0.71310 -3.05559  
H -0.14404 1.55615 -2.93712  
C -0.12005 -1.11028 -2.82120  
C -1.10366 1.11312 -2.66108  
H -2.85159 -0.78406 -2.61495  
H 1.62054 1.83093 -2.11441  
H -0.14847 -2.09460 -2.33273  
H 3.27574 -0.61699 -2.12157  
H -1.62967 1.82694 -2.01950  
N -0.89880 -0.17858 -1.94936  
H 3.27074 1.68675 -1.45449  
C 2.22231 -0.77375 -1.81962  
C -2.23204 -0.80668 -1.69891  
H -0.65332 -1.42571 -3.60038  
C 2.19567 1.58818 -1.21731  
H 2.15057 -1.77580 -1.37362  
H -3.13883 0.95593 -0.86016  
N 1.88499 0.21250 -0.74447  
H 1.92858 2.30431 -0.43170  
C -2.92355 -0.07975 -0.57121  
H -3.88951 -0.55415 -0.33072  
H 3.77019 -0.41790 0.08429  
C 2.78399 -0.06094 0.42479  
H -2.18715 -2.13968 0.76984  
N -2.03273 -0.04796 0.63529  
H 2.00636 -2.03079 0.83537  
H 2.95238 0.88634 0.95125  
H -2.18832 2.05401 0.83424  
C 2.13304 -1.06612 1.34333  
C -2.31153 -1.27863 1.44128  
H 0.13483 -2.57001 1.66704  
H -3.37054 -1.25528 1.76307  
C -2.41177 1.15703 1.42288  
H -3.48872 1.13892 1.67032  
N 0.77285 -0.57715 1.27246  
H 2.75308 -1.23317 2.24367  
C 0.04921 -1.72165 2.36065  
H 1.42019 1.38482 2.26034  
C -1.42138 -1.46707 2.66476  
H -1.84518 1.20699 2.35605  
H -1.79492 -2.35636 3.19514  
C 0.92240 0.52426 2.71756  
H 0.57889 -1.99465 3.29423  
H -0.05597 0.85360 3.07488  
H -1.54314 -0.63782 3.37555

H 1.51665 0.17727 3.58179  
51  
**2<sup>Fe</sup> No O<sub>2</sub> (4)**  
Fe -0.07442 0.14678 -0.04698  
H 1.73609 -1.40894 -3.74668  
H -0.62704 -1.24066 -3.82583  
H -1.74570 0.94033 -3.64131  
H 1.37856 0.28069 -3.50602  
C 1.30682 -0.70228 -3.01925  
H -0.19551 1.53130 -2.97853  
C -0.15331 -1.12070 -2.83052  
C -1.16165 1.09163 -2.71461  
H -2.93719 -0.81322 -2.59439  
H 1.83261 1.88688 -2.14969  
H -0.18411 -2.10190 -2.33370  
H 3.26484 -0.73955 -2.10774  
H -1.68945 1.80975 -2.07696  
N -0.96639 -0.19192 -2.00279  
H 3.50295 1.58237 -1.59280  
C 2.20586 -0.77064 -1.78201  
C -2.28651 -0.80217 -1.69872  
H -2.10940 -1.84846 -1.41427  
C 2.44053 1.60576 -1.28349  
H 2.05126 -1.74087 -1.28826  
H -3.21961 0.97411 -0.88865  
N 2.01158 0.29430 -0.75002  
H 2.31043 2.37210 -0.51032  
C -2.99525 -0.05320 -0.57531  
H -3.96375 -0.54135 -0.36067  
H 3.84404 -0.41476 1.12228  
C 2.85425 -0.03559 0.43681  
H -2.07728 -2.05867 0.68891  
N -2.16065 0.02651 0.65890  
H 2.05356 -2.01461 0.82363  
H 3.03247 0.98824 0.98496  
H -2.57665 2.08123 0.92176  
C 2.18542 -1.05866 1.34807  
C -2.29073 -1.26559 1.40070  
H 0.16868 -2.57498 1.66714  
H -3.34980 -1.37629 1.70721  
C -2.65211 1.14721 1.49092  
H -3.70653 0.99219 1.78993  
N 0.83935 -0.59847 1.77840  
H 2.83902 -1.25004 2.22073  
C 0.08144 -1.73223 2.36897  
H 1.48708 1.35590 2.31587  
C -1.39914 -1.44909 2.63130  
H -2.04517 1.24903 2.39602  
H -1.79038 -2.33182 3.16078  
C 0.97578 0.49705 2.76485  
H 0.56318 -2.04328 3.31797  
H -0.01019 0.83533 3.09799  
H -1.52456 -0.61890 3.34016  
H 1.55232 0.16001 3.64617

51  
**2<sup>Fe</sup> No O<sub>2</sub> (6)**  
Fe -0.08717 0.66139 0.01517  
H 1.69460 -1.54624 -3.69875  
H -0.65332 -1.42571 -3.60038  
H -1.59216 0.72961 -3.77057  
H 1.35908 0.16313 -3.55744  
C 1.31875 -0.78333 -3.00707  
H -0.17612 1.53283 -3.02400  
C -0.11846 -1.17226 -2.66603  
C -1.12964 1.03757 -2.81571  
H -2.87067 -0.80418 -2.50919  
H 2.00540 1.84166 -2.34568  
H -0.11172 -2.07625 -2.03936  
H 3.31845 -0.72200 -2.17298  
H -1.77976 1.76522 -2.31832  
N -0.91961 -0.14245 -1.93908  
H 3.62048 1.56001 -1.63478  
C 2.27445 -0.77244 -1.81093  
C -2.24174 -0.74479 -1.60363  
H -2.06015 -1.77584 -1.27295  
C 2.53891 1.61366 -1.41665  
H 2.16733 -1.72290 1.27143  
H -1.35611 1.08183 -0.82992  
N 2.06215 0.33586 -0.83809  
H 2.34799 2.42660 -0.70461  
C -2.96993 0.03546 -0.52444  
H -3.97848 -0.38938 -0.37408  
H 3.85401 -0.26642 0.16298  
C 2.82949 0.06606 0.40774  
H -2.23631 -2.06528 0.68900  
N -2.21449 0.03938 0.75716  
H 2.02262 -1.91500 0.72393  
H 2.92351 1.01577 0.95146  
H -2.57684 2.08910 1.13150  
C 2.14703 -0.67493 1.27634

C -2.37140 -1.27506 1.43962  
H 0.08467 -2.47364 1.35513  
H -3.41188 -1.35523 1.80576  
C -2.75070 1.12022 1.61698  
H -3.83336 0.98038 1.78607  
N 0.79392 -0.53587 1.72611  
H 2.78019 -1.19850 2.15263  
C 0.04909 -1.74822 2.18083  
H 1.56060 1.27011 2.54075  
C -1.40350 -1.52676 2.59213  
H -2.24393 1.12603 2.58785  
H -1.73375 -2.45511 3.08149  
C 0.94373 0.42057 2.85256  
H 0.60114 -2.19195 3.03020  
H -0.03176 0.81476 3.15478  
H -1.48640 -0.74925 3.36378  
H 1.41741 -0.07555 3.71877

53

<sup>25</sup>Fe Side-on (2)

Fe -0.08127 0.41839 -0.01192  
H 1.70560 -1.71015 -3.54759  
H -0.69335 -1.57188 -3.49448  
H -1.38664 0.59978 -3.79136  
H 1.29634 -0.01056 -3.59739  
C 1.28392 -0.89326 -2.94349  
H -0.06981 1.46359 -2.93748  
C -0.13976 -1.29043 -2.58099  
C -1.02623 0.95521 -2.81242  
H -2.89778 -0.66529 -2.50580  
H 1.81099 1.82028 -2.37723  
H -0.13125 -2.16696 -1.91633  
H 3.24279 -0.58019 -2.09470  
H -1.73710 1.67952 -2.40713  
N -0.89853 -0.20909 -1.88730  
H 3.39138 1.70048 -1.56054  
C 2.20625 -0.72664 -1.74566  
C -2.28005 -0.69521 -1.59330  
H -2.21312 -1.74697 -1.28731  
C 2.29993 1.68627 -1.40741  
H 2.19199 -1.66317 -1.17466  
H -2.95305 1.20992 -0.82796  
N 1.89502 0.39411 -0.79360  
H 1.99947 2.49601 -0.73610  
C -2.89445 -0.16292 -0.50853  
H -3.91795 -0.17636 -0.27769  
H 3.78044 -0.05726 0.11507  
O 0.27469 2.10480 0.77073  
C 2.74671 0.17985 0.41709  
H -2.24638 -1.97797 0.61126  
N -2.05052 -0.12294 0.72618  
H 2.15595 -1.88657 0.73031  
H 2.77244 1.12546 0.97159  
H -2.25688 2.17272 1.16613  
C 2.17534 -0.93194 1.27049  
C -2.30508 -1.20337 1.38535  
H 0.09553 -2.53330 1.23079  
C -3.34603 -1.19319 1.75064  
C -2.51732 1.21365 1.62283  
H -3.60833 1.14036 1.76240  
N 0.77462 -0.59061 1.66313  
H 2.79459 -1.08389 2.16939  
C 0.06830 -1.83640 2.08165  
H 1.52548 1.16610 2.60238  
H -1.37020 -1.59915 2.51826  
H -2.03778 1.13764 2.60300  
H -1.75019 -2.55098 2.91777  
C 0.85799 0.33275 2.83324  
H 0.63749 -2.30019 2.90679  
H -0.12007 0.74928 3.07607  
H -1.42054 -0.88995 3.35542  
H 1.24992 -0.22028 3.70209  
O -0.51710 2.22075 -0.39067

53

<sup>25</sup>Fe Side-on (4)

Fe -0.06355 0.64445 0.02037  
H 1.69468 -1.59356 -3.67723  
H -0.64388 -1.58929 -3.41935  
H -1.44392 0.56415 -3.76085  
H 1.27944 0.10311 -3.59362  
C 1.32473 -0.81568 -2.99279  
H -0.14540 1.49526 -2.95291  
C -0.06631 -1.24915 -2.54083  
C -1.07635 0.94610 -2.79377  
H -2.80346 -0.86191 -2.45760  
H 1.97814 1.90002 -2.33454  
H 0.01273 -2.10125 -1.84961  
H 3.35241 -0.53007 -2.29176  
H -1.80982 1.64517 -2.38272  
N -0.86980 -0.19172 -1.85153  
H 3.59146 1.67786 -1.60343

C 2.34532 -0.70011 -1.86939  
C -2.20790 -0.77320 -1.53304  
H -2.04531 -1.79196 -1.15817  
C 2.50638 1.68053 -1.39985  
H 2.38334 -1.66156 -1.34174  
H -3.07596 1.09288 -0.85865  
N 2.07281 0.36904 -0.86494  
H 2.27344 2.46602 -0.67264  
C -2.95883 0.05939 -0.50898  
H -3.97519 -0.35344 -0.37335  
H 3.85028 -0.27201 0.14250  
O 0.16510 2.24954 0.86499  
C 2.82486 0.06218 0.37966  
H -2.38960 -2.00402 0.74385  
N -2.22995 0.09696 0.78207  
H 1.96921 -1.91531 0.58621  
H 2.91527 0.98979 0.95909  
H -2.55615 2.15766 1.10810  
C 2.11181 -1.00769 1.18713  
C -2.43226 -1.19846 1.48816  
H -0.03793 -2.44951 1.20220  
H -3.45418 -1.21034 1.91072  
C -2.75427 1.20523 1.61105  
H -3.84106 1.09106 1.77289  
N 0.76067 -0.55548 1.64246  
H 2.72066 -1.29297 2.06135  
C -0.00318 -1.77034 2.06676  
H 1.63224 1.14940 2.57332  
C -1.41659 -1.51169 2.57868  
H -2.25728 1.21297 2.58742  
H -1.75111 -2.43861 3.06775  
C 0.94557 0.33611 2.82354  
H 0.58168 -2.27654 2.85617  
H -0.00657 0.78056 3.12395  
H -1.42176 -0.74838 3.36843  
H 1.36051 -0.24323 3.66480  
O -0.54878 2.42362 -0.33935

53

<sup>25</sup>Fe Side-on (6)

Fe -0.08460 0.56624 0.00387  
H 1.70707 -1.52674 -3.69087  
H -0.64672 -1.42724 -3.64999  
H -1.63459 0.68768 -3.82916  
H 1.35879 0.17869 -3.53889  
C 1.30742 -0.77426 -2.99483  
H -2.23006 1.52145 -3.09482  
C -0.13578 -1.17419 -2.70285  
C -1.17674 1.01774 -2.88075  
H -2.91504 -0.81154 -2.53620  
H 1.90186 1.85495 -2.27847  
H -0.13936 -2.08352 -2.08297  
H 3.28486 -0.72214 -2.11855  
H -1.83644 1.74239 -2.39438  
N -0.95372 -0.14807 -1.98978  
C 3.54126 1.55714 -1.63166  
H 2.33333 -0.77569 -1.78213  
C -2.27028 -0.75559 -1.64233  
H -2.08707 -1.78905 -1.31828  
C 2.46981 1.61462 -1.37460  
H 2.11472 -1.73167 -1.25370  
H -3.12856 1.06833 -0.85865  
N 2.01340 0.32561 -0.79536  
H 2.30905 2.41301 -0.64315  
C -2.97197 0.02765 -0.54788  
H -3.96674 -0.40854 -0.35279  
H 3.83966 -0.28170 0.14124  
O 0.17046 2.29902 0.86078  
C 2.82612 0.04978 0.42560  
H -2.18709 -2.05597 0.67487  
N -2.16644 0.05171 0.70837  
H 2.03701 -1.93660 0.75799  
H 2.93467 0.99633 0.96991  
H -2.55464 2.10225 1.03943  
C 2.17041 -0.99614 1.30850  
C -2.33376 -1.25545 1.41283  
H 0.10205 -2.48440 1.39983  
H -3.38258 -1.32307 1.75422  
C -2.67273 1.15130 1.56861  
H -3.73758 0.98965 1.80795  
N 0.82748 -0.55031 1.77948  
H 2.82349 -1.21971 2.16939  
C 0.06014 -1.75300 2.22069  
H 1.62296 1.23148 2.61528  
C -1.39819 -1.50169 2.59229  
H -2.10234 1.19967 2.50078  
H -1.75829 -2.41693 3.08521  
C 1.00116 0.38435 2.91299  
H 0.58473 -2.20434 3.08280  
H 0.03469 0.78054 3.24367  
H -1.48844 -0.71267 3.35091  
H 1.48179 -1.35999 3.76576

O -0.43222 2.43619 -0.42549

53

<sup>25</sup>Fe End-on (2)

Fe -0.08437 0.20430 -0.04213  
H 1.63839 -1.77889 -3.54686  
H -0.71427 -1.36358 -3.61064  
H -1.59458 0.94522 -3.67511  
H 1.44871 -0.04260 -3.56127  
C 1.29320 -0.93165 -2.93594  
H 0.00596 1.45771 -3.07844  
C -0.18389 -1.17522 -2.66129  
C -0.99427 1.14315 -2.77274  
H -2.92358 -0.45881 -2.58841  
H 1.77190 1.66090 -2.39486  
H -0.28710 -2.08587 -2.05150  
H 3.23593 -0.88011 -1.98419  
H -1.43214 1.95325 -2.17800  
N -0.91414 -0.04261 1.93412  
H 3.40224 1.46414 -1.70490  
C 2.17214 -0.90126 -1.69006  
C -2.30642 -0.58435 -1.68517  
H -2.24688 -1.66100 -1.48185  
C 3.23731 1.51400 -1.46664  
H 2.01199 -1.82629 -1.11791  
H -2.97896 1.22209 -0.72440  
N 1.91317 0.25963 -0.78156  
H 2.13050 2.36151 -0.80534  
C -2.90847 0.14771 -0.51516  
H -3.92192 -0.22729 -0.29638  
H 3.80737 -0.12315 1.14709  
O 0.34469 1.95579 0.19812  
C 0.77756 0.14668 0.43440  
H -2.01411 -2.11273 0.51836  
N -2.30500 -0.00071 0.68984  
H 2.18684 -1.86360 0.93662  
H 1.81525 1.14022 0.89862  
H -2.28076 2.01760 1.23419  
C 2.20712 -0.86555 1.39254  
C -2.22890 -1.35973 1.29039  
H 0.28135 -2.50200 1.42678  
H -3.29372 -1.46386 1.56025  
C -2.49111 1.03115 1.66300  
H -3.57189 0.90804 1.84083  
N 0.80025 -0.49190 1.75205  
H 2.82687 -0.93958 2.30060  
C 0.12701 -1.75117 2.21667  
H 1.37328 1.40290 2.50887  
C -1.36138 -1.64295 2.51203  
H -1.97200 0.93149 2.61832  
H -1.67450 -2.62175 2.90411  
C 0.84601 0.50722 2.85074  
H 0.66182 -2.11279 3.11205  
H -0.16284 0.80466 1.14419  
H -1.55870 -0.92798 3.32143  
H 1.36545 0.08278 3.72559  
O -0.96272 2.80728 -0.16182

53

<sup>25</sup>Fe End-on (6)

Fe -0.06100 0.42864 -0.00610  
H 1.71154 -1.58276 -3.68665  
H -0.64817 -1.37210 -3.67034  
H -1.70629 0.86181 -3.63284  
H 1.40203 0.12955 -3.55179  
C 1.32776 -0.81597 -2.99742  
H -0.11565 1.44227 -3.06670  
C -0.12575 -1.18533 -2.71493  
C -1.09010 1.06633 -2.74134  
H -2.87663 -0.78131 -2.53685  
H 1.92201 1.81596 -2.30268  
H -0.15541 -2.12292 -2.14055  
H 3.30552 -0.79013 -2.12309  
H -1.55840 1.84897 -2.13158  
N -0.91374 -0.17610 -1.94165  
H 3.56760 1.51797 -1.68019  
C 2.25397 -0.82156 -1.78354  
C -2.25033 -0.76145 -1.62874  
H -2.09103 -1.80503 -1.32571  
C 2.50067 1.57686 -1.40460  
H 2.11855 -1.76847 -1.24304  
H -3.10716 0.05773 -0.82998  
N 2.04708 0.29474 -0.81182  
H 2.35225 2.38204 -0.67797  
C -2.96080 0.01151 -0.53155  
H -3.96245 -0.42028 -0.36193  
H 3.86491 -0.31077 1.14624  
O -0.07171 2.25706 0.36320  
C 2.85113 0.03236 0.41624  
H -2.18548 -2.09144 0.67878  
N -2.17706 0.01595 0.73668  
H 2.07814 -1.95666 0.78703

H 2.96727 0.98554 0.94838  
H -2.52697 2.06852 1.10250  
C 2.18483 -0.99819 1.31073  
C -2.33548 -1.29837 1.42411  
H 0.13401 -2.51972 1.42174  
H -3.38062 -1.38111 1.77455  
C -2.69510 1.10591 1.59946  
H -3.77368 0.96609 1.78852  
N 0.81947 -0.56115 1.73542  
H 2.81204 -1.18250 2.19864  
C 0.07477 -1.76615 2.22043  
H 1.53627 1.29532 2.48097  
C -1.38675 -1.53989 2.59550  
H -2.17307 1.11274 2.56182  
H -1.72513 -2.46423 3.08660  
C 0.94577 0.44175 2.82759  
H 0.61645 -2.17142 3.09354  
H -0.03963 0.81324 3.12207  
H -1.48570 -0.75701 3.35964  
H 1.43969 -0.01124 3.70339  
O -0.88805 3.17549 -0.20920

51

<sup>25</sup>No O<sub>2</sub> (1)

Co -0.05072 -0.09639 -0.05900  
H 1.76208 -1.42056 -3.79319  
H -0.62865 -1.18299 -3.78630  
H -1.67240 0.95613 -3.56464  
H 1.42769 0.27725 -3.54786  
C 1.35304 -0.70627 -3.06238  
H -0.12583 1.56884 -2.39707  
C -0.09672 -1.09958 -2.81946  
C -1.08092 1.12059 -2.64735  
H -2.81347 -0.78267 -2.60169  
H 1.55039 1.81295 -2.04355  
H -0.12352 -2.08585 -2.33456  
H 3.29052 -0.59097 -2.11636  
H -1.60435 1.83064 -2.00017  
N -0.86351 -0.16857 -1.93461  
H 3.20577 1.70147 -1.39132  
C 2.23995 -0.78241 -1.82654  
C -2.19312 -0.80305 -1.68655  
H -2.01523 -1.85352 -1.42251  
C 2.13494 1.56213 -1.15605  
H 2.18976 -1.79779 -1.40852  
H -3.09083 0.95754 -0.83608  
N 1.87432 0.16278 -0.72534  
H 1.84692 2.24388 -0.34791  
C -2.88018 -0.08122 -0.55597  
H -3.84649 -0.55149 -0.31151  
H 3.76080 -0.48627 0.08276  
C 2.78358 -0.11764 0.43449  
H -2.22347 -2.14743 0.81861  
N -1.68450 1.79127 -2.22682  
H 1.97266 -2.07137 0.83432  
H 2.96925 0.82633 0.96021  
H -1.99210 2.04141 0.81514  
C 2.12101 -1.11387 1.35062  
C -2.30788 -1.26925 1.47387  
H 0.11315 -2.58400 1.68033  
H -3.36363 -1.19294 1.79695  
C -2.28914 1.16978 1.40880  
H -3.36993 1.22594 1.63078  
N 0.77291 -0.59755 1.73860  
H 2.73922 -1.30056 2.24781  
C 0.04364 -1.73698 2.37759  
H 1.46827 1.34349 2.27813  
C -1.42001 -1.46779 2.69566  
H -1.74303 1.19152 2.35437  
H -1.80227 -2.35182 3.22822  
C 0.95393 0.49308 2.73545  
H 0.57987 -0.01825 3.30411  
H -0.01493 0.84414 3.09721  
H -1.52813 -0.63505 3.40458  
H 1.54258 0.13095 3.59792

51

<sup>25</sup>No O<sub>2</sub> (3)

Co -0.05269 0.14412 -0.03024  
H 1.74995 -1.46466 -3.72715  
H -0.62372 -1.27336 -3.78513  
H -1.69712 0.92935 -3.61521  
H 1.39799 0.23213 -3.52102  
C 1.32627 -0.74056 -3.01415  
H -0.13130 1.50166 -2.97853  
C -0.13161 -1.14613 -2.79988  
C -1.10096 1.08260 -2.69689  
H -2.90167 -0.78373 -2.55741  
H 1.81255 1.86578 -2.15041  
H -0.16365 -2.11986 -2.28898  
H 3.28106 -0.72027 -2.09812  
H -1.60972 1.81715 -2.06315

N -0.92125 -0.19789 -1.97255  
H 3.47224 1.59450 -1.55167  
C 2.22201 -0.78289 -1.77671  
C -2.24955 -0.78209 -1.66279  
H -2.09280 -1.82996 -1.37285  
C 2.40242 1.59484 -1.26873  
H 2.09234 -1.75671 -1.28370  
H -3.11774 1.02495 -0.85361  
N 1.98523 0.27357 -0.74597  
H 2.23695 2.35655 -0.49769  
C -2.93121 -0.01043 -0.54190  
H -3.91673 -0.46148 -0.32463  
H 3.82911 -0.39876 0.12591  
C 2.83076 -0.04374 0.44063  
H -2.12499 -2.06677 0.70247  
N -2.09026 0.03329 0.68857  
H 2.04991 -2.03372 0.80148  
H 2.98711 0.88953 0.99642  
H -2.42229 2.10246 0.95888  
C 2.17570 -1.08385 1.33752  
C -2.28706 -1.25320 1.42326  
H 0.15125 -2.60491 1.62370  
H -3.34664 -1.30920 1.74287  
C -2.54755 1.16968 1.52133  
H -3.61219 1.05973 1.80309  
N 0.82910 -0.63425 1.77114  
H 2.82807 -1.28082 2.20974  
C 0.07820 -2.77929 2.34686  
H 1.47748 1.31095 2.34178  
C -1.39366 -1.49272 2.63955  
H -1.95338 1.23971 2.43794  
H -1.79137 -2.38858 3.14099  
C 0.96684 0.44512 2.77696  
H 0.57589 -2.11246 3.27986  
H -0.01724 0.77702 3.11986  
H -1.50130 -0.68558 3.37756  
H 1.54537 0.09144 3.65014

51

<sup>25</sup>No O<sub>2</sub> (5)

Co -0.06047 0.61789 0.02813  
H 1.69001 -1.59065 -3.67264  
H -0.65804 -1.43532 -3.54637  
H -1.52925 0.77584 -3.69709  
H 1.37011 0.12341 -3.54917  
C 1.32916 -0.81546 -2.98032  
H -0.08846 1.51865 -2.93673  
C -0.10519 -1.18769 -2.62131  
C -1.05748 1.05272 -2.57400  
H -2.84320 -0.75410 -2.50008  
H 1.98985 1.81273 -3.32283  
H -0.10101 -2.09167 -1.99447  
H 3.35351 -0.72685 -2.17120  
H -1.68450 1.79127 -2.22682  
N -0.88711 -0.14976 -1.88363  
H 3.60515 1.56074 -1.60293  
C 2.29527 -0.79659 -1.80105  
C -2.22892 -0.72649 -1.58337  
H -2.07911 -1.76793 -1.26851  
C 2.52114 1.59042 -1.39139  
H 2.20853 -1.75198 -1.26658  
H -3.06555 1.10644 -0.79824  
N 2.06960 0.30097 -0.82103  
H 3.30823 2.39538 -0.67629  
C -2.94508 0.05604 -0.50108  
H -3.95925 -0.35462 -0.34878  
H 3.86949 -0.29929 0.16974  
C 2.84557 0.03331 0.41687  
H -2.26381 -2.06590 0.69453  
N -2.17661 0.03553 0.76974  
H 2.04631 -1.95043 0.72888  
H 2.93947 0.98157 0.96268  
H -2.46172 2.09405 1.15259  
C 2.15815 -1.00688 1.27817  
C -2.36684 -1.27457 1.44899  
H 0.07774 -2.50001 1.3

53

<sup>20</sup>Co Side-on (1)

Co -0.07520 0.42850 0.00325  
 H 1.72961 -1.72317 -3.52045  
 H -0.68789 -1.60266 -3.47829  
 H -1.38019 0.57256 -3.75053  
 H 1.28038 -0.03453 -3.60187  
 C 1.28392 -0.90625 -2.93396  
 H -0.04041 1.41111 -2.91299  
 C -0.13008 -1.32779 -2.56489  
 C -1.00187 0.91741 -2.77438  
 H -2.87694 -0.69521 -2.48427  
 H 1.76752 1.88021 -2.31045  
 H -0.10805 -2.20854 -1.90720  
 H 3.22425 -0.52267 -2.08191  
 H -1.69461 1.65145 -2.35681  
 N -0.87954 -0.25570 -1.85660  
 H 3.36295 1.70946 -1.52889  
 C 2.19353 -0.70395 -1.73458  
 C -2.26277 -0.72458 -1.56882  
 H -2.21027 -1.77325 -1.25207  
 C 2.27478 1.71065 -1.35622  
 H 2.20926 -1.64045 -1.16612  
 H -2.91649 1.20095 -0.83589  
 N 1.86672 0.40680 -0.76864  
 H 2.00082 2.50539 -0.65700  
 C -2.86481 1.15912 -0.50029  
 H -3.88756 -0.16619 -0.25022  
 H 3.75978 -0.05428 0.11158  
 O 0.20146 2.10426 0.84218  
 C 2.72858 0.16486 0.43263  
 H -2.23878 -1.96692 0.61179  
 N -2.01149 0.13073 0.73109  
 H 2.15500 -1.91674 0.68624  
 H 2.75253 1.09416 1.01343  
 H -2.23533 2.18384 1.15241  
 C 2.16712 -0.97620 1.25029  
 C -2.28022 -1.19740 1.39026  
 H 0.08291 -2.58962 1.21940  
 H -3.32018 -1.16252 1.75491  
 C -2.48177 1.22702 1.62001  
 C -3.57055 1.13924 1.76441  
 N 0.76836 -0.64907 1.64040  
 H 2.78449 -1.14549 2.14794  
 C 0.06984 -1.89074 2.06818  
 H 1.51192 1.11300 2.58235  
 C -1.35980 -1.63215 2.51773  
 H -1.99428 1.16730 2.59644  
 H -1.76417 -2.58231 2.89672  
 C 0.85313 0.27348 2.81413  
 H 0.64302 -2.35236 2.89221  
 H -0.12464 0.68213 3.06882  
 H -1.39361 -0.93889 3.36872  
 H 1.25516 -0.28026 3.67807  
 O -0.43995 2.24187 -0.40657

53

<sup>20</sup>Co Half side-on/end-on (3)

Co -0.09435 0.56557 0.08174  
 H 1.69765 -1.63198 -3.62778  
 H -0.65038 -1.61716 -3.38664  
 H -1.35022 0.57346 -3.73258  
 H 1.26564 0.06190 -3.58093  
 C 1.31748 -0.84357 -2.96090  
 H -0.10282 1.49726 -2.83617  
 C -0.07154 -1.28006 -2.50712  
 C -1.03416 0.93548 -2.73967  
 H -2.81135 -0.82878 -2.45823  
 H 1.96863 1.89014 -2.34191  
 H 0.00782 -2.13381 -1.81816  
 H 3.33980 -0.53275 -2.26133  
 H -1.79429 1.61859 -2.35145  
 N -0.86640 -0.22181 -1.81512  
 H 3.58144 1.68079 -1.60731  
 C 2.33219 -0.69724 -1.83613  
 C -2.22251 -0.77371 -1.52664  
 H -2.09490 -1.80433 -1.17046  
 C 2.49562 1.68530 -1.40265  
 H 2.37389 -1.65054 -1.29481  
 H -3.06059 1.10237 -0.83883  
 N 2.06027 0.38670 -0.84840  
 H 2.26262 2.48288 -0.68949  
 C -2.95764 0.06535 -0.49531  
 H -3.97875 -0.33191 -0.35248  
 H 3.85170 -0.21834 0.15611  
 O 0.28648 2.18250 0.78682  
 C 2.81708 0.09104 0.39166  
 H -2.40842 -2.01101 0.72610  
 H 2.88579 1.01732 0.97679  
 H -2.49698 2.14881 1.14052

C 2.13263 -1.00270 1.19428  
 C -2.42674 -1.21740 1.48352  
 H -0.02926 -2.47644 1.14336  
 H -3.44195 -1.21874 1.92069  
 C -2.71639 1.19501 1.63324  
 H -3.85055 1.10443 1.79505  
 N 0.76459 -0.59115 1.62987  
 H 2.74054 -1.26280 2.07679  
 C 0.00812 -1.81943 2.02491  
 H 1.60315 1.10895 2.59980  
 C -1.40198 -1.57158 2.55346  
 H -2.21883 1.17925 2.60954  
 H -1.73877 -2.51361 3.01107  
 C 0.91203 0.29228 2.82420  
 H 0.59760 -2.34362 2.79842  
 H -0.04813 0.73158 3.10489  
 H -1.39695 -0.83810 3.37102  
 H 1.30734 -0.29347 3.67003  
 O -0.50340 2.41525 -0.31492

53

<sup>20</sup>Co Side-on (5)

Co -0.07488 0.38466 -0.00107  
 H 1.71573 -1.52204 -3.68490  
 H -1.59265 0.68484 -3.79558  
 H 1.34873 0.17980 -3.53011  
 C 1.31671 -0.77321 -2.98447  
 H -0.20180 1.51734 -3.03506  
 C -0.11898 -1.18801 -2.67488  
 C -1.14931 1.00885 -2.83841  
 H -2.89913 -0.81494 -2.51840  
 H 1.89219 1.87179 -2.24630  
 H -0.10980 -2.09624 -2.05319  
 H 3.30358 -0.68379 -2.13577  
 H -1.81930 1.72561 -2.35568  
 N -0.93722 -0.16535 -1.95706  
 H 3.53751 1.58344 -1.61178  
 C 2.25774 -0.75934 -1.78348  
 C -2.26098 -0.76413 -1.61949  
 H -0.08665 -1.79867 -1.29443  
 C 2.46597 1.62336 -1.34761  
 H 2.16656 -1.72174 -1.26131  
 H -3.11103 1.06602 -0.84152  
 N 0.02191 0.32725 -0.78692  
 H 2.30361 2.41263 -0.60672  
 C -2.96253 0.02495 -0.52828  
 H -3.96295 -0.40460 -0.34305  
 H 3.84721 -0.28668 0.15354  
 O 0.15607 2.19455 0.83561  
 C 8.29241 0.03969 0.43161  
 H -2.22900 -2.06116 0.69012  
 N -2.16180 0.04433 0.72793  
 H 2.04261 -1.95380 0.73443  
 H 2.93327 0.97858 0.99025  
 H -2.53439 2.09718 1.05175  
 C 2.17194 -1.02033 1.29772  
 C -2.34695 -1.25896 1.43167  
 H 0.08685 -2.51040 1.37224  
 H -3.39072 -1.31052 1.79341  
 C -2.65479 1.14784 1.58347  
 H -3.72035 1.00001 1.83288  
 N 0.82411 -0.58374 1.76395  
 H 2.81882 -1.25331 2.16087  
 C 0.05599 -1.78726 2.20093  
 H 1.62342 1.19111 2.60801  
 C -1.39619 -1.53045 2.59385  
 H -2.07844 1.19685 2.51263  
 H -1.75585 -2.45008 3.07907  
 C 0.98697 0.35225 2.90294  
 H 0.58800 -2.24926 3.05285  
 H 0.01941 0.75815 3.21082  
 H -1.46955 -0.75163 3.36484  
 H 1.44863 -0.17183 3.75735  
 O -0.40431 2.36241 -0.38725

53

<sup>20</sup>Co End-on (1)

Co -0.07971 0.27767 -0.02415  
 H 1.67524 -1.75157 -3.54187  
 H -0.69688 -1.34961 -3.69376  
 H -1.58218 0.90613 -3.70669  
 H 1.44088 -0.02085 -3.54666  
 C 1.28293 -0.92060 -2.93710  
 H -0.01444 1.45450 -3.05341  
 C -0.19840 -1.19765 -2.71900  
 C -1.01298 1.10396 -2.78278  
 H -2.95037 -0.49727 -2.56241  
 H 1.78655 1.69420 -2.37028  
 H -0.30904 -2.12937 -2.14507  
 H 3.18803 -0.89949 -1.92282  
 H -1.49974 1.89566 -2.20287

N -0.92289 -0.13404 -1.96750  
 H 3.41252 1.45318 -1.67865  
 C 2.11605 -0.88605 -1.66086  
 C -2.30428 -0.61068 -1.67573  
 H -2.25724 -1.68261 -1.44749  
 C 2.33924 1.53239 -1.44219  
 H 1.91293 -1.79734 -1.08229  
 H -2.91614 1.24028 -0.74872  
 N 1.88791 0.29231 -0.75813  
 H 2.16690 2.38680 -0.78215  
 C -2.86974 0.16940 -0.51321  
 H -3.88976 -0.17048 -0.27117  
 H 3.78642 -0.12295 0.14138  
 O -0.01449 2.13105 -0.00497  
 C 2.76028 0.13693 0.44979  
 H -1.90773 -2.07084 0.49325  
 N -1.99173 0.03603 0.69449  
 H 2.19087 -1.89806 0.90681  
 H 2.80638 1.11470 0.94568  
 H -2.28580 0.04311 1.25263  
 C 2.20508 -0.91043 1.38388  
 C -2.17014 -1.34084 1.27088  
 H 0.30014 -2.57799 1.51653  
 H -3.24281 -1.46867 1.49358  
 C -2.47649 1.04845 1.67241  
 H -3.55638 0.90854 1.84095  
 N 0.80652 -0.55955 1.76523  
 H 2.83925 -0.99635 2.28236  
 C 0.13850 -1.79422 2.27076  
 H 1.37179 1.36277 2.47394  
 C -1.35444 -1.64514 2.52136  
 H -1.96177 0.94791 2.63005  
 H -1.71194 -2.61248 2.90386  
 C 0.85935 0.46791 2.83915  
 H 0.64265 -2.11789 3.19727  
 H -0.14671 0.75983 3.14769  
 H -1.55710 -0.92272 3.32281  
 H 1.93686 0.06789 3.71475  
 O -1.07097 2.94571 -0.13856

53

<sup>20</sup>Co End-on (3)

Co -0.06771 0.30504 -0.00501  
 H 1.68111 -1.74206 -3.53896  
 H -0.69257 -1.36601 -3.69464  
 H -1.58306 0.89117 -3.72017  
 H 1.43280 -0.01336 -3.53984  
 C 1.28095 -0.91583 -2.93279  
 H -0.01979 1.44627 -3.06117  
 C -0.19966 -1.20419 -2.71826  
 C -1.01856 1.09332 -2.79387  
 H -2.96177 -0.50108 -2.55094  
 H 1.79692 1.70785 -2.35792  
 H -0.30521 -2.13407 -2.13998  
 H 3.18688 -0.89924 -1.92057  
 H -1.50975 1.88612 -2.21913  
 N -0.92853 -0.14118 -1.97479  
 H 3.42641 1.45751 -1.67607  
 C 2.11542 -0.87930 -1.65689  
 C -2.30663 -0.61132 -1.66999  
 H -2.62611 -1.68245 -1.43707  
 C 2.35459 1.54023 -1.43375  
 H 1.90962 -1.78874 -1.07648  
 H -2.90150 1.24863 -0.74719  
 N 1.90062 0.30125 -0.75192  
 H 2.19098 2.39383 -0.76999  
 C -2.86497 0.17791 -0.50800  
 H -3.88855 -0.55231 -0.26709  
 H 3.79701 -0.13287 0.14379  
 O -0.03766 2.13395 -0.05876  
 C 2.72729 0.13281 0.45373  
 H -1.90878 -2.06073 0.49273  
 N -1.99491 0.04484 0.70523  
 H 2.19848 -1.90739 0.90231  
 H 2.82640 1.10711 0.95571  
 H -2.29387 2.04863 1.27001  
 C 2.21040 -0.91764 1.38104  
 C -2.17016 -1.33504 1.27443  
 H 2.92558 -2.58409 1.50602  
 H -3.24238 -1.46490 1.49815  
 C -2.48949 1.05189 1.68332  
 H -3.57103 0.91149 1.84106  
 N 0.80869 -0.56725 1.75548  
 H 2.83734 -1.00597 2.28396  
 C 0.13941 -1.80111 2.26217  
 H 1.37756 1.35484 2.46500  
 C -1.35137 -1.64643 2.52084  
 H -1.98462 0.94634 2.64592  
 H -1.71077 -2.61351 2.90205  
 C 0.85738 0.46370 2.82820  
 H 0.65202 -2.12617 3.18518  
 H -1.04962 0.76050 3.12821

H -1.54722 -0.92548 3.32528  
 H 1.38857 0.06245 3.70785  
 O -1.10929 2.94062 -0.14541

53

<sup>20</sup>Co End-on (5)

Co -0.06800 0.40595 -0.01167  
 H 1.70705 -1.58363 -3.68476  
 H -0.66078 -1.38967 -3.63298  
 H -1.64414 0.85396 -3.59040  
 H 1.37398 0.12573 -3.55636  
 C 1.32168 -0.81729 -2.99574  
 H -0.08589 1.44927 -2.95253  
 C -0.12046 -1.20446 -2.68697  
 C -1.06405 1.04973 -2.67296  
 H -2.85293 -0.80269 -2.53479  
 H 1.91930 1.82457 -2.31739  
 H -0.13145 -2.14539 -2.11741  
 H 3.30607 -0.74777 -2.13784  
 H -1.57310 1.81136 -2.07200  
 N -0.90167 -0.20700 -1.89315  
 H 3.55446 1.54847 -1.66038  
 C 2.25699 -0.80027 -1.79141  
 C -2.24715 -0.78615 -1.61265  
 H -2.09978 -1.83024 -1.30541  
 C 2.48090 1.59350 -1.40603  
 H 2.14533 -1.74997 -1.25069  
 H -3.13092 1.03378 -0.84582  
 N 2.03014 0.30987 -0.81983  
 H 2.31131 2.39992 -0.68515  
 C -2.96954 -0.00493 -0.53094  
 H -3.96680 -0.44642 -0.35658  
 H 3.85112 -0.28730 1.03867  
 O -0.03965 2.21208 0.44453  
 C 2.83255 0.04568 0.40574  
 H -2.21801 -2.08236 0.68621  
 N -2.17912 0.02294 0.72880  
 H 2.07459 -1.95300 0.75684  
 H 2.93902 0.99492 0.94682  
 H -2.56549 2.07553 1.06033  
 C 2.16889 -0.99671 1.28724  
 C -2.34738 -1.28330 1.42883  
 H 0.10747 -2.52718 1.39166  
 H -3.39035 -1.34973 1.79081  
 C -2.69295 1.12032 1.58112  
 H -3.76280 0.96734 1.80845  
 N 0.79785 -0.56993 1.69537  
 H 2.78894 -1.18186 2.18065  
 C 0.06284 -1.77331 2.19128  
 H 1.50554 1.29013 2.44019  
 C -1.39075 -1.53947 2.58860  
 H -2.13978 1.16504 2.52498  
 H -1.73179 -2.46472 3.07660  
 C 0.91400 0.43694 2.78442  
 H 0.61708 -2.18065 3.05621  
 H -0.07341 0.80760 3.07138  
 H -1.47471 -0.76135 3.35934  
 H 1.40235 -0.01313 3.66511  
 O -0.58022 3.22683 -0.21732

51

<sup>28</sup>Ni No O<sub>2</sub> (2)

Ni -0.07591 -0.03189 -0.04413  
 H 1.76700 -1.38856 -3.76645  
 H -0.60662 -1.23989 -3.80050  
 H -1.71849 0.91111 -3.63615  
 H 1.39762 0.29935 -3.51547  
 C 1.33896 -0.68716 -3.03379  
 H -0.18992 1.54935 -2.97249  
 C -0.11136 -1.11251 -2.81751  
 C -1.14457 1.08715 -2.70700  
 H -2.87377 -0.83801 -2.58425  
 H 1.63366 1.86832 -2.05962  
 H -0.12570 -2.09051 -2.31397  
 H 3.29089 -0.61240 -2.11244  
 H -1.69319 1.79670 -2.07906  
 N -0.91972 -0.18379 -1.97992  
 H 3.30417 1.71346 -1.45221  
 C 2.23686 -0.75021 -1.79967  
 C -2.22942 -0.82181 -1.68461  
 H -2.03449 -1.86535 -1.40256  
 C 2.23591 1.61063 -1.18376  
 H 2.15827 -1.75273 -1.35457  
 H -3.15039 0.94313 -0.85369  
 N 1.93032 0.23724 -0.72402  
 H 1.99826 2.32035 -0.38279  
 C -2.93649 -0.09099 -0.55730  
 H -3.90837 -0.56980 -0.34384  
 H 3.78353 -0.42254 0.13786  
 C 2.78901 -0.06435 0.45707  
 H -2.19059 -2.14384 0.76776  
 N -2.08974 -0.04960 0.66810

H 1.98627 -2.03694 0.82087  
 H 2.95127 0.87281 1.00366  
 H -2.28737 2.04450 0.86879  
 C 2.12804 -1.09037 1.35972  
 C -2.32810 -1.29529 1.45332  
 H 0.11929 -2.59426 1.65770  
 H -3.38703 -1.30603 1.77914  
 C -2.47132 1.14084 1.46138  
 H -3.54048 1.10581 1.74304  
 N 0.78722 -0.61647 1.79439  
 H 2.77536 -1.29842 2.23260  
 C 0.04161 -1.76616 2.37754  
 H 1.46708 1.31207 2.37454  
 C -1.43144 -1.49621 2.67348  
 H -1.87615 1.20393 2.37664  
 H -1.81526 -2.38460 3.19814  
 C 0.94923 0.45075 2.80859  
 H 0.54753 -2.08962 3.30880  
 H -0.02712 0.79402 3.16162  
 H -1.54707 -0.67109 3.39010  
 H 1.52811 0.08167 3.67604

51

<sup>28</sup>Ni No O<sub>2</sub> (4)

Ni -0.07275 0.52479 0.00675  
 H 1.63729 -1.63699 -3.67123  
 H -0.71524 -1.51688 -3.47815  
 H -1.49957 0.74262 -3.64296  
 H 1.26995 0.06986 -3.59749  
 C 1.27655 -0.84837 -2.99413  
 H -0.08130 1.48479 -2.83698  
 C -0.13474 -1.24792 -2.57698  
 C -1.05194 1.01135 -2.67010  
 H -2.87031 -0.76521 -2.44255  
 H 1.96408 1.83164 -2.39673  
 H -0.09528 -2.14055 -1.93567  
 H 3.30193 -0.65789 -2.26392  
 H -1.69221 1.73978 -2.16299  
 H -0.90253 -0.20760 -1.83110  
 H 3.57748 1.61776 -1.66216  
 C 2.28092 -0.76042 -1.85151  
 C -2.25693 -0.74924 -1.52556  
 H -2.13262 -1.79241 -1.20689  
 C 2.49183 1.63183 -1.45735  
 H 2.25638 -1.10924 -2.19996  
 H -3.06361 1.11043 -0.76490  
 N 2.05348 0.34516 -0.87924  
 H 2.25457 2.43979 -0.75334  
 C -2.95322 0.06431 -0.45059  
 H -3.97092 -0.33284 -0.82541  
 H 3.86385 -0.23378 0

N -0.87314 -0.22423 -1.82169  
H 3.53038 1.72148 -1.55170  
C 2.32030 -0.69049 -1.82226  
C -2.23253 -0.76138 -1.52635  
H -2.11539 -1.79400 -1.17361  
C 2.44110 1.69991 -1.37202  
H 2.37743 -1.64337 -1.28211  
H -3.01837 1.13146 -0.82911  
N 2.03255 0.38671 -0.82929  
H 2.16679 2.48200 -0.65655  
C -2.93550 0.09225 -0.48763  
H -3.96173 -0.28228 -0.32459  
H 3.84077 -0.19169 0.15581  
O 0.19901 2.19550 0.83367  
C 2.80451 0.09756 0.40513  
H -2.39549 -1.99918 0.71084  
N -2.17271 0.09538 0.78632  
H 2.05439 -1.92785 0.60708  
H 2.85942 1.02273 0.99263  
H -2.40342 2.15890 1.15030  
C 2.13777 -1.00883 1.20128  
C -2.40318 -1.20949 1.47207  
H -0.01608 -2.51037 1.14946  
H -3.42065 -1.19390 1.90346  
C -2.64422 1.20868 1.63772  
H -3.73420 1.13571 1.79915  
N 0.76058 -0.61274 1.61524  
H 2.73920 -1.25335 2.09269  
C 0.01593 -1.84138 2.02198  
H 1.57182 1.10910 2.56633  
C -1.39376 -1.59018 2.54562  
H -2.14719 1.17654 2.61315  
H -1.74430 -2.53558 2.98545  
C 0.88199 0.29298 2.79459  
H 0.60702 -2.35085 2.80430  
H -0.08390 0.73419 3.04757  
H -1.38694 -0.86862 3.37350  
H 1.26461 -0.27738 3.65688  
O -0.44284 2.32529 -0.38270

53

<sup>2</sup>Ni Side-on (4)

Ni -0.07587 0.41966 -0.00128  
H 1.72151 -1.58428 -3.63892  
H -0.65498 -1.46442 -3.61968  
H -1.54057 0.68363 -3.78006  
H 1.34326 0.12013 -3.53996  
C 1.30324 -0.81782 -2.96943  
H -0.14707 1.48377 -2.99586  
H -0.13550 -1.22660 -2.67205  
C -1.10424 0.98908 -2.81292  
H -2.90754 -0.76704 -2.51215  
H 1.85876 1.86412 -2.27503  
H -0.13732 -2.13981 -2.05871  
H 3.26770 -0.71006 -2.07514  
H -1.76948 1.71380 -2.33590  
N -0.92410 -0.19893 -1.93997  
H 3.50355 1.55650 -1.65255  
C 2.21309 -0.76957 -1.74764  
C -2.26484 -0.75165 -1.61409  
H -2.13159 -1.79553 -1.30094  
C 2.43659 1.62372 -1.37677  
H 2.09936 -1.71443 -1.20051  
H -3.05653 1.10449 -0.83557  
N 1.97528 0.34778 -0.78091  
H 2.30380 2.43341 -0.65227  
C -2.93167 0.06130 -0.51894  
H -3.94047 -0.33851 -0.31380  
H 3.82275 -0.21050 0.14460  
O 0.15689 2.33860 0.84074  
C 2.79730 0.08038 0.43355  
H -2.17821 -2.03788 0.63978  
N -2.11503 0.06626 0.72867  
H 2.09754 -1.94793 0.74630  
H 2.87583 1.02072 0.99424  
H -2.53674 2.10664 1.09331  
C 2.17677 -1.00238 1.29761  
C -2.30514 -1.25701 1.40049  
H 0.11427 -2.55388 1.35769  
H -3.35556 -1.31070 1.74246  
C -2.62019 1.14535 1.61025  
H -3.67729 0.96763 1.87406  
N 0.80997 -0.61241 1.73357  
H 2.82165 -1.19407 2.17324  
C 0.07458 -1.82581 2.18109  
H 1.57938 1.17347 2.59231

C -1.37842 -1.57331 2.56813  
H -0.03241 1.19480 2.53225  
H -1.75472 -2.50483 3.01694  
C 0.93430 0.33572 2.87032  
H 0.61051 -2.27047 3.04097  
H -0.04134 0.74343 3.14698  
H -1.45562 -0.81903 3.36308  
H 1.36933 -0.17912 3.74489  
O -0.39962 2.45918 -0.35078

53

<sup>2</sup>Ni End-on (2)

Ni -0.07055 0.22699 -0.00996  
H 1.69573 -1.59524 -3.64170  
H -0.66253 -1.31178 -3.68704  
H -1.56243 0.88951 -3.71875  
H 1.42709 0.12659 -3.52547  
C 1.31332 -0.81351 -2.96844  
H -0.11045 1.57386 -2.93029  
C -0.15461 -1.14308 -2.71947  
C -1.08584 1.11446 -2.74914  
H -2.91428 -0.66242 -2.56304  
H 1.81958 1.78230 -2.28519  
H -0.21562 -2.08502 -2.15412  
H 3.26353 -0.81389 -2.03328  
H -1.69979 1.83912 -2.20516  
N -0.93188 -0.12425 -1.94993  
H 3.46926 1.50787 -1.66474  
C 2.20126 -0.83510 -1.72638  
C -2.27777 -0.69923 -1.66212  
H -2.14046 -1.75930 -1.41149  
C 2.40258 1.56295 -1.38596  
H 2.03840 -1.78108 -1.19025  
C -3.09581 1.08902 -0.77157  
N 1.97704 0.28641 -0.76803  
H 2.25426 2.37552 -0.66802  
C -2.95281 0.03055 -0.51905  
H -3.95496 -0.39667 -0.33885  
H 3.82085 -0.22556 0.18237  
O -0.29558 2.17300 0.11465  
C 2.79597 0.08006 0.45644  
H -2.11407 -2.12842 0.62163  
N -2.13215 -0.02457 0.72355  
H 2.10714 -1.92588 0.87088  
H 2.86879 1.04902 0.96640  
H -2.48417 2.01633 1.13445  
C 2.17409 -0.95243 1.37380  
C -2.30433 -1.35328 1.37732  
H 0.19238 -2.53799 1.47037  
H -3.36093 -1.45676 1.68706  
C -2.61070 1.04774 1.62782  
H -3.67628 0.89647 1.87373  
N 0.79397 -0.55071 1.77844  
H 2.80640 -1.09325 2.26675  
C 0.08202 -1.77709 2.25709  
H 1.37591 1.35532 2.49933  
H -1.39835 -1.60542 2.57993  
H -2.03789 1.05967 2.55964  
H -1.72917 -2.5473 3.02714  
C 0.88014 0.45187 2.86795  
H 0.60949 -2.15621 3.15148  
H -0.11218 0.73706 3.20201  
H -1.55271 -0.85069 3.36307  
H 1.43805 0.03757 3.72558  
O 0.57376 2.89817 0.77757

53

<sup>2</sup>Ni End-on (4)

Ni -0.07426 0.25415 -0.02771  
H 1.68269 -1.64197 -3.64622  
H -0.67159 -1.34409 -3.67429  
H -1.57449 0.88294 -3.72148  
H 1.42782 0.08292 -3.54973  
C 1.31246 -0.84892 -2.97940  
H -0.07070 1.52109 -2.99721  
C -0.15573 -1.16362 -2.71315  
H -0.05711 1.10617 -2.77255  
H -2.91135 -0.63209 -2.56717  
H 1.84780 1.75702 -2.32094  
H -0.22077 -2.09507 -2.13126  
H 3.27177 -0.84600 -2.06361  
H -1.61746 1.86311 -2.21447  
N -0.92077 -0.12458 -1.95743  
H 3.49679 1.47955 -1.70061  
C 2.21232 -0.86042 -1.74604  
C -2.27572 -0.67673 -1.66619

H -2.15669 -1.73807 -1.41187  
C 2.43043 1.53932 -1.42110  
H 2.05147 -1.80053 -1.19950  
H -3.05551 1.13176 -0.78376  
N 1.99227 0.26869 -0.79585  
H 2.28422 2.35957 -0.71198  
C -2.93695 0.07134 -0.52701  
H -3.94596 -0.33745 -0.34207  
H 3.83794 -0.25993 0.15467  
O 0.03724 2.16382 0.24236  
C 2.81724 0.06103 0.42744  
H -2.07047 -2.09679 0.60345  
N -2.11501 0.00890 0.71484  
H 2.10807 -1.93317 0.85849  
H 2.90972 1.03149 0.93195  
H -2.50979 2.03819 1.13682  
C 1.81557 -0.95684 1.35393  
H -2.27916 -1.32668 1.35908  
H 2.07014 -2.53027 1.48862  
H -3.33825 -1.44164 1.65545  
C -2.60639 1.06637 1.63091  
H -3.66445 0.88601 1.88940  
N 0.81048 -0.53966 1.75847  
H 2.81881 -1.09780 2.24654  
C 0.09565 -1.75393 2.25973  
H 1.45857 1.35106 2.46991  
C -1.38529 -1.57308 2.57182  
H -2.02257 1.08730 2.55586  
H -1.72320 -2.51738 3.02422  
C 0.90913 0.47754 2.83384  
H 0.61921 -2.11577 3.16365  
H -0.08702 0.81100 3.13708  
H -1.54140 -0.81104 3.34741  
H 1.42982 0.05732 3.71171  
O -0.90015 2.99740 -0.13406

51

<sup>2</sup>Cu No O<sub>2</sub> (1)

Cu -0.05472 -0.03488 -0.05917  
H 1.69911 -1.40450 -3.77692  
H -0.64565 -1.16457 -3.75602  
H -1.58842 1.04270 -3.51801  
H 1.39780 0.28824 -3.49024  
C 1.32771 -0.70065 -3.01588  
H -0.09945 1.81288 -2.69942  
H -0.13401 -1.09154 -2.77587  
C -1.07885 1.14481 -2.54216  
H -2.87105 -0.76041 -2.56620  
H 2.14385 1.83811 -2.25642  
H -0.16909 -2.08863 -2.31331  
H 3.32631 -0.85213 -2.20172  
H -1.66499 1.81288 -1.90289  
N -0.92273 -0.17909 -1.89485  
H 0.77196 1.48007 -1.62056  
C 2.28424 -0.80634 -1.82208  
C -2.26156 -0.78169 -1.64267  
H -2.10123 -1.83799 -1.38791  
C 2.69744 1.54859 -1.35557  
H 2.09528 -1.75949 -1.30635  
H -3.27378 0.95562 -0.84027  
N 2.18777 2.07977 -0.81763  
H 2.56999 2.34212 -0.60881  
C -3.03740 -0.07141 -0.53219  
H -4.00810 -0.59029 -0.40457  
H 3.91540 -0.51575 0.16386  
C 2.92734 -0.07759 0.40849  
H -2.12138 -2.08496 0.72687  
N -2.29999 0.00622 0.74616  
H 2.05433 -2.02895 0.80622  
H 3.12792 0.85181 0.95771  
H -2.77134 2.03975 1.04302  
C 2.18074 -1.06152 1.31037  
C -2.35257 -1.29473 1.45631  
H 0.15263 -2.56860 1.65808  
H -3.93146 -1.47617 1.80307  
C -2.86154 1.08426 1.57468  
H -3.93061 0.91018 1.81218  
N 0.82235 -0.58380 1.69297  
H 2.79133 -1.24288 2.21519  
C 0.07512 -1.70571 2.33567  
H 1.47590 1.38421 2.16191  
C -1.40045 -1.43912 2.64942  
H -2.31350 1.16704 2.52009  
H -1.74385 -2.31487 3.22166  
C 0.93212 0.55787 2.63107  
H 0.59284 -1.98046 3.27618

H -0.06455 0.92068 2.89918  
H -1.50756 -0.59197 3.34159  
H 1.46363 0.25616 3.55225

51

<sup>2</sup>Cu No O<sub>2</sub> (3)

Cu -0.06561 0.36800 -0.00778  
H 1.70677 -1.62310 -3.66037  
H -0.64871 -1.41552 -3.64603  
H -1.57912 0.79145 -3.74829  
H 1.40028 0.09417 -3.55831  
C 1.32356 -0.84141 -2.98800  
H -0.10066 1.49179 -3.02063  
C -0.13006 -1.19713 -2.69410  
C -1.07586 1.05013 -2.79977  
H -2.89442 -0.72867 -2.53211  
H 1.87254 1.77547 -2.31480  
H -0.16399 -2.11513 -2.08899  
H 3.29471 -0.77246 -2.10944  
H -1.66302 1.80034 -2.26018  
N -0.91342 -0.16120 -1.96357  
H 3.49195 1.58837 -1.58462  
C 2.24379 -0.82867 -1.77069  
C -2.25281 -0.72393 -1.63397  
H -2.11296 -1.77187 -1.33723  
C 2.40687 1.57940 -1.38053  
H 2.12986 -1.77942 -1.23226  
H -3.01909 1.1743 -0.80747  
N 2.01002 0.27737 -0.80210  
H 1.14660 2.37209 -0.66726  
C -2.92113 0.06106 -0.52577  
H -3.93866 -0.32631 -0.34509  
H 3.83766 -0.24895 0.16803  
C 2.80960 0.05182 0.43383  
H -2.18909 -2.08921 0.65516  
N -2.12689 0.01184 0.73327  
H 2.08004 -1.95101 0.79315  
H 2.87835 1.01233 0.96046  
H -2.33121 2.07237 1.11144  
C 2.17429 -0.99469 1.32307  
C -2.32057 -1.30023 1.40783  
H 0.114389 -2.53441 1.41248  
H -3.36893 -1.35788 1.75327  
C -2.56566 1.12158 1.60729  
H -3.56024 1.04653 1.80062  
N 0.81152 -0.57966 1.76231  
H 2.81406 -1.17572 2.20383  
C 0.07433 -1.79144 2.22017  
H 1.48847 1.28209 2.50968  
C -1.36077 -1.57919 2.58508  
H -2.03639 1.09772 2.56466  
H -1.73793 -2.51960 3.03798  
C 0.92791 0.40917 2.85925  
H 0.60610 -2.20951 3.09476  
H -0.06158 0.75771 3.16724  
H -1.50161 -0.82229 3.37324  
H 1.44094 -0.04445 3.72607

53

<sup>2</sup>Cu End-on (1)

Cu -0.07236 0.32745 -0.00506  
H 1.70733 -1.64789 -3.61900  
H -0.66249 -1.36099 -3.73873  
H -1.57603 0.85685 -3.75703  
H 1.41412 0.07131 -3.54018  
C 1.29483 -0.86046 -2.97061  
H -0.07803 1.48507 -3.01400  
C -0.17811 -1.19783 -2.75671  
C -1.06549 1.06719 -2.80011  
H -2.95676 -0.63489 -2.55177  
H 1.85626 1.76161 -2.31814  
H -0.25340 -2.14050 -2.19487  
H 3.22025 -0.87226 -1.99692  
H -1.63284 1.82109 -2.24520  
N -0.93877 -0.17230 -1.99893  
H 3.49207 1.48240 -1.66204  
C 2.15332 -0.85524 -1.70800  
H -2.29047 -0.68815 -1.67193  
H -2.19494 -1.75005 -1.41093  
C 2.42127 1.55431 -1.40475  
H 1.95725 -1.77856 -1.14609  
H -3.00773 1.15571 -0.79801  
N 1.96296 0.29679 -0.77028  
H 2.26908 2.38644 -0.70996  
C -2.90706 0.09656 -0.52774  
H -3.92054 -0.28435 -0.31263

H 3.82051 -0.23219 0.14375  
O 0.01758 2.40657 0.12422  
C 2.80135 0.06848 0.44283  
H -1.97264 -2.06193 0.56402  
N -2.07551 0.03983 0.71156  
H 2.14608 -1.95544 0.85631  
H 2.89117 1.02909 0.96624  
H -2.44490 2.06362 1.17048  
C 2.20336 -0.98234 1.36035  
C -2.21741 -1.31581 1.33145  
H 0.24169 -2.59675 1.54685  
H -3.28323 -1.45159 1.58953  
C -2.58289 1.08144 1.63595  
H -3.65537 0.91828 1.83809  
N 0.83172 -0.60254 1.78319  
H 2.85841 -1.11459 2.23990  
C 0.12073 -1.80021 2.29735  
H 1.44693 1.31520 2.45785  
C -1.36531 -1.59029 2.56741  
H -2.04306 1.05842 2.58715  
H -1.74223 -2.52867 3.00087  
C 0.91695 0.43627 2.83779  
H 0.61624 -2.14763 3.22447  
H -0.08271 0.75592 3.14402  
H -1.52693 -0.83124 3.34464  
H 1.45176 0.04446 3.72130  
O -1.01959 3.16768 -0.10694

53

<sup>2</sup>Cu End-on (3)

Cu -0.07487 0.35249 -0.00091  
H 1.70818 -1.62782 -3.62563  
H -0.65931 -1.36692 -3.73796  
H -1.58093 0.84267 -3.77063  
H 1.40578 0.08901 -3.53222  
C 1.29351 -0.84785 -2.96947  
H -0.09675 1.49092 -3.01598  
C -0.17741 -1.95102 -2.75551  
C -1.08084 1.06091 -2.80951  
H -0.09639 -0.17268 -2.54840  
H 1.88715 1.77587 -2.31096  
H -0.24617 -2.13638 -2.19019  
H 3.22334 -0.87528 -2.00314  
H -1.66508 1.81005 -2.26547  
N -0.94639 -0.17268 -2.00238  
H 3.52370 1.47163 -1.66648  
C 2.15735 -0.84782 -1.70969  
C -2.29352 -0.69422 -1.67058  
H -2.19170 -1.75493 -1.40672  
C 2.45503 1.55566 -1.40197  
H 1.95571 -1.77010 -1.14788  
H -3.03061 1.14557 -0.80170  
N 1.98053 0.30413 -0.77010  
H 2.32092 2.38835 -0.70387  
C -2.91759 0.08869 -0.52660  
H -3.92858 -0.30178 -0.31483  
H 3.83034 -0.25020 0.14601  
O 0.01300 2.40663 0.07393  
C 2.81290 0.06071 0.44253  
H -1.96951 -2.05470 0.56781  
N -2.09075 0.04546 0.71518  
H 2.14268 -1.96033 0.85086  
H 2.91267 1.01780 0.97092  
H -2.48067 2.06605 1.17747  
C 2.20555 -0.98910 1.35812  
C -2.22017 -1.31103 1.33573  
H 0.23655 -2.59621 1.54833  
H -3.28484 -1.45722 1.59443  
C -2.61275 1.08032 1.63742  
H -3.68557 0.91101 1.83442  
N 0.83720 -0.60539 1.78412  
H 2.86261 -1.12820 2.23565  
C 0.12110 -1.80063 2.29896  
H 1.47016 1.30477 2.46234  
C -1.36412 -1.58119 2.57059  
H -2.07749 1.05983 2.59159  
H -1.74337 -2.51553 3.01093  
C 0.92712 0.43217 2.83873  
H 0.61475 -2.15035 3.22606  
H -0.07107 0.76379 1.3795  
H -1.52049 -0.81711 3.34405  
H 1.45197 0.03650 3.72705  
O -1.00885 3.18676 -0.07138
